# Supplementary material for: Draft Genomes of Nitrogen-fixing Frankia Strains Ag45/Mut15 and AgPM24 Isolated from Root Nodules of Alnus Glutinosa
Source: PubMed Central journal article supplement (PMC9194555; doi:10.7150/jgen.74788), 2022-06-06
Supplement: jgenv10p0049s1.pdf [file jgenv10p0049s1.pdf]

Supp. Table1

Genes of Frankia Ag45Mut15 with homologs in AgPm24 without homologs in ACN14a, QA3, Cpl1, ARgP5

Homology constraints: minLrap ≥ 0.8 ; maxLrap ≥ 0 ; Identity ≥ 50% similarities involved in a Synteny group

1068 results

| Label            | Begin   | End     | Evidence           | Gene | Product                                                                    |
|------------------|---------|---------|--------------------|------|----------------------------------------------------------------------------|
| FUMID1_v1_100001 | 6414189 | 6414359 | automatic/finished | —    | protein of unknown function                                                |
| FUMID1_v1_100008 | 2899686 | 2900066 | automatic/finished | —    | protein of unknown function                                                |
| FUMID1_v1_10001  | 287     | 622     | automatic/finished | —    | protein of unknown function                                                |
| FUMID1_v1_10002  | 797     | 1282    | automatic/finished | —    | Uncharacterized HTH-type transcriptional regulator Rv3095                  |
| FUMID1_v1_10003  | 1362    | 1952    | automatic/finished | —    | putative _PNPOx domain-containing protein                                  |
| FUMID1_v1_100036 | 2926389 | 2926556 | automatic/finished | —    | protein of unknown function                                                |
| FUMID1_v1_100048 | 2935523 | 2935963 | automatic/finished | —    | protein of unknown function                                                |
| FUMID1_v1_100059 | 2951813 | 2952280 | automatic/finished | —    | SnoaL-like domain-containing protein                                       |
| FUMID1_v1_10006  | 4200    | 4697    | automatic/finished | —    | MarR family transcriptional regulator                                      |
| FUMID1_v1_100060 | 2952277 | 2953047 | automatic/finished | —    | putative epoxide hydrolase                                                 |
| FUMID1_v1_100073 | 2970441 | 2971433 | automatic/finished | tauD | taurine dioxygenase                                                        |
| FUMID1_v1_100077 | 2973102 | 2974163 | automatic/finished | —    | NitT/TauT family transport system substrate-binding protein                |
| FUMID1_v1_10008  | 4899    | 6443    | automatic/finished | —    | MFS transporter permease                                                   |
| FUMID1_v1_100084 | 2994003 | 2995262 | automatic/finished | —    | putative ATPase                                                            |
| FUMID1_v1_100085 | 2995259 | 2995876 | automatic/finished | —    | conserved protein of unknown function                                      |
| FUMID1_v1_100099 | 3014392 | 3014730 | automatic/finished | —    | protein of unknown function                                                |
| FUMID1_v1_10010  | 7413    | 8879    | automatic/finished | —    | conserved protein of unknown function                                      |
| FUMID1_v1_100119 | 3027646 | 3028545 | automatic/finished | —    | protein of unknown function                                                |
| FUMID1_v1_100128 | 3037329 | 3037949 | automatic/finished | —    | protein of unknown function                                                |
| FUMID1_v1_100138 | 3048840 | 3049160 | automatic/finished | —    | protein of unknown function                                                |
| FUMID1_v1_10019  | 15214   | 15417   | automatic/finished | —    | protein of unknown function                                                |
| FUMID1_v1_10055  | 64706   | 65029   | automatic/finished | —    | protein of unknown function                                                |
| FUMID1_v1_10056  | 65539   | 67374   | automatic/finished | —    | conserved exported protein of unknown function                             |
| FUMID1_v1_10058  | 67814   | 68242   | automatic/finished | —    | protein of unknown function                                                |
| FUMID1_v1_10064  | 74087   | 75286   | automatic/finished | —    | Histidine kinase domain-containing protein                                 |
| FUMID1_v1_10065  | 76153   | 76968   | automatic/finished | —    | conserved membrane protein of unknown function                             |
| FUMID1_v1_10074  | 85634   | 86713   | automatic/finished | —    | FAD-dependent oxidoreductase                                               |
| FUMID1_v1_10078  | 88063   | 88287   | automatic/finished | —    | protein of unknown function                                                |
| FUMID1_v1_10085  | 96747   | 97604   | automatic/finished | —    | TetR/AcrR family transcriptional regulator, tetracycline repressor protein |
| FUMID1_v1_10086  | 97744   | 99312   | automatic/finished | —    | peptide/nickel transport system substrate-binding protein                  |
| FUMID1_v1_10087  | 99309   | 100400  | automatic/finished | —    | peptide/nickel transport system permease protein                           |
| FUMID1_v1_10088  | 100417  | 101283  | automatic/finished | —    | peptide/nickel transport system permease protein                           |
| FUMID1_v1_10089  | 101280  | 103262  | automatic/finished | —    | peptide/nickel transport system ATP-binding protein                        |
| FUMID1_v1_10091  | 104126  | 104656  | automatic/finished | —    | membrane protein of unknown function                                       |
| FUMID1_v1_10092  | 104692  | 106539  | automatic/finished | —    | ABC transporter related                                                    |
| FUMID1_v1_10093  | 106536  | 108449  | automatic/finished | —    | ABC transporter related                                                    |
| FUMID1_v1_10094  | 108577  | 109281  | automatic/finished | —    | TetR/AcrR family transcriptional regulator, tetracycline repressor protein |
| FUMID1_v1_10095  | 109422  | 109493  | automatic/finished | —    | protein of unknown function                                                |
| FUMID1_v1_10100  | 113823  | 115091  | automatic/finished | —    | Diguanylate phosphodiesterase                                              |
| FUMID1_v1_10101  | 115249  | 116073  | automatic/finished | —    | SDR family oxidoreductase                                                  |
| FUMID1_v1_10115  | 128559  | 130784  | automatic/finished | —    | eukaryotic-like serine/threonine-protein kinase                            |
| FUMID1_v1_10121  | 139313  | 139633  | automatic/finished | —    | protein of unknown function                                                |
| FUMID1_v1_10124  | 142908  | 143060  | automatic/finished | —    | protein of unknown function                                                |
| FUMID1_v1_10132  | 149280  | 149498  | automatic/finished | —    | protein of unknown function                                                |
| FUMID1_v1_10148  | 164914  | 165243  | automatic/finished | —    | protein of unknown function                                                |
| FUMID1_v1_10172  | 188213  | 189430  | automatic/finished | —    | conserved protein of unknown function                                      |
| FUMID1_v1_10175  | 192140  | 192499  | automatic/finished | —    | protein of unknown function                                                |
| FUMID1_v1_10176  | 192517  | 192981  | automatic/finished | —    | protein of unknown function                                                |
| FUMID1_v1_10180  | 197179  | 197379  | automatic/finished | —    | protein of unknown function                                                |
| FUMID1_v1_10210  | 230601  | 231878  | automatic/finished | —    | conserved protein of unknown function                                      |
| FUMID1_v1_10214  | 233466  | 233837  | automatic/finished | —    | protein of unknown function                                                |
| FUMID1_v1_10225  | 242639  | 243280  | automatic/finished | —    | protein of unknown function                                                |
| FUMID1_v1_10270  | 285795  | 286265  | automatic/finished | —    | protein of unknown function                                                |
| FUMID1_v1_10295  | 309721  | 309915  | automatic/finished | —    | protein of unknown function                                                |
| FUMID1_v1_10299  | 315877  | 316791  | automatic/finished | —    | protein of unknown function                                                |
| FUMID1_v1_10300  | 316838  | 319939  | automatic/finished | —    | conserved protein of unknown function                                      |
| FUMID1_v1_10313  | 336206  | 336415  | automatic/finished | —    | protein of unknown function                                                |
| FUMID1_v1_10316  | 340187  | 340765  | automatic/finished | —    | protein of unknown function                                                |
| FUMID1_v1_10330  | 354895  | 357558  | automatic/finished | —    | ATPase involved in chromosome partitioning                                 |
| FUMID1_v1_10333  | 359941  | 360174  | automatic/finished | —    | protein of unknown function                                                |
| FUMID1_v1_10354  | 379031  | 379960  | automatic/finished | —    | conserved protein of unknown function                                      |
| FUMID1_v1_10365  | 392147  | 392470  | automatic/finished | —    | protein of unknown function                                                |

|                  |         |         |                    |       |                                                                     |
|------------------|---------|---------|--------------------|-------|---------------------------------------------------------------------|
| FUMID1_v1_10372  | 398329  | 398733  | automatic/finished | —     | SEC-C motif domain protein                                          |
| FUMID1_v1_10373  | 399052  | 399648  | automatic/finished | —     | protein of unknown function                                         |
| FUMID1_v1_10375  | 399760  | 399948  | automatic/finished | —     | protein of unknown function                                         |
| FUMID1_v1_10383  | 405076  | 407925  | automatic/finished | —     | Non-specific serine/threonine protein kinase                        |
| FUMID1_v1_10390  | 414523  | 414771  | automatic/finished | —     | protein of unknown function                                         |
| FUMID1_v1_10393  | 416370  | 416612  | automatic/finished | —     | protein of unknown function                                         |
| FUMID1_v1_10404  | 426135  | 426764  | automatic/finished | inhA  | Isonitrile hydratase                                                |
| FUMID1_v1_10411  | 430108  | 430527  | automatic/finished | —     | protein of unknown function                                         |
| FUMID1_v1_10415  | 434919  | 435140  | automatic/finished | —     | protein of unknown function                                         |
| FUMID1_v1_10420  | 438118  | 439689  | automatic/finished | —     | Sulfatase                                                           |
| FUMID1_v1_10422  | 440741  | 441103  | automatic/finished | —     | YCII domain-containing protein                                      |
| FUMID1_v1_10426  | 443482  | 443850  | automatic/finished | —     | protein of unknown function                                         |
| FUMID1_v1_10427  | 444102  | 444233  | automatic/finished | —     | protein of unknown function                                         |
| FUMID1_v1_10428  | 444296  | 445210  | automatic/finished | —     | protein of unknown function                                         |
| FUMID1_v1_10429  | 445687  | 446217  | automatic/finished | —     | protein of unknown function                                         |
| FUMID1_v1_10431  | 446881  | 448488  | automatic/finished | —     | MFS transporter, DHA2 family, multidrug resistance protein          |
| FUMID1_v1_10432  | 448767  | 449783  | automatic/finished | —     | AraC-like DNA-binding protein                                       |
| FUMID1_v1_10433  | 449967  | 450782  | automatic/finished | —     | Short-chain dehydrogenase/reductase                                 |
| FUMID1_v1_10434  | 451134  | 451766  | automatic/finished | —     | DNA-binding transcriptional regulator, AcrR family                  |
| FUMID1_v1_10438  | 454104  | 455249  | automatic/finished | —     | Ferritin-like domain-containing protein                             |
| FUMID1_v1_10439  | 455575  | 455754  | automatic/finished | —     | protein of unknown function                                         |
| FUMID1_v1_10440  | 455747  | 456409  | automatic/finished | —     | GNAT family N-acetyltransferase                                     |
| FUMID1_v1_10441  | 456406  | 458166  | automatic/finished | —     | Histidine decarboxylase                                             |
| FUMID1_v1_10442  | 458692  | 458967  | automatic/finished | —     | protein of unknown function                                         |
| FUMID1_v1_10443  | 458459  | 458647  | automatic/finished | —     | protein of unknown function                                         |
| FUMID1_v1_10448  | 462057  | 463844  | automatic/finished | —     | cellulose synthase (UDP-forming)                                    |
| FUMID1_v1_10451  | 465248  | 467041  | automatic/finished | yjcS  | putative alkyl/aryl-sulfatase YjcS                                  |
| FUMID1_v1_10452  | 467164  | 469074  | automatic/finished | —     | phosphoserine phosphatase RsbU/P                                    |
| FUMID1_v1_10454  | 469829  | 471364  | automatic/finished | —     | Histidine kinase                                                    |
| FUMID1_v1_10457  | 475237  | 479217  | automatic/finished | purL  | phosphoribosylformylglycinamide synthetase                          |
| FUMID1_v1_10458  | 479173  | 480711  | automatic/finished | bexJ  | putative transporter                                                |
| FUMID1_v1_10460  | 481484  | 482173  | automatic/finished | —     | TetR family transcriptional regulator                               |
| FUMID1_v1_10465  | 487577  | 487723  | automatic/finished | —     | protein of unknown function                                         |
| FUMID1_v1_10467  | 489862  | 490581  | automatic/finished | def   | Peptide deformylase 1                                               |
| FUMID1_v1_10487  | 510652  | 510909  | automatic/finished | —     | protein of unknown function                                         |
| FUMID1_v1_10493  | 516679  | 517617  | automatic/finished | —     | Ricin-type beta-trefoil lectin domain-containing protein            |
| FUMID1_v1_10494  | 517610  | 519310  | automatic/finished | —     | conserved protein of unknown function                               |
| FUMID1_v1_10495  | 519307  | 524043  | automatic/finished | —     | DNA segregation ATPase FtsK/SpoIIIE, S-DNA-T family                 |
| FUMID1_v1_10496  | 524061  | 524375  | automatic/finished | —     | WXG100 family type VII secretion target                             |
| FUMID1_v1_10497  | 524408  | 524701  | automatic/finished | —     | conserved protein of unknown function                               |
| FUMID1_v1_10498  | 524763  | 525776  | automatic/finished | —     | conserved protein of unknown function                               |
| FUMID1_v1_10499  | 525978  | 530306  | automatic/finished | —     | protein of unknown function                                         |
| FUMID1_v1_10500  | 530401  | 534039  | automatic/finished | —     | protein of unknown function                                         |
| FUMID1_v1_10503  | 537300  | 537935  | automatic/finished | sigL  | ECF RNA polymerase sigma factor SigL                                |
| FUMID1_v1_10505  | 539303  | 539773  | automatic/finished | —     | protein of unknown function                                         |
| FUMID1_v1_110003 | 3098582 | 3098842 | automatic/finished | —     | protein of unknown function                                         |
| FUMID1_v1_110004 | 3099196 | 3099279 | automatic/finished | —     | protein of unknown function                                         |
| FUMID1_v1_110005 | 3099569 | 3100981 | automatic/finished | —     | conserved protein of unknown function                               |
| FUMID1_v1_110006 | 3101000 | 3101782 | automatic/finished | —     | Enoyl-CoA hydratase                                                 |
| FUMID1_v1_110007 | 3101947 | 3103323 | automatic/finished | —     | Major Facilitator Superfamily protein                               |
| FUMID1_v1_110008 | 3103389 | 3104708 | automatic/finished | —     | ATP-grasp domain-containing protein                                 |
| FUMID1_v1_110009 | 3104705 | 3105964 | automatic/finished | —     | ATP-grasp domain-containing protein                                 |
| FUMID1_v1_110010 | 3105961 | 3107283 | automatic/finished | —     | ATP-grasp domain-containing protein                                 |
| FUMID1_v1_110011 | 3107323 | 3108078 | automatic/finished | —     | conserved protein of unknown function                               |
| FUMID1_v1_110012 | 3108130 | 3108402 | automatic/finished | —     | Ferredoxin                                                          |
| FUMID1_v1_110013 | 3109092 | 3111524 | automatic/finished | —     | formyl-CoA transferase                                              |
| FUMID1_v1_110014 | 3111521 | 3112471 | automatic/finished | —     | Luciferase-like monooxygenase                                       |
| FUMID1_v1_110016 | 3114311 | 3115915 | automatic/finished | aknOx | Aclacinomycin-N/aclacinomycin-A oxidase                             |
| FUMID1_v1_110018 | 3116915 | 3117109 | automatic/finished | —     | protein of unknown function                                         |
| FUMID1_v1_110019 | 3117259 | 3118581 | automatic/finished | —     | Branched-chain amino acid ABC transporter substrate-binding protein |
| FUMID1_v1_110020 | 3118780 | 3119091 | automatic/finished | —     | Quinol monooxygenase YgiN                                           |
| FUMID1_v1_110022 | 3120108 | 3121073 | automatic/finished | —     | 3-oxoacyl-ACP reductase                                             |
| FUMID1_v1_110023 | 3121240 | 3122130 | automatic/finished | —     | protein of unknown function                                         |
| FUMID1_v1_110025 | 3123085 | 3123951 | automatic/finished | —     | acyl-CoA thioesterase II                                            |
| FUMID1_v1_110026 | 3123970 | 3125109 | automatic/finished | —     | putative epoxide hydrolase                                          |
| FUMID1_v1_110033 | 3130492 | 3130575 | automatic/finished | —     | protein of unknown function                                         |
| FUMID1_v1_110034 | 3130542 | 3131945 | automatic/finished | cotB  | Cyclooctat-9-en-7-ol 5-monooxygenase                                |
| FUMID1_v1_110035 | 3131954 | 3133198 | automatic/finished | —     | conserved protein of unknown function                               |
| FUMID1_v1_110036 | 3133164 | 3133562 | automatic/finished | —     | protein of unknown function                                         |

|                   |         |         |                    |      |                                                                            |
|-------------------|---------|---------|--------------------|------|----------------------------------------------------------------------------|
| FUMID1_v1_110052  | 3151402 | 3153054 | automatic/finished | —    | Carboxylic ester hydrolase                                                 |
| FUMID1_v1_110053  | 3153299 | 3153514 | automatic/finished | —    | protein of unknown function                                                |
| FUMID1_v1_110054  | 3153649 | 3153963 | automatic/finished | —    | exported protein of unknown function                                       |
| FUMID1_v1_110055  | 3153960 | 3154673 | automatic/finished | —    | protein of unknown function                                                |
| FUMID1_v1_110056  | 3155191 | 3155811 | automatic/finished | —    | protein of unknown function                                                |
| FUMID1_v1_110057  | 3154670 | 3155326 | automatic/finished | —    | exported protein of unknown function                                       |
| FUMID1_v1_110066  | 3165639 | 3165722 | automatic/finished | —    | protein of unknown function                                                |
| FUMID1_v1_110067  | 3165728 | 3167020 | automatic/finished | —    | Branched-chain amino acid ABC transporter substrate-binding protein        |
| FUMID1_v1_110069  | 3168314 | 3169801 | automatic/finished | —    | bile acid-coenzyme A ligase                                                |
| FUMID1_v1_110072  | 3171982 | 3172227 | automatic/finished | —    | protein of unknown function                                                |
| FUMID1_v1_110073  | 3172200 | 3172796 | automatic/finished | —    | protein of unknown function                                                |
| FUMID1_v1_110075  | 3173544 | 3173810 | automatic/finished | —    | protein of unknown function                                                |
| FUMID1_v1_110093  | 3188422 | 3189228 | automatic/finished | —    | O-methyltransferase                                                        |
| FUMID1_v1_110094  | 3189256 | 3190743 | automatic/finished | —    | Baeyer-Villiger monooxygenase                                              |
| FUMID1_v1_110095  | 3190791 | 3191273 | automatic/finished | —    | conserved protein of unknown function                                      |
| FUMID1_v1_110096  | 3191373 | 3192221 | automatic/finished | —    | TetR/AcrR family transcriptional regulator, tetracycline repressor protein |
| FUMID1_v1_110103  | 3198981 | 3199307 | automatic/finished | —    | conserved protein of unknown function                                      |
| FUMID1_v1_110106  | 3200220 | 3201011 | automatic/finished | —    | protein of unknown function                                                |
| FUMID1_v1_110110  | 3208239 | 3208856 | automatic/finished | —    | conserved protein of unknown function                                      |
| FUMID1_v1_110111  | 3208929 | 3211916 | automatic/finished | —    | Transcriptional regulator, LuxR family                                     |
| FUMID1_v1_110113  | 3213788 | 3214633 | automatic/finished | sadH | putative oxidoreductase SadH                                               |
| FUMID1_v1_110120  | 3219757 | 3219903 | automatic/finished | —    | protein of unknown function                                                |
| FUMID1_v1_110122  | 3221232 | 3221351 | automatic/finished | —    | protein of unknown function                                                |
| FUMID1_v1_110124  | 3222630 | 3222857 | automatic/finished | —    | protein of unknown function                                                |
| FUMID1_v1_110139  | 3237821 | 3238630 | automatic/finished | —    | Short-chain dehydrogenase                                                  |
| FUMID1_v1_110142  | 3241031 | 3244198 | automatic/finished | —    | DNA helicase                                                               |
| FUMID1_v1_110144  | 3244195 | 3247371 | automatic/finished | —    | protein of unknown function                                                |
| FUMID1_v1_110145  | 3248097 | 3248375 | automatic/finished | —    | protein of unknown function                                                |
| FUMID1_v1_110147  | 3248375 | 3252085 | automatic/finished | —    | Helicase conserved C-terminal domain-containing protein                    |
| FUMID1_v1_110148  | 3252087 | 3254201 | automatic/finished | —    | conserved protein of unknown function                                      |
| FUMID1_v1_110150  | 3255116 | 3255382 | automatic/finished | —    | protein of unknown function                                                |
| FUMID1_v1_110154  | 3259299 | 3259892 | automatic/finished | —    | protein of unknown function                                                |
| FUMID1_v1_110155  | 3259787 | 3260179 | automatic/finished | —    | protein of unknown function                                                |
| FUMID1_v1_110156  | 3260469 | 3260612 | automatic/finished | —    | protein of unknown function                                                |
| FUMID1_v1_110159  | 3261602 | 3262309 | automatic/finished | —    | protein of unknown function                                                |
| FUMID1_v1_110165  | 3266320 | 3267639 | automatic/finished | —    | diacylglycerol O-acyltransferase / wax synthase                            |
| FUMID1_v1_110167  | 3268072 | 3268725 | automatic/finished | —    | exported protein of unknown function                                       |
| FUMID1_v1_110169  | 3270025 | 3271080 | automatic/finished | —    | 4HBT domain-containing protein                                             |
| FUMID1_v1_110170  | 3270548 | 3271237 | automatic/finished | —    | protein of unknown function                                                |
| FUMID1_v1_110176  | 3276886 | 3277380 | automatic/finished | —    | NUDIX hydrolase                                                            |
| FUMID1_v1_110178  | 3277736 | 3278245 | automatic/finished | —    | protein of unknown function                                                |
| FUMID1_v1_1110001 | 6424065 | 6424658 | automatic/finished | —    | protein of unknown function                                                |
| FUMID1_v1_1120003 | 6425236 | 6425367 | automatic/finished | —    | protein of unknown function                                                |
| FUMID1_v1_1130001 | 6425488 | 6425982 | automatic/finished | —    | protein of unknown function                                                |
| FUMID1_v1_1140001 | 6426077 | 6426457 | automatic/finished | —    | protein of unknown function                                                |
| FUMID1_v1_1140002 | 6426504 | 6426581 | automatic/finished | —    | protein of unknown function                                                |
| FUMID1_v1_1170001 | 6428012 | 6428365 | automatic/finished | —    | protein of unknown function                                                |
| FUMID1_v1_120008  | 3293521 | 3293649 | automatic/finished | —    | protein of unknown function                                                |
| FUMID1_v1_120009  | 3293784 | 3294353 | automatic/finished | —    | protein of unknown function                                                |
| FUMID1_v1_120010  | 3293966 | 3294730 | automatic/finished | —    | lysozyme                                                                   |
| FUMID1_v1_120022  | 3308971 | 3309186 | automatic/finished | —    | protein of unknown function                                                |
| FUMID1_v1_120031  | 3318173 | 3318370 | automatic/finished | —    | conserved protein of unknown function                                      |
| FUMID1_v1_120070  | 3363627 | 3365147 | automatic/finished | —    | Protein kinase domain-containing protein                                   |
| FUMID1_v1_120076  | 3370394 | 3370636 | automatic/finished | —    | protein of unknown function                                                |
| FUMID1_v1_120077  | 3370728 | 3370997 | automatic/finished | —    | protein of unknown function                                                |
| FUMID1_v1_120078  | 3370909 | 3371337 | automatic/finished | —    | protein of unknown function                                                |
| FUMID1_v1_120080  | 3371274 | 3371984 | automatic/finished | —    | protein of unknown function                                                |
| FUMID1_v1_120084  | 3374094 | 3376409 | automatic/finished | —    | conserved protein of unknown function                                      |
| FUMID1_v1_120085  | 3376418 | 3377284 | automatic/finished | —    | protein of unknown function                                                |
| FUMID1_v1_120086  | 3377247 | 3377753 | automatic/finished | —    | protein of unknown function                                                |
| FUMID1_v1_120087  | 3377605 | 3377853 | automatic/finished | —    | protein of unknown function                                                |
| FUMID1_v1_120096  | 3384250 | 3385866 | automatic/finished | —    | MFS transporter                                                            |
| FUMID1_v1_120104  | 3393661 | 3395544 | automatic/finished | —    | conserved protein of unknown function                                      |
| FUMID1_v1_120105  | 3395545 | 3396474 | automatic/finished | —    | eukaryotic-like serine/threonine-protein kinase                            |
| FUMID1_v1_120109  | 3399539 | 3399784 | automatic/finished | —    | conserved protein of unknown function                                      |
| FUMID1_v1_120111  | 3400525 | 3401442 | automatic/finished | —    | conserved protein of unknown function                                      |
| FUMID1_v1_120113  | 3402554 | 3402997 | automatic/finished | —    | conserved protein of unknown function                                      |
| FUMID1_v1_120115  | 3403015 | 3403215 | automatic/finished | —    | protein of unknown function                                                |
| FUMID1_v1_120124  | 3413395 | 3414138 | automatic/finished | —    | protein of unknown function                                                |

|                   |         |         |                    |      |                                                                                       |
|-------------------|---------|---------|--------------------|------|---------------------------------------------------------------------------------------|
| FUMID1_v1_120128  | 3417626 | 3417715 | automatic/finished | _    | protein of unknown function                                                           |
| FUMID1_v1_120140  | 3428705 | 3429823 | automatic/finished | _    | conserved protein of unknown function                                                 |
| FUMID1_v1_120143  | 3432263 | 3432508 | automatic/finished | _    | protein of unknown function                                                           |
| FUMID1_v1_120158  | 3447931 | 3448452 | automatic/finished | _    | protein of unknown function                                                           |
| FUMID1_v1_130007  | 3457090 | 3457995 | automatic/finished | _    | MDMPI_N domain-containing protein                                                     |
| FUMID1_v1_130008  | 3457985 | 3458830 | automatic/finished | _    | Short-chain dehydrogenase                                                             |
| FUMID1_v1_130010  | 3458945 | 3459646 | automatic/finished | _    | periplasmic copper chaperone A                                                        |
| FUMID1_v1_130012  | 3461869 | 3461985 | automatic/finished | _    | protein of unknown function                                                           |
| FUMID1_v1_130014  | 3462087 | 3462827 | automatic/finished | _    | conserved protein of unknown function                                                 |
| FUMID1_v1_130016  | 3463198 | 3464037 | automatic/finished | _    | Acyl-CoA dehydrogenase                                                                |
| FUMID1_v1_130017  | 3464041 | 3465129 | automatic/finished | _    | Alkylation response protein AidB-like acyl-CoA dehydrogenase                          |
| FUMID1_v1_130020  | 3466600 | 3466674 | automatic/finished | _    | protein of unknown function                                                           |
| FUMID1_v1_130021  | 3466696 | 3467625 | automatic/finished | _    | conserved membrane protein of unknown function                                        |
| FUMID1_v1_130022  | 3467829 | 3468236 | automatic/finished | _    | protein of unknown function                                                           |
| FUMID1_v1_130024  | 3470380 | 3471477 | automatic/finished | _    | Phosphotransferase enzyme family protein                                              |
| FUMID1_v1_130029  | 3476053 | 3476898 | automatic/finished | _    | protein of unknown function                                                           |
| FUMID1_v1_130033  | 3482023 | 3482955 | automatic/finished | _    | putative membrane protein                                                             |
| FUMID1_v1_130034  | 3483999 | 3485231 | automatic/finished | _    | benzoate membrane transport protein                                                   |
| FUMID1_v1_130038  | 3486405 | 3487223 | automatic/finished | _    | conserved protein of unknown function                                                 |
| FUMID1_v1_130039  | 3487266 | 3488198 | automatic/finished | _    | protein of unknown function                                                           |
| FUMID1_v1_130045  | 3493182 | 3493373 | automatic/finished | _    | protein of unknown function                                                           |
| FUMID1_v1_130053  | 3497189 | 3498445 | automatic/finished | _    | Septum_form domain-containing protein                                                 |
| FUMID1_v1_130054  | 3498646 | 3498948 | automatic/finished | _    | protein of unknown function                                                           |
| FUMID1_v1_130057  | 3499648 | 3499797 | automatic/finished | _    | protein of unknown function                                                           |
| FUMID1_v1_130058  | 3499809 | 3500564 | automatic/finished | _    | conserved protein of unknown function                                                 |
| FUMID1_v1_130059  | 3500567 | 3500878 | automatic/finished | _    | conserved protein of unknown function                                                 |
| FUMID1_v1_130060  | 3500869 | 3500979 | automatic/finished | _    | protein of unknown function                                                           |
| FUMID1_v1_130061  | 3500957 | 3501796 | automatic/finished | _    | protein of unknown function                                                           |
| FUMID1_v1_130115  | 3551129 | 3551515 | automatic/finished | _    | protein of unknown function                                                           |
| FUMID1_v1_130118  | 3553010 | 3553204 | automatic/finished | _    | protein of unknown function                                                           |
| FUMID1_v1_130128  | 3561877 | 3561969 | automatic/finished | _    | protein of unknown function                                                           |
| FUMID1_v1_130139  | 3570715 | 3571218 | automatic/finished | _    | Nuclear transport factor 2 family protein                                             |
| FUMID1_v1_130142  | 3572819 | 3573715 | automatic/finished | _    | Esterase                                                                              |
| FUMID1_v1_130143  | 3573858 | 3574301 | automatic/finished | cynS | Cyanate hydratase                                                                     |
| FUMID1_v1_130147  | 3577512 | 3577898 | automatic/finished | _    | conserved exported protein of unknown function                                        |
| FUMID1_v1_130154  | 3583530 | 3586181 | automatic/finished | yppS | putative PEP-dependent enzyme                                                         |
| FUMID1_v1_130155  | 3586178 | 3586699 | automatic/finished | _    | conserved protein of unknown function                                                 |
| FUMID1_v1_130158  | 3588251 | 3589252 | automatic/finished | _    | conserved exported protein of unknown function                                        |
| FUMID1_v1_130159  | 3589026 | 3589385 | automatic/finished | _    | protein of unknown function                                                           |
| FUMID1_v1_130160  | 3589410 | 3589847 | automatic/finished | _    | DNA-binding transcriptional regulator, MarR family                                    |
| FUMID1_v1_130161  | 3589856 | 3591499 | automatic/finished | _    | conserved protein of unknown function                                                 |
| FUMID1_v1_130162  | 3591255 | 3591629 | automatic/finished | _    | protein of unknown function                                                           |
| FUMID1_v1_1360001 | 6435986 | 6436252 | automatic/finished | _    | protein of unknown function                                                           |
| FUMID1_v1_1390001 | 6437114 | 6437329 | automatic/finished | _    | protein of unknown function                                                           |
| FUMID1_v1_140014  | 3608298 | 3609290 | automatic/finished | _    | conserved exported protein of unknown function                                        |
| FUMID1_v1_140019  | 3613046 | 3615457 | automatic/finished | _    | putative drug exporter of the RND superfamily                                         |
| FUMID1_v1_140021  | 3616308 | 3617207 | automatic/finished | _    | conserved membrane protein of unknown function                                        |
| FUMID1_v1_140027  | 3621825 | 3622619 | automatic/finished | _    | Predicted DNA-binding transcriptional regulator YafY, contains an HTH and WYL domains |
| FUMID1_v1_140029  | 3622816 | 3623196 | automatic/finished | _    | VOC family protein                                                                    |
| FUMID1_v1_140043  | 3640708 | 3641091 | automatic/finished | _    | protein of unknown function                                                           |
| FUMID1_v1_140046  | 3642750 | 3643934 | automatic/finished | _    | conserved protein of unknown function                                                 |
| FUMID1_v1_140047  | 3643931 | 3645133 | automatic/finished | _    | Cytochrome P450                                                                       |
| FUMID1_v1_140048  | 3645141 | 3646301 | automatic/finished | _    | Acyl-CoA dehydrogenase                                                                |
| FUMID1_v1_140049  | 3646370 | 3647209 | automatic/finished | _    | Short-chain dehydrogenase                                                             |
| FUMID1_v1_140051  | 3647903 | 3648739 | automatic/finished | _    | exported protein of unknown function                                                  |
| FUMID1_v1_140054  | 3651646 | 3652572 | automatic/finished | _    | Luciferase-like monooxygenase                                                         |
| FUMID1_v1_140055  | 3652710 | 3653054 | automatic/finished | _    | membrane protein of unknown function                                                  |
| FUMID1_v1_140056  | 3653348 | 3653935 | automatic/finished | _    | Regulatory protein TetR                                                               |
| FUMID1_v1_140058  | 3654752 | 3654895 | automatic/finished | _    | protein of unknown function                                                           |
| FUMID1_v1_140077  | 3673740 | 3675068 | automatic/finished | _    | Branched-chain amino acid ABC transporter substrate-binding protein                   |
| FUMID1_v1_140078  | 3675150 | 3676508 | automatic/finished | _    | Carnitine dehydratase                                                                 |
| FUMID1_v1_140079  | 3676505 | 3677866 | automatic/finished | _    | benzylsuccinate CoA-transferase BbsF subunit                                          |
| FUMID1_v1_140080  | 3678070 | 3679329 | automatic/finished | _    | Amidohydrolase                                                                        |
| FUMID1_v1_140086  | 3682173 | 3683861 | automatic/finished | mig  | Medium-chain acyl-CoA ligase Mig                                                      |
| FUMID1_v1_140087  | 3683937 | 3684902 | automatic/finished | _    | LLM class F420-dependent oxidoreductase                                               |
| FUMID1_v1_140088  | 3684899 | 3685885 | automatic/finished | _    | protein of unknown function                                                           |
| FUMID1_v1_140095  | 3690340 | 3691050 | automatic/finished | _    | Alkyl hydroperoxide reductase                                                         |
| FUMID1_v1_140106  | 3703387 | 3704169 | automatic/finished | _    | protein-tyrosine phosphatase                                                          |
| FUMID1_v1_140108  | 3705582 | 3706067 | automatic/finished | _    | conserved protein of unknown function                                                 |

|                  |         |         |                    |      |                                                                     |
|------------------|---------|---------|--------------------|------|---------------------------------------------------------------------|
| FUMID1_v1_140113 | 3707406 | 3708245 | automatic/finished | —    | 3-oxoacyl-ACP reductase                                             |
| FUMID1_v1_140114 | 3708316 | 3709470 | automatic/finished | —    | flavin-dependent trigonelline monooxygenase, oxygenase component    |
| FUMID1_v1_140115 | 3709474 | 3709725 | automatic/finished | —    | protein of unknown function                                         |
| FUMID1_v1_140116 | 3709778 | 3710704 | automatic/finished | —    | conserved protein of unknown function                               |
| FUMID1_v1_140117 | 3711063 | 3711917 | automatic/finished | —    | epsilon-lactone hydrolase                                           |
| FUMID1_v1_140118 | 3712226 | 3712489 | automatic/finished | —    | protein of unknown function                                         |
| FUMID1_v1_140125 | 3718688 | 3719254 | automatic/finished | —    | protein of unknown function                                         |
| FUMID1_v1_140126 | 3719797 | 3720927 | automatic/finished | adhB | Alcohol dehydrogenase B                                             |
| FUMID1_v1_140129 | 3726050 | 3727297 | automatic/finished | —    | Branched-chain amino acid ABC transporter substrate-binding protein |
| FUMID1_v1_140130 | 3726390 | 3727310 | automatic/finished | —    | protein of unknown function                                         |
| FUMID1_v1_140133 | 3727972 | 3729216 | automatic/finished | —    | Branched-chain amino acid ABC transporter substrate-binding protein |
| FUMID1_v1_140134 | 3729768 | 3730433 | automatic/finished | —    | Transcriptional regulator, TetR family                              |
| FUMID1_v1_140135 | 3730490 | 3730933 | automatic/finished | —    | DUF393 domain-containing protein                                    |
| FUMID1_v1_140137 | 3732436 | 3734418 | automatic/finished | —    | Major facilitator superfamily MFS_1                                 |
| FUMID1_v1_140139 | 3735436 | 3736524 | automatic/finished | —    | dihydroflavonol-4-reductase                                         |
| FUMID1_v1_150006 | 3745199 | 3745408 | automatic/finished | —    | protein of unknown function                                         |
| FUMID1_v1_150011 | 3749699 | 3749971 | automatic/finished | —    | conserved protein of unknown function                               |
| FUMID1_v1_150012 | 3750215 | 3750364 | automatic/finished | —    | protein of unknown function                                         |
| FUMID1_v1_150016 | 3751917 | 3752108 | automatic/finished | —    | protein of unknown function                                         |
| FUMID1_v1_150020 | 3754710 | 3756977 | automatic/finished | —    | protein of unknown function                                         |
| FUMID1_v1_150022 | 3758854 | 3759243 | automatic/finished | —    | protein of unknown function                                         |
| FUMID1_v1_150028 | 3763968 | 3764303 | automatic/finished | —    | protein of unknown function                                         |
| FUMID1_v1_150032 | 3765142 | 3766143 | automatic/finished | —    | protein of unknown function                                         |
| FUMID1_v1_150040 | 3772722 | 3773000 | automatic/finished | —    | protein of unknown function                                         |
| FUMID1_v1_150052 | 3786662 | 3786904 | automatic/finished | —    | protein of unknown function                                         |
| FUMID1_v1_150076 | 3809544 | 3810722 | automatic/finished | —    | protein of unknown function                                         |
| FUMID1_v1_150087 | 3822027 | 3822551 | automatic/finished | —    | protein of unknown function                                         |
| FUMID1_v1_150102 | 3837697 | 3838446 | automatic/finished | —    | exported protein of unknown function                                |
| FUMID1_v1_150103 | 3838199 | 3838675 | automatic/finished | —    | protein of unknown function                                         |
| FUMID1_v1_150116 | 3854299 | 3854511 | automatic/finished | —    | protein of unknown function                                         |
| FUMID1_v1_150121 | 3859869 | 3860861 | automatic/finished | —    | protein of unknown function                                         |
| FUMID1_v1_150139 | 3880738 | 3880950 | automatic/finished | —    | protein of unknown function                                         |
| FUMID1_v1_150140 | 3881108 | 3881332 | automatic/finished | —    | conserved protein of unknown function                               |
| FUMID1_v1_150141 | 3881733 | 3882200 | automatic/finished | —    | protein of unknown function                                         |
| FUMID1_v1_150142 | 3882216 | 3884654 | automatic/finished | —    | AAA_16 domain-containing protein                                    |
| FUMID1_v1_160015 | 3897958 | 3898581 | automatic/finished | —    | conserved protein of unknown function                               |
| FUMID1_v1_160025 | 3909080 | 3909472 | automatic/finished | —    | conserved membrane protein of unknown function                      |
| FUMID1_v1_160028 | 3912045 | 3912971 | automatic/finished | —    | conserved protein of unknown function                               |
| FUMID1_v1_160029 | 3913292 | 3913792 | automatic/finished | —    | protein of unknown function                                         |
| FUMID1_v1_160044 | 3928378 | 3929022 | automatic/finished | —    | MDMPI_N domain-containing protein                                   |
| FUMID1_v1_160045 | 3929200 | 3929811 | automatic/finished | —    | Calcium-binding protein                                             |
| FUMID1_v1_160046 | 3929019 | 3929198 | automatic/finished | —    | protein of unknown function                                         |
| FUMID1_v1_160052 | 3931634 | 3932464 | automatic/finished | —    | protein of unknown function                                         |
| FUMID1_v1_160054 | 3932494 | 3933096 | automatic/finished | —    | conserved membrane protein of unknown function                      |
| FUMID1_v1_160061 | 3939175 | 3939876 | automatic/finished | —    | membrane protein of unknown function                                |
| FUMID1_v1_160062 | 3940456 | 3941319 | automatic/finished | —    | Hydrolase, alpha/beta fold family                                   |
| FUMID1_v1_160068 | 3943920 | 3944492 | automatic/finished | —    | conserved protein of unknown function                               |
| FUMID1_v1_160069 | 3944627 | 3945481 | automatic/finished | —    | Gluconolactonase                                                    |
| FUMID1_v1_160073 | 3949298 | 3950134 | automatic/finished | —    | Methyltransf_25 domain-containing protein                           |
| FUMID1_v1_160074 | 3950131 | 3951036 | automatic/finished | vgb  | Virginiamycin B lyase                                               |
| FUMID1_v1_160087 | 3962622 | 3963428 | automatic/finished | —    | Enoyl-CoA hydratase/isomerase                                       |
| FUMID1_v1_160091 | 3965999 | 3966454 | automatic/finished | —    | Cupin 2 conserved barrel domain protein                             |
| FUMID1_v1_160111 | 3981553 | 3982119 | automatic/finished | —    | conserved membrane protein of unknown function                      |
| FUMID1_v1_160119 | 3987760 | 3988431 | automatic/finished | lutC | Lactate utilization protein C                                       |
| FUMID1_v1_160145 | 4015589 | 4015792 | automatic/finished | —    | protein of unknown function                                         |
| FUMID1_v1_170001 | 4017222 | 4018346 | automatic/finished | —    | protein of unknown function                                         |
| FUMID1_v1_170003 | 4019410 | 4020261 | automatic/finished | —    | Alpha/beta hydrolase                                                |
| FUMID1_v1_170004 | 4020304 | 4020957 | automatic/finished | —    | TetR/AcrR family transcriptional regulator                          |
| FUMID1_v1_170016 | 4031567 | 4031989 | automatic/finished | —    | protein of unknown function                                         |
| FUMID1_v1_170021 | 4034985 | 4035485 | automatic/finished | —    | conserved membrane protein of unknown function                      |
| FUMID1_v1_170026 | 4040517 | 4040699 | automatic/finished | —    | protein of unknown function                                         |
| FUMID1_v1_170035 | 4054970 | 4057609 | automatic/finished | —    | eukaryotic-like serine/threonine-protein kinase                     |
| FUMID1_v1_170068 | 4093540 | 4094286 | automatic/finished | —    | N-acetyltransferase                                                 |
| FUMID1_v1_170076 | 4102296 | 4103513 | automatic/finished | —    | protein of unknown function                                         |
| FUMID1_v1_170086 | 4114272 | 4115414 | automatic/finished | —    | conserved membrane protein of unknown function                      |
| FUMID1_v1_170088 | 4116643 | 4116870 | automatic/finished | —    | protein of unknown function                                         |
| FUMID1_v1_170095 | 4125157 | 4125507 | automatic/finished | —    | protein of unknown function                                         |
| FUMID1_v1_170105 | 4138047 | 4138127 | automatic/finished | —    | protein of unknown function                                         |
| FUMID1_v1_170111 | 4142009 | 4142605 | automatic/finished | —    | Bifunctional deaminase-reductase domain protein                     |

|                  |         |         |                    |      |                                                                                             |
|------------------|---------|---------|--------------------|------|---------------------------------------------------------------------------------------------|
| FUMID1_v1_170112 | 4142637 | 4143455 | automatic/finished | —    | conserved protein of unknown function                                                       |
| FUMID1_v1_170113 | 4143655 | 4144029 | automatic/finished | —    | conserved protein of unknown function                                                       |
| FUMID1_v1_170114 | 4144175 | 4144597 | automatic/finished | —    | conserved membrane protein of unknown function                                              |
| FUMID1_v1_170118 | 4145720 | 4145920 | automatic/finished | —    | protein of unknown function                                                                 |
| FUMID1_v1_170120 | 4147033 | 4147788 | automatic/finished | —    | conserved exported protein of unknown function                                              |
| FUMID1_v1_170121 | 4147806 | 4148015 | automatic/finished | —    | protein of unknown function                                                                 |
| FUMID1_v1_180002 | 4150036 | 4151328 | automatic/finished | —    | conserved protein of unknown function                                                       |
| FUMID1_v1_180007 | 4155409 | 4155996 | automatic/finished | —    | protein of unknown function                                                                 |
| FUMID1_v1_180018 | 4165562 | 4167061 | automatic/finished | —    | conserved protein of unknown function                                                       |
| FUMID1_v1_180030 | 4175697 | 4176920 | automatic/finished | —    | Amidohydrolase 2                                                                            |
| FUMID1_v1_180037 | 4184798 | 4186234 | automatic/finished | —    | Repeat domain-containing protein                                                            |
| FUMID1_v1_180070 | 4224535 | 4224858 | automatic/finished | —    | exported protein of unknown function                                                        |
| FUMID1_v1_180075 | 4229529 | 4230737 | automatic/finished | —    | Predicted metal-dependent hydrolase, TIM-barrel fold                                        |
| FUMID1_v1_180077 | 4232347 | 4233210 | automatic/finished | —    | Alpha/beta fold hydrolase                                                                   |
| FUMID1_v1_180084 | 4240360 | 4240863 | automatic/finished | —    | conserved protein of unknown function                                                       |
| FUMID1_v1_180085 | 4240900 | 4244211 | automatic/finished | —    | Tetratricopeptide repeat/TIR domain-containing protein                                      |
| FUMID1_v1_180090 | 4251300 | 4252217 | automatic/finished | —    | Short-chain dehydrogenase                                                                   |
| FUMID1_v1_180091 | 4252340 | 4253113 | automatic/finished | —    | putative EthD domain-containing protein                                                     |
| FUMID1_v1_180092 | 4253168 | 4253836 | automatic/finished | —    | TetR/AcrR family transcriptional regulator                                                  |
| FUMID1_v1_180094 | 4256163 | 4257083 | automatic/finished | —    | conserved protein of unknown function                                                       |
| FUMID1_v1_180095 | 4257191 | 4257850 | automatic/finished | —    | TetR/AcrR family transcriptional regulator                                                  |
| FUMID1_v1_180102 | 4266647 | 4266874 | automatic/finished | —    | protein of unknown function                                                                 |
| FUMID1_v1_190001 | 4274076 | 4274651 | automatic/finished | —    | protein of unknown function                                                                 |
| FUMID1_v1_190021 | 4299197 | 4302073 | automatic/finished | —    | Signal transduction histidine kinase                                                        |
| FUMID1_v1_190046 | 4345440 | 4345661 | automatic/finished | —    | protein of unknown function                                                                 |
| FUMID1_v1_190055 | 4353983 | 4354177 | automatic/finished | —    | protein of unknown function                                                                 |
| FUMID1_v1_190056 | 4354165 | 4356057 | automatic/finished | —    | conserved protein of unknown function                                                       |
| FUMID1_v1_190072 | 4366052 | 4366432 | automatic/finished | —    | protein of unknown function                                                                 |
| FUMID1_v1_190073 | 4366770 | 4367009 | automatic/finished | —    | protein of unknown function                                                                 |
| FUMID1_v1_190082 | 4373152 | 4373385 | automatic/finished | —    | protein of unknown function                                                                 |
| FUMID1_v1_190086 | 4374764 | 4376167 | automatic/finished | —    | nicotinate phosphoribosyltransferase                                                        |
| FUMID1_v1_200007 | 4387786 | 4388022 | automatic/finished | —    | protein of unknown function                                                                 |
| FUMID1_v1_200008 | 4387994 | 4388398 | automatic/finished | —    | protein of unknown function                                                                 |
| FUMID1_v1_200013 | 4393990 | 4394262 | automatic/finished | —    | protein of unknown function                                                                 |
| FUMID1_v1_20002  | 551881  | 552825  | automatic/finished | —    | LysR family transcriptional regulator, nod-box dependent transcriptional activator          |
| FUMID1_v1_200024 | 4407511 | 4407906 | automatic/finished | —    | protein of unknown function                                                                 |
| FUMID1_v1_200029 | 4410630 | 4410968 | automatic/finished | —    | protein of unknown function                                                                 |
| FUMID1_v1_20003  | 553043  | 554323  | automatic/finished | xyoA | putative xylitol oxidase                                                                    |
| FUMID1_v1_200033 | 4414716 | 4415255 | automatic/finished | —    | conserved protein of unknown function                                                       |
| FUMID1_v1_200038 | 4420712 | 4420894 | automatic/finished | —    | protein of unknown function                                                                 |
| FUMID1_v1_200059 | 4442697 | 4443599 | automatic/finished | —    | Helix-turn-helix domain-containing protein                                                  |
| FUMID1_v1_200060 | 4443909 | 4445564 | automatic/finished | —    | AMP-dependent synthetase                                                                    |
| FUMID1_v1_200061 | 4445681 | 4446748 | automatic/finished | —    | Aminoglycoside phosphotransferase                                                           |
| FUMID1_v1_200062 | 4447244 | 4448452 | automatic/finished | —    | CoA transferase                                                                             |
| FUMID1_v1_200063 | 4448449 | 4449003 | automatic/finished | —    | conserved protein of unknown function                                                       |
| FUMID1_v1_200065 | 4449000 | 4450205 | automatic/finished | —    | Thiolase family protein                                                                     |
| FUMID1_v1_200066 | 4450300 | 4451769 | automatic/finished | —    | Aldehyde dehydrogenase family protein                                                       |
| FUMID1_v1_200067 | 4451873 | 4453093 | automatic/finished | —    | Amidohydrolase                                                                              |
| FUMID1_v1_200068 | 4453098 | 4453355 | automatic/finished | —    | ferredoxin                                                                                  |
| FUMID1_v1_200069 | 4453547 | 4454785 | automatic/finished | —    | Cytochrome P450                                                                             |
| FUMID1_v1_200070 | 4454822 | 4455265 | automatic/finished | ddn  | Deazaflavin-dependent nitroreductase                                                        |
| FUMID1_v1_200071 | 4455467 | 4456216 | automatic/finished | —    | protein of unknown function                                                                 |
| FUMID1_v1_200072 | 4456277 | 4457143 | automatic/finished | —    | Flavin-dependent oxidoreductase, F420-dependent methylene-tetrahydromethanopterin reductase |
| FUMID1_v1_200074 | 4458908 | 4459339 | automatic/finished | —    | conserved protein of unknown function                                                       |
| FUMID1_v1_200083 | 4473915 | 4474211 | automatic/finished | —    | protein of unknown function                                                                 |
| FUMID1_v1_200086 | 4475575 | 4479357 | automatic/finished | —    | AAA_27 domain-containing protein                                                            |
| FUMID1_v1_200087 | 4479359 | 4480588 | automatic/finished | —    | DNA repair protein SbcD/Mre11                                                               |
| FUMID1_v1_200089 | 4481202 | 4482263 | automatic/finished | —    | EndoU_bacteria domain-containing protein                                                    |
| FUMID1_v1_20010  | 559172  | 560059  | automatic/finished | —    | Universal stress protein UspA                                                               |
| FUMID1_v1_20012  | 560756  | 561598  | automatic/finished | —    | protein of unknown function                                                                 |
| FUMID1_v1_20014  | 561627  | 562526  | automatic/finished | —    | Zn-dependent protease with chaperone function                                               |
| FUMID1_v1_20018  | 567223  | 567606  | automatic/finished | —    | protein of unknown function                                                                 |
| FUMID1_v1_20019  | 567585  | 568223  | automatic/finished | —    | CBS domain-containing protein                                                               |
| FUMID1_v1_20021  | 569538  | 569714  | automatic/finished | —    | protein of unknown function                                                                 |
| FUMID1_v1_20025  | 572496  | 572909  | automatic/finished | —    | DUF4440 domain-containing protein                                                           |
| FUMID1_v1_20026  | 573092  | 573583  | automatic/finished | —    | DNA-binding transcriptional repressor MarR                                                  |
| FUMID1_v1_20027  | 573666  | 574202  | automatic/finished | —    | SnoaL-like domain protein                                                                   |
| FUMID1_v1_20031  | 577067  | 577240  | automatic/finished | —    | protein of unknown function                                                                 |
| FUMID1_v1_20054  | 597307  | 598050  | automatic/finished | —    | conserved protein of unknown function                                                       |

|                  |         |         |                    |      |                                                                                    |
|------------------|---------|---------|--------------------|------|------------------------------------------------------------------------------------|
| FUMID1_v1_20059  | 601057  | 602604  | automatic/finished | —    | Major facilitator superfamily MFS_1                                                |
| FUMID1_v1_20066  | 611483  | 612628  | automatic/finished | —    | Clp protease                                                                       |
| FUMID1_v1_20068  | 613062  | 614213  | automatic/finished | —    | Winged helix DNA-binding domain-containing protein                                 |
| FUMID1_v1_20075  | 624717  | 625934  | automatic/finished | —    | Peripla_BP_6 domain-containing protein                                             |
| FUMID1_v1_20077  | 626244  | 627149  | automatic/finished | ucpA | Oxidoreductase UcpA                                                                |
| FUMID1_v1_20079  | 628297  | 628959  | automatic/finished | —    | Regulatory protein TetR                                                            |
| FUMID1_v1_20080  | 629093  | 630337  | automatic/finished | cyp  | Methyl-branched lipid omega-hydroxylase                                            |
| FUMID1_v1_20081  | 630601  | 632364  | automatic/finished | —    | Diguanylate cyclase (GGDEF) domain-containing protein                              |
| FUMID1_v1_20102  | 656428  | 656820  | automatic/finished | —    | serine/threonine-protein kinase RsbW                                               |
| FUMID1_v1_20118  | 670019  | 670213  | automatic/finished | —    | protein of unknown function                                                        |
| FUMID1_v1_20164  | 706945  | 707859  | automatic/finished | —    | protein of unknown function                                                        |
| FUMID1_v1_20168  | 711790  | 711918  | automatic/finished | —    | protein of unknown function                                                        |
| FUMID1_v1_20171  | 714700  | 714891  | automatic/finished | —    | protein of unknown function                                                        |
| FUMID1_v1_20178  | 720991  | 721482  | automatic/finished | —    | protein of unknown function                                                        |
| FUMID1_v1_20199  | 744799  | 745203  | automatic/finished | —    | protein of unknown function                                                        |
| FUMID1_v1_20253  | 797834  | 799156  | automatic/finished | —    | conserved protein of unknown function                                              |
| FUMID1_v1_20261  | 807845  | 808111  | automatic/finished | —    | protein of unknown function                                                        |
| FUMID1_v1_20317  | 851117  | 852805  | automatic/finished | —    | conserved protein of unknown function                                              |
| FUMID1_v1_20345  | 877471  | 878883  | automatic/finished | —    | conserved protein of unknown function                                              |
| FUMID1_v1_20355  | 889052  | 889252  | automatic/finished | —    | protein of unknown function                                                        |
| FUMID1_v1_20357  | 891099  | 891386  | automatic/finished | —    | protein of unknown function                                                        |
| FUMID1_v1_210003 | 4484181 | 4484834 | automatic/finished | —    | protein of unknown function                                                        |
| FUMID1_v1_210013 | 4495856 | 4496743 | automatic/finished | —    | Alpha/beta hydrolase                                                               |
| FUMID1_v1_210025 | 4509819 | 4510541 | automatic/finished | —    | carboxymethylenebutenolidase                                                       |
| FUMID1_v1_210027 | 4510800 | 4511216 | automatic/finished | —    | protein of unknown function                                                        |
| FUMID1_v1_210059 | 4547811 | 4548278 | automatic/finished | —    | protein of unknown function                                                        |
| FUMID1_v1_210060 | 4548085 | 4548348 | automatic/finished | —    | protein of unknown function                                                        |
| FUMID1_v1_210074 | 4558734 | 4558928 | automatic/finished | —    | protein of unknown function                                                        |
| FUMID1_v1_210086 | 4571032 | 4571208 | automatic/finished | —    | protein of unknown function                                                        |
| FUMID1_v1_210093 | 4577280 | 4578146 | automatic/finished | —    | conserved protein of unknown function                                              |
| FUMID1_v1_220015 | 4593298 | 4594236 | automatic/finished | —    | TauD domain-containing protein                                                     |
| FUMID1_v1_220017 | 4595547 | 4596524 | automatic/finished | —    | ornithine carbamoyltransferase                                                     |
| FUMID1_v1_230002 | 4665682 | 4666653 | automatic/finished | —    | LysR family transcriptional regulator, nod-box dependent transcriptional activator |
| FUMID1_v1_230003 | 4666742 | 4667761 | automatic/finished | —    | aminocarboxymuconate-semialdehyde decarboxylase                                    |
| FUMID1_v1_230006 | 4669981 | 4671324 | automatic/finished | —    | Branched-chain amino acid ABC transporter substrate-binding protein                |
| FUMID1_v1_230010 | 4673057 | 4674028 | automatic/finished | —    | Kynurenine formamidase                                                             |
| FUMID1_v1_230016 | 4677285 | 4677422 | automatic/finished | —    | protein of unknown function                                                        |
| FUMID1_v1_230018 | 4678577 | 4680211 | automatic/finished | fadD | 3-[(3aS,4S,7aS)-7a-methyl-1,5-dioxo-octahydro-1H-inden-4-yl]propanoyl:CoA ligase   |
| FUMID1_v1_230019 | 4680494 | 4681252 | automatic/finished | —    | Thioesterase superfamily protein                                                   |
| FUMID1_v1_230020 | 4681302 | 4682018 | automatic/finished | —    | Regulatory protein TetR                                                            |
| FUMID1_v1_230024 | 4685765 | 4686772 | automatic/finished | —    | Acyl-CoA dehydrogenase                                                             |
| FUMID1_v1_230025 | 4686809 | 4687594 | automatic/finished | —    | citronellol/citronellal dehydrogenase                                              |
| FUMID1_v1_230027 | 4688123 | 4689106 | automatic/finished | —    | HTH_30 domain-containing protein                                                   |
| FUMID1_v1_230028 | 4689035 | 4689160 | automatic/finished | —    | protein of unknown function                                                        |
| FUMID1_v1_230029 | 4689338 | 4690279 | automatic/finished | —    | epsilon-lactone hydrolase                                                          |
| FUMID1_v1_230041 | 4696586 | 4697872 | automatic/finished | —    | 3-hydroxyisobutyrate dehydrogenase                                                 |
| FUMID1_v1_230042 | 4697921 | 4698775 | automatic/finished | —    | Short-chain dehydrogenase/reductase SDR                                            |
| FUMID1_v1_230044 | 4699257 | 4699937 | automatic/finished | —    | TetR/AcrR family transcriptional regulator                                         |
| FUMID1_v1_230045 | 4700035 | 4700691 | automatic/finished | —    | TetR family transcriptional regulator                                              |
| FUMID1_v1_230046 | 4700965 | 4701378 | automatic/finished | —    | SnoL-like domain-containing protein                                                |
| FUMID1_v1_230047 | 4701375 | 4702226 | automatic/finished | —    | NAD(P)-dependent dehydrogenase, short-chain alcohol dehydrogenase family           |
| FUMID1_v1_230060 | 4713804 | 4714361 | automatic/finished | —    | restriction system protein                                                         |
| FUMID1_v1_230061 | 4714316 | 4715083 | automatic/finished | —    | RNA polymerase sigma-70 factor, ECF subfamily                                      |
| FUMID1_v1_230062 | 4715080 | 4715343 | automatic/finished | —    | putative transmembrane anti-sigma factor                                           |
| FUMID1_v1_230065 | 4717839 | 4718723 | automatic/finished | —    | conserved membrane protein of unknown function                                     |
| FUMID1_v1_230067 | 4719536 | 4720906 | automatic/finished | —    | Integral membrane sensor signal transduction histidine kinase                      |
| FUMID1_v1_230068 | 4721124 | 4723199 | automatic/finished | —    | Multidrug ABC transporter permease                                                 |
| FUMID1_v1_230070 | 4723219 | 4724526 | automatic/finished | —    | exported protein of unknown function                                               |
| FUMID1_v1_230080 | 4731568 | 4731765 | automatic/finished | —    | protein of unknown function                                                        |
| FUMID1_v1_230084 | 4733412 | 4734833 | automatic/finished | —    | two-component system, NarL family, sensor histidine kinase DesK                    |
| FUMID1_v1_230088 | 4738230 | 4738553 | automatic/finished | —    | conserved protein of unknown function                                              |
| FUMID1_v1_230094 | 4746306 | 4749665 | automatic/finished | —    | protein of unknown function                                                        |
| FUMID1_v1_230095 | 4746906 | 4747157 | automatic/finished | —    | protein of unknown function                                                        |
| FUMID1_v1_240007 | 4754104 | 4756785 | automatic/finished | —    | Non-specific serine/threonine protein kinase                                       |
| FUMID1_v1_240022 | 4772651 | 4773949 | automatic/finished | —    | HNHc domain-containing protein                                                     |
| FUMID1_v1_240034 | 4785327 | 4785578 | automatic/finished | —    | conserved protein of unknown function                                              |
| FUMID1_v1_240035 | 4785575 | 4785781 | automatic/finished | —    | protein of unknown function                                                        |
| FUMID1_v1_240044 | 4795191 | 4795316 | automatic/finished | —    | protein of unknown function                                                        |
| FUMID1_v1_240059 | 4816424 | 4816993 | automatic/finished | —    | protein of unknown function                                                        |

|                  |         |         |                    |      |                                                                     |
|------------------|---------|---------|--------------------|------|---------------------------------------------------------------------|
| FUMID1_v1_240062 | 4820008 | 4820181 | automatic/finished | —    | protein of unknown function                                         |
| FUMID1_v1_250003 | 4832145 | 4832759 | automatic/finished | —    | HTH tetR-type domain-containing protein                             |
| FUMID1_v1_250005 | 4833566 | 4834075 | automatic/finished | —    | protein of unknown function                                         |
| FUMID1_v1_250007 | 4834036 | 4835049 | automatic/finished | —    | L-fuconolactonase                                                   |
| FUMID1_v1_250008 | 4835162 | 4836367 | automatic/finished | cyp  | Cytochrome P450-terp                                                |
| FUMID1_v1_250016 | 4843093 | 4844031 | automatic/finished | —    | Short-chain dehydrogenase                                           |
| FUMID1_v1_250017 | 4844628 | 4846241 | automatic/finished | —    | MFS domain-containing protein                                       |
| FUMID1_v1_250019 | 4846739 | 4847971 | automatic/finished | —    | ABC transporter substrate-binding protein                           |
| FUMID1_v1_250020 | 4847826 | 4848038 | automatic/finished | —    | protein of unknown function                                         |
| FUMID1_v1_250029 | 4855759 | 4856031 | automatic/finished | —    | protein of unknown function                                         |
| FUMID1_v1_250037 | 4859703 | 4861838 | automatic/finished | —    | Uncharacterized peptidase y4nA                                      |
| FUMID1_v1_250038 | 4861801 | 4862274 | automatic/finished | —    | exported protein of unknown function                                |
| FUMID1_v1_250041 | 4864995 | 4866317 | automatic/finished | —    | GAF domain-containing protein                                       |
| FUMID1_v1_250046 | 4869380 | 4870372 | automatic/finished | —    | protein of unknown function                                         |
| FUMID1_v1_250048 | 4870338 | 4870631 | automatic/finished | —    | protein of unknown function                                         |
| FUMID1_v1_250049 | 4871731 | 4872840 | automatic/finished | —    | Luciferase family protein                                           |
| FUMID1_v1_250055 | 4895789 | 4896871 | automatic/finished | —    | esterase FrsA                                                       |
| FUMID1_v1_250059 | 4899952 | 4900791 | automatic/finished | —    | peptide/nickel transport system permease protein                    |
| FUMID1_v1_250060 | 4900788 | 4901762 | automatic/finished | —    | peptide/nickel transport system permease protein                    |
| FUMID1_v1_250061 | 4901769 | 4903340 | automatic/finished | —    | peptide/nickel transport system substrate-binding protein           |
| FUMID1_v1_250062 | 4903376 | 4904734 | automatic/finished | scmK | N-acetyl-S-(2-succino)cysteine monooxygenase                        |
| FUMID1_v1_250065 | 4907905 | 4908945 | automatic/finished | —    | flavin-dependent trigonelline monooxygenase, oxygenase component    |
| FUMID1_v1_250066 | 4909028 | 4911022 | automatic/finished | —    | protein of unknown function                                         |
| FUMID1_v1_260001 | 4911362 | 4911808 | automatic/finished | —    | exported protein of unknown function                                |
| FUMID1_v1_260021 | 4935181 | 4935375 | automatic/finished | —    | protein of unknown function                                         |
| FUMID1_v1_260023 | 4935369 | 4935548 | automatic/finished | —    | protein of unknown function                                         |
| FUMID1_v1_260028 | 4941461 | 4941775 | automatic/finished | —    | conserved membrane protein of unknown function                      |
| FUMID1_v1_260032 | 4946921 | 4947724 | automatic/finished | —    | exported protein of unknown function                                |
| FUMID1_v1_260042 | 4955043 | 4955432 | automatic/finished | —    | protein of unknown function                                         |
| FUMID1_v1_260068 | 4984771 | 4984971 | automatic/finished | —    | protein of unknown function                                         |
| FUMID1_v1_270001 | 4985733 | 4985933 | automatic/finished | —    | protein of unknown function                                         |
| FUMID1_v1_270003 | 4987278 | 4987922 | automatic/finished | —    | N-acetyltransferase                                                 |
| FUMID1_v1_270004 | 4988002 | 4988202 | automatic/finished | —    | protein of unknown function                                         |
| FUMID1_v1_270007 | 4989937 | 4990233 | automatic/finished | —    | protein of unknown function                                         |
| FUMID1_v1_270008 | 4990003 | 4990224 | automatic/finished | —    | exported protein of unknown function                                |
| FUMID1_v1_270021 | 4998385 | 4999578 | automatic/finished | —    | cytochrome P450 family 130                                          |
| FUMID1_v1_270022 | 4999718 | 5000314 | automatic/finished | —    | TetR family transcriptional regulator                               |
| FUMID1_v1_270025 | 5003352 | 5004530 | automatic/finished | xylA | Xylose isomerase                                                    |
| FUMID1_v1_270026 | 5004544 | 5005986 | automatic/finished | xylB | Xylulose kinase                                                     |
| FUMID1_v1_270041 | 5018685 | 5020619 | automatic/finished | —    | protein of unknown function                                         |
| FUMID1_v1_270042 | 5020708 | 5021529 | automatic/finished | —    | protein of unknown function                                         |
| FUMID1_v1_270043 | 5021526 | 5029220 | automatic/finished | —    | protein of unknown function                                         |
| FUMID1_v1_270044 | 5028113 | 5029678 | automatic/finished | —    | protein of unknown function                                         |
| FUMID1_v1_270046 | 5029929 | 5030228 | automatic/finished | —    | conserved protein of unknown function                               |
| FUMID1_v1_270047 | 5030225 | 5031409 | automatic/finished | —    | Transporter (CPA2 family)                                           |
| FUMID1_v1_270049 | 5032255 | 5033067 | automatic/finished | —    | Enoyl-CoA hydratase/isomerase                                       |
| FUMID1_v1_270050 | 5033454 | 5033582 | automatic/finished | —    | protein of unknown function                                         |
| FUMID1_v1_270056 | 5037857 | 5038753 | automatic/finished | —    | xylono-1,5-lactonase                                                |
| FUMID1_v1_270057 | 5038750 | 5040336 | automatic/finished | —    | Alpha-ketoglutaric semialdehyde dehydrogenase 2                     |
| FUMID1_v1_270058 | 5040381 | 5041433 | automatic/finished | —    | Alcohol dehydrogenase GroES domain protein                          |
| FUMID1_v1_270059 | 5041470 | 5042651 | automatic/finished | —    | galactonate dehydratase                                             |
| FUMID1_v1_270060 | 5042648 | 5043634 | automatic/finished | —    | Peptidase family U32                                                |
| FUMID1_v1_270061 | 5043922 | 5045076 | automatic/finished | —    | Lacl family transcriptional regulator                               |
| FUMID1_v1_270063 | 5046449 | 5047042 | automatic/finished | —    | AAA family ATPase                                                   |
| FUMID1_v1_270064 | 5047147 | 5048595 | automatic/finished | —    | Exo-alpha-sialidase                                                 |
| FUMID1_v1_270065 | 5048594 | 5048701 | automatic/finished | —    | protein of unknown function                                         |
| FUMID1_v1_270067 | 5049481 | 5050071 | automatic/finished | —    | TetR family transcriptional regulator                               |
| FUMID1_v1_270068 | 5050148 | 5051464 | automatic/finished | —    | Branched-chain amino acid ABC transporter substrate-binding protein |
| FUMID1_v1_270073 | 5052241 | 5053977 | automatic/finished | bgxA | Beta-glucosidase / Beta-xylosidase                                  |
| FUMID1_v1_270074 | 5054013 | 5054642 | automatic/finished | —    | protein of unknown function                                         |
| FUMID1_v1_280016 | 5070098 | 5070760 | automatic/finished | —    | conserved exported protein of unknown function                      |
| FUMID1_v1_280026 | 5083228 | 5083686 | automatic/finished | —    | protein of unknown function                                         |
| FUMID1_v1_280027 | 5083724 | 5084512 | automatic/finished | —    | TetR family transcriptional regulator                               |
| FUMID1_v1_280028 | 5084670 | 5085491 | automatic/finished | —    | Short-chain dehydrogenase/reductase SDR                             |
| FUMID1_v1_280029 | 5085544 | 5086350 | automatic/finished | fabG | 3-alpha-(or 20-beta)-hydroxysteroid dehydrogenase                   |
| FUMID1_v1_280040 | 5098567 | 5098917 | automatic/finished | —    | protein of unknown function                                         |
| FUMID1_v1_280051 | 5107920 | 5110661 | automatic/finished | —    | putative Diguanylate cyclase/phosphodiesterase                      |
| FUMID1_v1_280055 | 5113995 | 5114621 | automatic/finished | —    | Thioesterase superfamily enzyme                                     |
| FUMID1_v1_290002 | 5120923 | 5121699 | automatic/finished | fabG | 3-alpha-(or 20-beta)-hydroxysteroid dehydrogenase                   |



|                  |         |         |                    |      |                                                                   |
|------------------|---------|---------|--------------------|------|-------------------------------------------------------------------|
| FUMID1_v1_290004 | 5122059 | 5122397 | automatic/finished | —    | protein of unknown function                                       |
| FUMID1_v1_290011 | 5129645 | 5130988 | automatic/finished | —    | HNHc domain-containing protein                                    |
| FUMID1_v1_290015 | 5138838 | 5139947 | automatic/finished | —    | conserved protein of unknown function                             |
| FUMID1_v1_290021 | 5144197 | 5145069 | automatic/finished | —    | exported protein of unknown function                              |
| FUMID1_v1_290025 | 5149535 | 5150305 | automatic/finished | —    | SARP family transcriptional regulator, regulator of embCAB operon |
| FUMID1_v1_290026 | 5150555 | 5150872 | automatic/finished | —    | protein of unknown function                                       |
| FUMID1_v1_290028 | 5151600 | 5151803 | automatic/finished | —    | protein of unknown function                                       |
| FUMID1_v1_290029 | 5151835 | 5152035 | automatic/finished | —    | protein of unknown function                                       |
| FUMID1_v1_290040 | 5161877 | 5162272 | automatic/finished | —    | putative Transcriptional regulator Blal                           |
| FUMID1_v1_290041 | 5162845 | 5163966 | automatic/finished | —    | Peptidase_M48 domain-containing protein                           |
| FUMID1_v1_290047 | 5171142 | 5172188 | automatic/finished | —    | iron complex transport system substrate-binding protein           |
| FUMID1_v1_30005  | 919341  | 919553  | automatic/finished | —    | exported protein of unknown function                              |
| FUMID1_v1_30030  | 946953  | 948926  | automatic/finished | —    | Calpain catalytic domain-containing protein                       |
| FUMID1_v1_30035  | 955854  | 957002  | automatic/finished | —    | protein of unknown function                                       |
| FUMID1_v1_30038  | 957872  | 959011  | automatic/finished | —    | ElaA protein                                                      |
| FUMID1_v1_30073  | 990578  | 991183  | automatic/finished | —    | TetR family transcriptional regulator                             |
| FUMID1_v1_30074  | 991365  | 991919  | automatic/finished | —    | TetR/AcrR family transcriptional regulator                        |
| FUMID1_v1_30075  | 991950  | 992129  | automatic/finished | —    | protein of unknown function                                       |
| FUMID1_v1_30076  | 992285  | 994594  | automatic/finished | ydfJ | Membrane protein YdfJ                                             |
| FUMID1_v1_30077  | 994650  | 995306  | automatic/finished | —    | Transcriptional regulator                                         |
| FUMID1_v1_30081  | 1001190 | 1001315 | automatic/finished | —    | protein of unknown function                                       |
| FUMID1_v1_30087  | 1004935 | 1005363 | automatic/finished | —    | histidine triad (HIT) family protein                              |
| FUMID1_v1_30089  | 1005900 | 1006247 | automatic/finished | —    | protein of unknown function                                       |
| FUMID1_v1_30090  | 1006244 | 1006456 | automatic/finished | —    | protein of unknown function                                       |
| FUMID1_v1_30091  | 1006455 | 1007075 | automatic/finished | —    | conserved protein of unknown function                             |
| FUMID1_v1_30092  | 1007182 | 1007445 | automatic/finished | —    | protein of unknown function                                       |
| FUMID1_v1_30093  | 1007583 | 1007933 | automatic/finished | —    | protein of unknown function                                       |
| FUMID1_v1_30113  | 1026852 | 1027157 | automatic/finished | —    | protein of unknown function                                       |
| FUMID1_v1_30119  | 1033822 | 1034481 | automatic/finished | —    | protein of unknown function                                       |
| FUMID1_v1_30130  | 1049522 | 1050814 | automatic/finished | —    | conserved protein of unknown function                             |
| FUMID1_v1_30132  | 1050845 | 1051018 | automatic/finished | —    | protein of unknown function                                       |
| FUMID1_v1_30152  | 1075373 | 1076902 | automatic/finished | —    | exported protein of unknown function                              |
| FUMID1_v1_30153  | 1077096 | 1077641 | automatic/finished | —    | protein of unknown function                                       |
| FUMID1_v1_30154  | 1077696 | 1078757 | automatic/finished | —    | DNA adenine methylase                                             |
| FUMID1_v1_30155  | 1078786 | 1079925 | automatic/finished | —    | conserved protein of unknown function                             |
| FUMID1_v1_30181  | 1105423 | 1105698 | automatic/finished | —    | protein of unknown function                                       |
| FUMID1_v1_30187  | 1114940 | 1115365 | automatic/finished | —    | conserved exported protein of unknown function                    |
| FUMID1_v1_30189  | 1115523 | 1115816 | automatic/finished | —    | protein of unknown function                                       |
| FUMID1_v1_30195  | 1122884 | 1123648 | automatic/finished | —    | conserved exported protein of unknown function                    |
| FUMID1_v1_30217  | 1145974 | 1146696 | automatic/finished | —    | conserved membrane protein of unknown function                    |
| FUMID1_v1_30220  | 1149481 | 1150158 | automatic/finished | —    | protein of unknown function                                       |
| FUMID1_v1_30236  | 1167308 | 1167559 | automatic/finished | —    | protein of unknown function                                       |
| FUMID1_v1_30239  | 1170263 | 1170493 | automatic/finished | —    | protein of unknown function                                       |
| FUMID1_v1_30245  | 1177444 | 1178346 | automatic/finished | —    | conserved protein of unknown function                             |
| FUMID1_v1_30246  | 1178365 | 1178676 | automatic/finished | —    | protein of unknown function                                       |
| FUMID1_v1_30263  | 1191035 | 1191595 | automatic/finished | —    | conserved protein of unknown function                             |
| FUMID1_v1_30264  | 1191592 | 1193607 | automatic/finished | —    | iron complex transport system ATP-binding protein                 |
| FUMID1_v1_30265  | 1193607 | 1194734 | automatic/finished | —    | iron complex transport system permease protein                    |
| FUMID1_v1_30266  | 1194745 | 1196064 | automatic/finished | —    | iron complex transport system substrate-binding protein           |
| FUMID1_v1_30270  | 1197157 | 1197531 | automatic/finished | —    | protein of unknown function                                       |
| FUMID1_v1_30280  | 1206120 | 1207706 | automatic/finished | fadD | Medium/long-chain-fatty-acid--CoA ligase FadD8                    |
| FUMID1_v1_30282  | 1208690 | 1209232 | automatic/finished | —    | conserved protein of unknown function                             |
| FUMID1_v1_30283  | 1209430 | 1210455 | automatic/finished | —    | conserved protein of unknown function                             |
| FUMID1_v1_30284  | 1210655 | 1211986 | automatic/finished | —    | conserved protein of unknown function                             |
| FUMID1_v1_30285  | 1212127 | 1213623 | automatic/finished | lysS | Lysine--tRNA ligase                                               |
| FUMID1_v1_30287  | 1214618 | 1215163 | automatic/finished | —    | Calcium-binding protein                                           |
| FUMID1_v1_30290  | 1217357 | 1218136 | automatic/finished | —    | protein of unknown function                                       |
| FUMID1_v1_30299  | 1227460 | 1229715 | automatic/finished | —    | protein of unknown function                                       |
| FUMID1_v1_30301  | 1229756 | 1230091 | automatic/finished | —    | protein of unknown function                                       |
| FUMID1_v1_30302  | 1230314 | 1230460 | automatic/finished | —    | protein of unknown function                                       |
| FUMID1_v1_30303  | 1230272 | 1230646 | automatic/finished | —    | protein of unknown function                                       |
| FUMID1_v1_30304  | 1230698 | 1231558 | automatic/finished | —    | phytanoyl-CoA hydroxylase                                         |
| FUMID1_v1_30305  | 1231539 | 1232522 | automatic/finished | —    | conserved protein of unknown function                             |
| FUMID1_v1_30306  | 1232539 | 1233807 | automatic/finished | —    | Methyltransf_11 domain-containing protein                         |
| FUMID1_v1_30307  | 1233804 | 1235552 | automatic/finished | —    | carbamoyltransferase                                              |
| FUMID1_v1_30308  | 1235549 | 1236625 | automatic/finished | —    | Aldo/keto reductase                                               |
| FUMID1_v1_30309  | 1236673 | 1237911 | automatic/finished | —    | cysteine-S-conjugate beta-lyase                                   |
| FUMID1_v1_30310  | 1237892 | 1239109 | automatic/finished | —    | Cytochrome P450                                                   |
| FUMID1_v1_30315  | 1243821 | 1244165 | automatic/finished | —    | protein of unknown function                                       |

|                  |         |         |                    |      |                                                                                    |
|------------------|---------|---------|--------------------|------|------------------------------------------------------------------------------------|
| FUMID1_v1_30317  | 1244468 | 1245343 | automatic/finished | —    | epsilon-lactone hydrolase                                                          |
| FUMID1_v1_30318  | 1245424 | 1245663 | automatic/finished | —    | protein of unknown function                                                        |
| FUMID1_v1_30320  | 1245847 | 1246071 | automatic/finished | —    | protein of unknown function                                                        |
| FUMID1_v1_310001 | 5243848 | 5244996 | automatic/finished | —    | MBL fold metallo-hydrolase                                                         |
| FUMID1_v1_310007 | 5249561 | 5251594 | automatic/finished | —    | conserved protein of unknown function                                              |
| FUMID1_v1_310008 | 5251645 | 5253741 | automatic/finished | —    | conserved exported protein of unknown function                                     |
| FUMID1_v1_310010 | 5254853 | 5254957 | automatic/finished | —    | protein of unknown function                                                        |
| FUMID1_v1_310030 | 5274525 | 5274998 | automatic/finished | —    | tRNA_edit domain-containing protein                                                |
| FUMID1_v1_310031 | 5274357 | 5275178 | automatic/finished | —    | protein of unknown function                                                        |
| FUMID1_v1_310033 | 5275310 | 5276827 | automatic/finished | —    | PPM family protein phosphatase                                                     |
| FUMID1_v1_310036 | 5279396 | 5279743 | automatic/finished | —    | protein of unknown function                                                        |
| FUMID1_v1_310037 | 5280314 | 5281723 | automatic/finished | —    | conserved membrane protein of unknown function                                     |
| FUMID1_v1_310039 | 5283930 | 5284109 | automatic/finished | —    | protein of unknown function                                                        |
| FUMID1_v1_310052 | 5299617 | 5300114 | automatic/finished | —    | protein of unknown function                                                        |
| FUMID1_v1_310053 | 5300069 | 5300836 | automatic/finished | —    | protein of unknown function                                                        |
| FUMID1_v1_320007 | 5307199 | 5308236 | automatic/finished | —    | conserved exported protein of unknown function                                     |
| FUMID1_v1_320008 | 5308450 | 5308995 | automatic/finished | —    | conserved exported protein of unknown function                                     |
| FUMID1_v1_320009 | 5309310 | 5309795 | automatic/finished | sigL | ECF RNA polymerase sigma factor SigL                                               |
| FUMID1_v1_320010 | 5309792 | 5310442 | automatic/finished | —    | zf-HC2 domain-containing protein                                                   |
| FUMID1_v1_320012 | 5311340 | 5311534 | automatic/finished | —    | protein of unknown function                                                        |
| FUMID1_v1_320017 | 5316847 | 5317836 | automatic/finished | —    | protein of unknown function                                                        |
| FUMID1_v1_320018 | 5318000 | 5318185 | automatic/finished | —    | protein of unknown function                                                        |
| FUMID1_v1_320047 | 5350793 | 5351977 | automatic/finished | —    | protein of unknown function                                                        |
| FUMID1_v1_320055 | 5354586 | 5356001 | automatic/finished | —    | conserved protein of unknown function                                              |
| FUMID1_v1_320058 | 5356309 | 5356923 | automatic/finished | —    | conserved membrane protein of unknown function                                     |
| FUMID1_v1_320059 | 5356925 | 5357251 | automatic/finished | —    | protein of unknown function                                                        |
| FUMID1_v1_320060 | 5357328 | 5358749 | automatic/finished | —    | Glycoside hydrolase family 43 (Modular protein)                                    |
| FUMID1_v1_330008 | 5370088 | 5370441 | automatic/finished | —    | protein of unknown function                                                        |
| FUMID1_v1_330013 | 5372459 | 5374534 | automatic/finished | —    | protein of unknown function                                                        |
| FUMID1_v1_330015 | 5376305 | 5376871 | automatic/finished | —    | exported protein of unknown function                                               |
| FUMID1_v1_330051 | 5416916 | 5417362 | automatic/finished | —    | protein of unknown function                                                        |
| FUMID1_v1_340004 | 5433268 | 5436102 | automatic/finished | —    | LuxR family transcriptional regulator, maltose regulon positive regulatory protein |
| FUMID1_v1_340011 | 5438587 | 5439195 | automatic/finished | —    | conserved protein of unknown function                                              |
| FUMID1_v1_340012 | 5439192 | 5439734 | automatic/finished | —    | conserved protein of unknown function                                              |
| FUMID1_v1_340013 | 5439731 | 5441131 | automatic/finished | —    | putative peroxidase                                                                |
| FUMID1_v1_340014 | 5441171 | 5441428 | automatic/finished | —    | protein of unknown function                                                        |
| FUMID1_v1_340015 | 5441509 | 5442711 | automatic/finished | —    | Cytochrome P450                                                                    |
| FUMID1_v1_340016 | 5442938 | 5443630 | automatic/finished | —    | TetR family transcriptional regulator                                              |
| FUMID1_v1_340020 | 5448106 | 5448750 | automatic/finished | —    | protein of unknown function                                                        |
| FUMID1_v1_340038 | 5463997 | 5464377 | automatic/finished | —    | Taurine catabolism dioxygenase TauD, TfdA family                                   |
| FUMID1_v1_340042 | 5468453 | 5472349 | automatic/finished | —    | Multidrug efflux ATP-binding/permease protein BCG_0231                             |
| FUMID1_v1_350025 | 5495408 | 5495545 | automatic/finished | —    | protein of unknown function                                                        |
| FUMID1_v1_350027 | 5497459 | 5497644 | automatic/finished | —    | protein of unknown function                                                        |
| FUMID1_v1_350031 | 5500468 | 5500713 | automatic/finished | —    | protein of unknown function                                                        |
| FUMID1_v1_350033 | 5501258 | 5501452 | automatic/finished | —    | protein of unknown function                                                        |
| FUMID1_v1_350034 | 5501474 | 5502382 | automatic/finished | —    | LLM class F420-dependent oxidoreductase                                            |
| FUMID1_v1_350038 | 5506631 | 5507404 | automatic/finished | —    | Dehydrogenase                                                                      |
| FUMID1_v1_350039 | 5507429 | 5507860 | automatic/finished | —    | protein of unknown function                                                        |
| FUMID1_v1_350040 | 5507857 | 5508741 | automatic/finished | —    | conserved protein of unknown function                                              |
| FUMID1_v1_350041 | 5508392 | 5510944 | automatic/finished | —    | protein of unknown function                                                        |
| FUMID1_v1_350042 | 5508751 | 5509767 | automatic/finished | —    | conserved protein of unknown function                                              |
| FUMID1_v1_350043 | 5511206 | 5513698 | automatic/finished | —    | exported protein of unknown function                                               |
| FUMID1_v1_350045 | 5514291 | 5514620 | automatic/finished | —    | protein of unknown function                                                        |
| FUMID1_v1_350047 | 5515065 | 5515592 | automatic/finished | —    | protein of unknown function                                                        |
| FUMID1_v1_350049 | 5515605 | 5515886 | automatic/finished | —    | protein of unknown function                                                        |
| FUMID1_v1_360002 | 5526088 | 5526738 | automatic/finished | —    | protein of unknown function                                                        |
| FUMID1_v1_360003 | 5526839 | 5527969 | automatic/finished | —    | FG-GAP repeat protein                                                              |
| FUMID1_v1_360005 | 5530434 | 5531117 | automatic/finished | —    | conserved protein of unknown function                                              |
| FUMID1_v1_360009 | 5531163 | 5535200 | automatic/finished | —    | conserved protein of unknown function                                              |
| FUMID1_v1_360010 | 5535197 | 5537578 | automatic/finished | —    | conserved protein of unknown function                                              |
| FUMID1_v1_360011 | 5537581 | 5541435 | automatic/finished | —    | conserved protein of unknown function                                              |
| FUMID1_v1_360012 | 5541500 | 5542960 | automatic/finished | —    | conserved protein of unknown function                                              |
| FUMID1_v1_360018 | 5548275 | 5549192 | automatic/finished | —    | Alcohol dehydrogenase GroES domain protein                                         |
| FUMID1_v1_360026 | 5554162 | 5555019 | automatic/finished | —    | membrane protein of unknown function                                               |
| FUMID1_v1_360030 | 5558235 | 5558537 | automatic/finished | —    | protein of unknown function                                                        |
| FUMID1_v1_360033 | 5560912 | 5562495 | automatic/finished | —    | peptide/nickel transport system substrate-binding protein                          |
| FUMID1_v1_360038 | 5566674 | 5567918 | automatic/finished | cyp  | Pentalenic acid synthase                                                           |
| FUMID1_v1_360039 | 5567918 | 5568475 | automatic/finished | —    | AOC_like domain-containing protein                                                 |
| FUMID1_v1_360040 | 5568535 | 5569113 | automatic/finished | —    | exported protein of unknown function                                               |

|                  |         |         |                    |      |                                                         |
|------------------|---------|---------|--------------------|------|---------------------------------------------------------|
| FUMID1_v1_370023 | 5588528 | 5589775 | automatic/finished | —    | integrase                                               |
| FUMID1_v1_370024 | 5590421 | 5591917 | automatic/finished | —    | TIR domain-containing protein                           |
| FUMID1_v1_370031 | 5603360 | 5603752 | automatic/finished | —    | protein of unknown function                             |
| FUMID1_v1_370032 | 5604126 | 5605286 | automatic/finished | —    | conserved protein of unknown function                   |
| FUMID1_v1_370033 | 5603871 | 5604425 | automatic/finished | —    | protein of unknown function                             |
| FUMID1_v1_370034 | 5604034 | 5604102 | automatic/finished | —    | protein of unknown function                             |
| FUMID1_v1_370035 | 5604923 | 5605336 | automatic/finished | —    | protein of unknown function                             |
| FUMID1_v1_370038 | 5606658 | 5606846 | automatic/finished | —    | protein of unknown function                             |
| FUMID1_v1_370042 | 5611083 | 5611331 | automatic/finished | —    | protein of unknown function                             |
| FUMID1_v1_370046 | 5612919 | 5613605 | automatic/finished | —    | protein of unknown function                             |
| FUMID1_v1_370047 | 5613665 | 5615119 | automatic/finished | —    | conserved protein of unknown function                   |
| FUMID1_v1_380008 | 5624108 | 5625733 | automatic/finished | —    | conserved protein of unknown function                   |
| FUMID1_v1_380015 | 5630848 | 5631429 | automatic/finished | —    | protein of unknown function                             |
| FUMID1_v1_380017 | 5632774 | 5633901 | automatic/finished | —    | conserved protein of unknown function                   |
| FUMID1_v1_380022 | 5636351 | 5637094 | automatic/finished | —    | transcriptional regulator                               |
| FUMID1_v1_380029 | 5643228 | 5643620 | automatic/finished | —    | MarR family transcriptional regulator                   |
| FUMID1_v1_380032 | 5645980 | 5646084 | automatic/finished | —    | protein of unknown function                             |
| FUMID1_v1_380033 | 5646113 | 5646643 | automatic/finished | —    | protein of unknown function                             |
| FUMID1_v1_380034 | 5646276 | 5646626 | automatic/finished | —    | protein of unknown function                             |
| FUMID1_v1_390035 | 5700776 | 5701609 | automatic/finished | —    | protein of unknown function                             |
| FUMID1_v1_400011 | 5716812 | 5717171 | automatic/finished | —    | protein of unknown function                             |
| FUMID1_v1_400013 | 5720152 | 5721717 | automatic/finished | —    | membrane protein of unknown function                    |
| FUMID1_v1_400014 | 5721708 | 5722067 | automatic/finished | —    | conserved protein of unknown function                   |
| FUMID1_v1_400015 | 5722241 | 5722549 | automatic/finished | —    | protein of unknown function                             |
| FUMID1_v1_400017 | 5722876 | 5724336 | automatic/finished | —    | conserved membrane protein of unknown function          |
| FUMID1_v1_40008  | 1264311 | 1264793 | automatic/finished | —    | protein of unknown function                             |
| FUMID1_v1_40011  | 1267262 | 1267438 | automatic/finished | —    | protein of unknown function                             |
| FUMID1_v1_40012  | 1267265 | 1267375 | automatic/finished | —    | protein of unknown function                             |
| FUMID1_v1_40066  | 1326997 | 1327275 | automatic/finished | —    | protein of unknown function                             |
| FUMID1_v1_40074  | 1336424 | 1336558 | automatic/finished | —    | protein of unknown function                             |
| FUMID1_v1_40082  | 1348011 | 1348736 | automatic/finished | —    | protein of unknown function                             |
| FUMID1_v1_40099  | 1364139 | 1364354 | automatic/finished | —    | protein of unknown function                             |
| FUMID1_v1_40102  | 1365394 | 1365570 | automatic/finished | —    | protein of unknown function                             |
| FUMID1_v1_40104  | 1367558 | 1367764 | automatic/finished | —    | protein of unknown function                             |
| FUMID1_v1_40108  | 1370150 | 1370494 | automatic/finished | —    | protein of unknown function                             |
| FUMID1_v1_40113  | 1377742 | 1378281 | automatic/finished | —    | conserved exported protein of unknown function          |
| FUMID1_v1_40119  | 1384274 | 1385680 | automatic/finished | —    | HNHc domain-containing protein                          |
| FUMID1_v1_40129  | 1396836 | 1397009 | automatic/finished | —    | protein of unknown function                             |
| FUMID1_v1_40144  | 1419794 | 1420111 | automatic/finished | —    | protein of unknown function                             |
| FUMID1_v1_40166  | 1443292 | 1444491 | automatic/finished | —    | Cytochrome P450                                         |
| FUMID1_v1_40167  | 1444667 | 1445512 | automatic/finished | —    | protein of unknown function                             |
| FUMID1_v1_40168  | 1445552 | 1446190 | automatic/finished | —    | HTH tetR-type domain-containing protein                 |
| FUMID1_v1_40169  | 1446196 | 1446687 | automatic/finished | —    | SnoaL-like domain-containing protein                    |
| FUMID1_v1_40170  | 1446698 | 1447093 | automatic/finished | —    | SnoaL-like domain-containing protein                    |
| FUMID1_v1_40171  | 1447304 | 1448587 | automatic/finished | —    | Acyl-CoA dehydrogenase domain protein                   |
| FUMID1_v1_40172  | 1448584 | 1449735 | automatic/finished | —    | Acyl-CoA dehydrogenase domain protein                   |
| FUMID1_v1_40173  | 1450176 | 1451390 | automatic/finished | —    | Carnitine dehydratase                                   |
| FUMID1_v1_40175  | 1453095 | 1454306 | automatic/finished | —    | Amidohydrolase 2                                        |
| FUMID1_v1_40176  | 1454539 | 1455657 | automatic/finished | —    | Acyl-CoA dehydrogenase                                  |
| FUMID1_v1_40177  | 1455647 | 1456855 | automatic/finished | —    | Acyl-CoA dehydrogenase                                  |
| FUMID1_v1_40178  | 1456924 | 1458018 | automatic/finished | —    | 5,10-methylenetetrahydromethanopterin reductase         |
| FUMID1_v1_40180  | 1459960 | 1460868 | automatic/finished | —    | Amidohydrolase 2                                        |
| FUMID1_v1_40182  | 1462053 | 1463261 | automatic/finished | —    | Acyl-CoA dehydrogenase                                  |
| FUMID1_v1_40189  | 1466090 | 1466974 | automatic/finished | —    | Luciferase                                              |
| FUMID1_v1_40190  | 1467042 | 1467167 | automatic/finished | —    | protein of unknown function                             |
| FUMID1_v1_40191  | 1467238 | 1468989 | automatic/finished | casI | Steroid-22-oyl-CoA synthetase                           |
| FUMID1_v1_40193  | 1468998 | 1470008 | automatic/finished | —    | putative coenzyme F420-dependent oxidoreductase Rv3520c |
| FUMID1_v1_40197  | 1474485 | 1475282 | automatic/finished | echA | putative enoyl-CoA hydratase EchA13                     |
| FUMID1_v1_40198  | 1475409 | 1476854 | automatic/finished | —    | Acyl-CoA synthetase (AMP-forming)/AMP-acid ligase II    |
| FUMID1_v1_40199  | 1476934 | 1478112 | automatic/finished | —    | Amidohydrolase 2                                        |
| FUMID1_v1_40200  | 1478164 | 1479141 | automatic/finished | —    | Acyl-CoA dehydrogenase                                  |
| FUMID1_v1_40201  | 1479138 | 1480298 | automatic/finished | —    | Acyl-CoA dehydrogenase domain protein                   |
| FUMID1_v1_40203  | 1481161 | 1482813 | automatic/finished | —    | AMP-dependent synthetase and ligase                     |
| FUMID1_v1_40204  | 1482863 | 1484647 | automatic/finished | —    | GGDEF domain-containing protein                         |
| FUMID1_v1_40205  | 1484787 | 1486124 | automatic/finished | —    | Acyl-CoA thioesterase                                   |
| FUMID1_v1_40206  | 1486129 | 1487283 | automatic/finished | —    | Acyl-coenzyme A thioesterase Paal, contains HGG motif   |
| FUMID1_v1_40209  | 1488780 | 1489595 | automatic/finished | —    | 3-alpha-(or 20-beta)-hydroxysteroid dehydrogenase       |
| FUMID1_v1_40210  | 1489687 | 1490910 | automatic/finished | —    | Amidohydrolase 2                                        |
| FUMID1_v1_40211  | 1490974 | 1492698 | automatic/finished | —    | N-acyl-D-amino-acid deacylase                           |

|                  |         |         |                    |      |                                                                            |
|------------------|---------|---------|--------------------|------|----------------------------------------------------------------------------|
| FUMID1_v1_40212  | 1493013 | 1494944 | automatic/finished | —    | 4-hydroxyacetophenone monooxygenase                                        |
| FUMID1_v1_40213  | 1495012 | 1495710 | automatic/finished | —    | Regulatory protein, tetR family                                            |
| FUMID1_v1_40214  | 1495703 | 1497076 | automatic/finished | —    | Lysophospholipase L1-like esterase                                         |
| FUMID1_v1_40227  | 1509473 | 1509679 | automatic/finished | —    | protein of unknown function                                                |
| FUMID1_v1_40251  | 1528962 | 1529405 | automatic/finished | —    | protein of unknown function                                                |
| FUMID1_v1_40252  | 1529460 | 1530392 | automatic/finished | —    | acetyl esterase                                                            |
| FUMID1_v1_40253  | 1530650 | 1530985 | automatic/finished | —    | protein of unknown function                                                |
| FUMID1_v1_40257  | 1532819 | 1533250 | automatic/finished | —    | protein of unknown function                                                |
| FUMID1_v1_40272  | 1552020 | 1553975 | automatic/finished | —    | putative DUF5667 domain-containing protein                                 |
| FUMID1_v1_40278  | 1559849 | 1559968 | automatic/finished | —    | protein of unknown function                                                |
| FUMID1_v1_410003 | 5745882 | 5746952 | automatic/finished | —    | NADPH2:quinone reductase                                                   |
| FUMID1_v1_410017 | 5756702 | 5757514 | automatic/finished | —    | protein of unknown function                                                |
| FUMID1_v1_410019 | 5757537 | 5758991 | automatic/finished | —    | Amino acid permease-associated region                                      |
| FUMID1_v1_410026 | 5764416 | 5764586 | automatic/finished | —    | protein of unknown function                                                |
| FUMID1_v1_410027 | 5764579 | 5765031 | automatic/finished | —    | conserved protein of unknown function                                      |
| FUMID1_v1_410040 | 5773758 | 5773973 | automatic/finished | —    | protein of unknown function                                                |
| FUMID1_v1_410042 | 5774884 | 5775147 | automatic/finished | —    | protein of unknown function                                                |
| FUMID1_v1_410045 | 5776389 | 5777336 | automatic/finished | —    | conserved membrane protein of unknown function                             |
| FUMID1_v1_410046 | 5777481 | 5778770 | automatic/finished | —    | two-component system, NarL family, sensor histidine kinase DesK            |
| FUMID1_v1_420007 | 5793320 | 5793622 | automatic/finished | —    | protein of unknown function                                                |
| FUMID1_v1_420008 | 5793833 | 5795809 | automatic/finished | —    | PepX_C domain-containing protein                                           |
| FUMID1_v1_420009 | 5793688 | 5794086 | automatic/finished | —    | protein of unknown function                                                |
| FUMID1_v1_420010 | 5796010 | 5797206 | automatic/finished | serA | phosphoglycerate dehydrogenase                                             |
| FUMID1_v1_420015 | 5802264 | 5803340 | automatic/finished | —    | 5,10-methylenetetrahydromethanopterin reductase                            |
| FUMID1_v1_420016 | 5803370 | 5804134 | automatic/finished | —    | TetR family transcriptional regulator                                      |
| FUMID1_v1_420017 | 5804261 | 5805988 | automatic/finished | —    | N-acyl-D-amino-acid deacylase                                              |
| FUMID1_v1_420018 | 5806109 | 5807335 | automatic/finished | —    | Amidohydrolase                                                             |
| FUMID1_v1_420019 | 5807418 | 5808293 | automatic/finished | —    | putative F420-dependent oxidoreductase                                     |
| FUMID1_v1_420020 | 5808290 | 5809075 | automatic/finished | —    | Short-chain dehydrogenase                                                  |
| FUMID1_v1_420021 | 5809072 | 5809584 | automatic/finished | —    | SnoaL-like domain-containing protein                                       |
| FUMID1_v1_420022 | 5809712 | 5810437 | automatic/finished | —    | conserved protein of unknown function                                      |
| FUMID1_v1_420023 | 5810412 | 5811119 | automatic/finished | —    | TetR family transcriptional regulator                                      |
| FUMID1_v1_420024 | 5811221 | 5812648 | automatic/finished | —    | putative NB-ARC domain-containing protein                                  |
| FUMID1_v1_420037 | 5824301 | 5825101 | automatic/finished | —    | phosphate transport system substrate-binding protein                       |
| FUMID1_v1_430003 | 5829058 | 5829543 | automatic/finished | —    | conserved protein of unknown function                                      |
| FUMID1_v1_430010 | 5836581 | 5836850 | automatic/finished | —    | protein of unknown function                                                |
| FUMID1_v1_430013 | 5838071 | 5838256 | automatic/finished | —    | protein of unknown function                                                |
| FUMID1_v1_430025 | 5851400 | 5851618 | automatic/finished | —    | protein of unknown function                                                |
| FUMID1_v1_430027 | 5853734 | 5854498 | automatic/finished | —    | putative nucleic-acid-binding protein containing a Zn-ribbon               |
| FUMID1_v1_450009 | 5899115 | 5902786 | automatic/finished | —    | Glycosyltransferase like family 2                                          |
| FUMID1_v1_450018 | 5912752 | 5913426 | automatic/finished | —    | protein of unknown function                                                |
| FUMID1_v1_460004 | 5929263 | 5929427 | automatic/finished | —    | protein of unknown function                                                |
| FUMID1_v1_460016 | 5941803 | 5942603 | automatic/finished | —    | Purine nucleoside phosphorylase                                            |
| FUMID1_v1_460020 | 5946469 | 5947377 | automatic/finished | —    | SDR family NAD(P)-dependent oxidoreductase                                 |
| FUMID1_v1_460021 | 5946200 | 5946418 | automatic/finished | —    | protein of unknown function                                                |
| FUMID1_v1_460022 | 5947597 | 5948232 | automatic/finished | —    | protein of unknown function                                                |
| FUMID1_v1_460025 | 5948760 | 5949341 | automatic/finished | —    | protein of unknown function                                                |
| FUMID1_v1_460026 | 5949386 | 5949565 | automatic/finished | —    | protein of unknown function                                                |
| FUMID1_v1_480017 | 5993133 | 5994263 | automatic/finished | —    | 2-polyprenyl-6-methoxyphenol hydroxylase                                   |
| FUMID1_v1_480018 | 5994294 | 5995223 | automatic/finished | —    | putative Biphenyl-2,3-diol 1,2-dioxygenase                                 |
| FUMID1_v1_480019 | 5995432 | 5996406 | automatic/finished | —    | FAA_hydrolase domain-containing protein                                    |
| FUMID1_v1_480021 | 5997728 | 5998735 | automatic/finished | —    | APH domain-containing protein                                              |
| FUMID1_v1_480022 | 5998732 | 5999763 | automatic/finished | gyaR | Glyoxylate reductase                                                       |
| FUMID1_v1_490003 | 6021662 | 6024406 | automatic/finished | —    | protein of unknown function                                                |
| FUMID1_v1_500001 | 6024574 | 6032586 | automatic/finished | —    | protein of unknown function                                                |
| FUMID1_v1_500009 | 6042826 | 6044061 | automatic/finished | —    | Amidohydrolase 2                                                           |
| FUMID1_v1_500010 | 6044335 | 6045045 | automatic/finished | —    | TetR/AcrR family transcriptional regulator, tetracycline repressor protein |
| FUMID1_v1_50013  | 1575549 | 1575953 | automatic/finished | —    | protein of unknown function                                                |
| FUMID1_v1_50020  | 1579601 | 1580665 | automatic/finished | —    | 2-polyprenyl-6-methoxyphenol hydroxylase-like FAD-dependent oxidoreductase |
| FUMID1_v1_50021  | 1580708 | 1581268 | automatic/finished | —    | protein of unknown function                                                |
| FUMID1_v1_50022  | 1581307 | 1582164 | automatic/finished | —    | exodeoxyribonuclease III                                                   |
| FUMID1_v1_50023  | 1581316 | 1582605 | automatic/finished | —    | protein of unknown function                                                |
| FUMID1_v1_50030  | 1586799 | 1587290 | automatic/finished | —    | protein of unknown function                                                |
| FUMID1_v1_50031  | 1587872 | 1588783 | automatic/finished | —    | NADPH:quinone reductase                                                    |
| FUMID1_v1_50032  | 1588876 | 1589082 | automatic/finished | —    | protein of unknown function                                                |
| FUMID1_v1_50033  | 1589210 | 1590925 | automatic/finished | —    | conserved protein of unknown function                                      |
| FUMID1_v1_50055  | 1606696 | 1607538 | automatic/finished | —    | XRE family transcriptional regulator                                       |
| FUMID1_v1_50056  | 1607576 | 1607653 | automatic/finished | —    | protein of unknown function                                                |
| FUMID1_v1_50060  | 1610576 | 1610932 | automatic/finished | —    | conserved protein of unknown function                                      |

|                  |         |         |                    |      |                                                               |
|------------------|---------|---------|--------------------|------|---------------------------------------------------------------|
| FUMID1_v1_50062  | 1611493 | 1612245 | automatic/finished | —    | protein of unknown function                                   |
| FUMID1_v1_50066  | 1614437 | 1615315 | automatic/finished | —    | DNA-binding protein                                           |
| FUMID1_v1_50067  | 1615430 | 1617070 | automatic/finished | mdtD | putative multidrug resistance protein MdtD                    |
| FUMID1_v1_50068  | 1617193 | 1617408 | automatic/finished | —    | protein of unknown function                                   |
| FUMID1_v1_50069  | 1617396 | 1618265 | automatic/finished | —    | Alpha/beta hydrolase                                          |
| FUMID1_v1_50070  | 1618265 | 1618813 | automatic/finished | —    | Transcriptional regulator, TetR family                        |
| FUMID1_v1_50071  | 1619016 | 1620245 | automatic/finished | —    | putative RNA polymerase, sigma 70 family subunit              |
| FUMID1_v1_50073  | 1620242 | 1620652 | automatic/finished | —    | DGPFAETKE family protein                                      |
| FUMID1_v1_50081  | 1630208 | 1631752 | automatic/finished | —    | tyrosinase                                                    |
| FUMID1_v1_50082  | 1632005 | 1632211 | automatic/finished | —    | protein of unknown function                                   |
| FUMID1_v1_50084  | 1637889 | 1638467 | automatic/finished | —    | protein of unknown function                                   |
| FUMID1_v1_50086  | 1638723 | 1639127 | automatic/finished | —    | conserved exported protein of unknown function                |
| FUMID1_v1_50087  | 1639210 | 1640250 | automatic/finished | —    | conserved exported protein of unknown function                |
| FUMID1_v1_50088  | 1640481 | 1640939 | automatic/finished | —    | Transcriptional regulator, MarR family                        |
| FUMID1_v1_50094  | 1645552 | 1645788 | automatic/finished | —    | protein of unknown function                                   |
| FUMID1_v1_50100  | 1655192 | 1656031 | automatic/finished | —    | putative Metal-binding integral membrane protein-like protein |
| FUMID1_v1_50101  | 1656135 | 1657691 | automatic/finished | —    | Tyrosinase                                                    |
| FUMID1_v1_50103  | 1658114 | 1658971 | automatic/finished | —    | NADP-dependent 3-hydroxy acid dehydrogenase YdfG              |
| FUMID1_v1_50104  | 1659151 | 1659861 | automatic/finished | —    | Short-chain dehydrogenase                                     |
| FUMID1_v1_50106  | 1660809 | 1661360 | automatic/finished | —    | protein of unknown function                                   |
| FUMID1_v1_50107  | 1661458 | 1661931 | automatic/finished | —    | protein of unknown function                                   |
| FUMID1_v1_50113  | 1669540 | 1669884 | automatic/finished | —    | protein of unknown function                                   |
| FUMID1_v1_50140  | 1696924 | 1697115 | automatic/finished | —    | protein of unknown function                                   |
| FUMID1_v1_50141  | 1697172 | 1698089 | automatic/finished | —    | conserved protein of unknown function                         |
| FUMID1_v1_50144  | 1699687 | 1699971 | automatic/finished | —    | protein of unknown function                                   |
| FUMID1_v1_50151  | 1706862 | 1706930 | automatic/finished | —    | protein of unknown function                                   |
| FUMID1_v1_50156  | 1734484 | 1734681 | automatic/finished | —    | protein of unknown function                                   |
| FUMID1_v1_50162  | 1744838 | 1745023 | automatic/finished | —    | protein of unknown function                                   |
| FUMID1_v1_50170  | 1752282 | 1752935 | automatic/finished | —    | protein of unknown function                                   |
| FUMID1_v1_50171  | 1753124 | 1753363 | automatic/finished | —    | protein of unknown function                                   |
| FUMID1_v1_50179  | 1759928 | 1760194 | automatic/finished | —    | protein of unknown function                                   |
| FUMID1_v1_50182  | 1760761 | 1760907 | automatic/finished | —    | protein of unknown function                                   |
| FUMID1_v1_50184  | 1762026 | 1762544 | automatic/finished | —    | exported protein of unknown function                          |
| FUMID1_v1_50205  | 1779840 | 1780352 | automatic/finished | —    | conserved protein of unknown function                         |
| FUMID1_v1_50206  | 1780384 | 1781055 | automatic/finished | —    | conserved exported protein of unknown function                |
| FUMID1_v1_50223  | 1807809 | 1808462 | automatic/finished | —    | conserved protein of unknown function                         |
| FUMID1_v1_50232  | 1815756 | 1816049 | automatic/finished | —    | protein of unknown function                                   |
| FUMID1_v1_50235  | 1818155 | 1818367 | automatic/finished | —    | protein of unknown function                                   |
| FUMID1_v1_50236  | 1818265 | 1818483 | automatic/finished | —    | protein of unknown function                                   |
| FUMID1_v1_50237  | 1818644 | 1819165 | automatic/finished | —    | protein of unknown function                                   |
| FUMID1_v1_50243  | 1823358 | 1823759 | automatic/finished | —    | protein of unknown function                                   |
| FUMID1_v1_50249  | 1829005 | 1829256 | automatic/finished | —    | protein of unknown function                                   |
| FUMID1_v1_50251  | 1830461 | 1831855 | automatic/finished | —    | Chromosome segregation protein SMC                            |
| FUMID1_v1_50254  | 1833826 | 1834041 | automatic/finished | —    | protein of unknown function                                   |
| FUMID1_v1_50270  | 1850442 | 1850534 | automatic/finished | —    | protein of unknown function                                   |
| FUMID1_v1_510005 | 6052660 | 6052773 | automatic/finished | —    | protein of unknown function                                   |
| FUMID1_v1_510006 | 6052852 | 6053853 | automatic/finished | —    | Luciferase                                                    |
| FUMID1_v1_510007 | 6053760 | 6054146 | automatic/finished | —    | protein of unknown function                                   |
| FUMID1_v1_510011 | 6056480 | 6056728 | automatic/finished | —    | protein of unknown function                                   |
| FUMID1_v1_510012 | 6056709 | 6057839 | automatic/finished | —    | 2-polyprenyl-6-methoxyphenol hydroxylase                      |
| FUMID1_v1_510014 | 6058469 | 6058780 | automatic/finished | —    | protein of unknown function                                   |
| FUMID1_v1_520004 | 6074340 | 6076313 | automatic/finished | —    | conserved exported protein of unknown function                |
| FUMID1_v1_520011 | 6080607 | 6081404 | automatic/finished | —    | conserved protein of unknown function                         |
| FUMID1_v1_520012 | 6081401 | 6082375 | automatic/finished | —    | Rubrythrin family protein                                     |
| FUMID1_v1_520016 | 6086049 | 6086540 | automatic/finished | —    | VOC domain-containing protein                                 |
| FUMID1_v1_520017 | 6086537 | 6086899 | automatic/finished | —    | Glyoxalase                                                    |
| FUMID1_v1_520018 | 6087123 | 6087866 | automatic/finished | —    | putative FHA domain-containing protein                        |
| FUMID1_v1_520020 | 6089305 | 6089796 | automatic/finished | —    | protein of unknown function                                   |
| FUMID1_v1_520023 | 6093181 | 6095349 | automatic/finished | —    | beta-glucosidase                                              |
| FUMID1_v1_530002 | 6097052 | 6097888 | automatic/finished | —    | protein of unknown function                                   |
| FUMID1_v1_530003 | 6098655 | 6099866 | automatic/finished | cyp  | Steroid C26-monooxygenase                                     |
| FUMID1_v1_530004 | 6099942 | 6100739 | automatic/finished | —    | enoyl-CoA hydratase                                           |
| FUMID1_v1_530005 | 6100834 | 6101973 | automatic/finished | —    | Phenylpropionate dioxygenase, large terminal subunit          |
| FUMID1_v1_530006 | 6102139 | 6103038 | automatic/finished | —    | putative short-chain type dehydrogenase/reductase Rv0148      |
| FUMID1_v1_530007 | 6103142 | 6104701 | automatic/finished | fadD | Medium/long-chain-fatty-acid--CoA ligase FadD8                |
| FUMID1_v1_530009 | 6106313 | 6107431 | automatic/finished | adhB | Alcohol dehydrogenase B                                       |
| FUMID1_v1_530010 | 6107474 | 6108463 | automatic/finished | —    | OB_aCoA_assoc domain-containing protein                       |
| FUMID1_v1_530011 | 6108463 | 6109515 | automatic/finished | —    | Lipid-transfer protein                                        |
| FUMID1_v1_530012 | 6109512 | 6110672 | automatic/finished | —    | Thiolase domain-containing protein                            |

|                  |         |         |                    |      |                                                                                |
|------------------|---------|---------|--------------------|------|--------------------------------------------------------------------------------|
| FUMID1_v1_530015 | 6111521 | 6113176 | automatic/finished | fadD | Medium/long-chain-fatty-acid--CoA/3-oxocholest-4-en-26-oate--CoA ligase        |
| FUMID1_v1_530017 | 6113915 | 6114385 | automatic/finished | --   | Glyoxalase/bleomycin resistance protein/dioxygenase                            |
| FUMID1_v1_530018 | 6114641 | 6114997 | automatic/finished | --   | exported protein of unknown function                                           |
| FUMID1_v1_530019 | 6115109 | 6115834 | automatic/finished | --   | putative hydrolase of the HAD superfamily                                      |
| FUMID1_v1_530020 | 6116455 | 6116955 | automatic/finished | --   | Hemerythrin                                                                    |
| FUMID1_v1_540009 | 6122442 | 6123536 | automatic/finished | --   | conserved protein of unknown function                                          |
| FUMID1_v1_540010 | 6123538 | 6124500 | automatic/finished | --   | Malonyl transferase                                                            |
| FUMID1_v1_540012 | 6125382 | 6128192 | automatic/finished | --   | protein of unknown function                                                    |
| FUMID1_v1_560002 | 6160392 | 6160778 | automatic/finished | glxB | methylglyoxalase; lactoylbacillithiol lyase                                    |
| FUMID1_v1_560003 | 6160885 | 6161097 | automatic/finished | --   | protein of unknown function                                                    |
| FUMID1_v1_560004 | 6161253 | 6162083 | automatic/finished | --   | putative non-heme chloroperoxidase                                             |
| FUMID1_v1_560009 | 6172112 | 6172480 | automatic/finished | --   | protein of unknown function                                                    |
| FUMID1_v1_560012 | 6174775 | 6176241 | automatic/finished | --   | conserved protein of unknown function                                          |
| FUMID1_v1_560013 | 6176238 | 6177257 | automatic/finished | --   | membrane protein of unknown function                                           |
| FUMID1_v1_570001 | 6177529 | 6178770 | automatic/finished | --   | Peripla_BP_6 domain-containing protein                                         |
| FUMID1_v1_570002 | 6178969 | 6181383 | automatic/finished | --   | beta-glucosidase                                                               |
| FUMID1_v1_570003 | 6181412 | 6181654 | automatic/finished | --   | protein of unknown function                                                    |
| FUMID1_v1_570004 | 6181674 | 6181892 | automatic/finished | --   | protein of unknown function                                                    |
| FUMID1_v1_570005 | 6182061 | 6182945 | automatic/finished | nlhH | Carboxylesterase NlhH                                                          |
| FUMID1_v1_570006 | 6182971 | 6184122 | automatic/finished | galK | Galactokinase                                                                  |
| FUMID1_v1_570007 | 6184119 | 6185093 | automatic/finished | --   | Galactose-1-phosphate uridylyltransferase                                      |
| FUMID1_v1_570008 | 6185090 | 6185314 | automatic/finished | --   | protein of unknown function                                                    |
| FUMID1_v1_570009 | 6185781 | 6188282 | automatic/finished | --   | beta-galactosidase                                                             |
| FUMID1_v1_570011 | 6188446 | 6189663 | automatic/finished | --   | putative Peripla_BP_6 domain-containing protein                                |
| FUMID1_v1_570014 | 6193286 | 6194008 | automatic/finished | --   | TetR/AcrR family transcriptional regulator, tetracycline repressor protein     |
| FUMID1_v1_570015 | 6194005 | 6194643 | automatic/finished | --   | platelet-activating factor acetylhydrolase IB subunit beta/gamma               |
| FUMID1_v1_580014 | 6211160 | 6211252 | automatic/finished | --   | protein of unknown function                                                    |
| FUMID1_v1_590001 | 6211420 | 6211557 | automatic/finished | --   | protein of unknown function                                                    |
| FUMID1_v1_590004 | 6214218 | 6215771 | automatic/finished | --   | Aldehyde dehydrogenase (NAD(+))                                                |
| FUMID1_v1_590007 | 6217745 | 6217969 | automatic/finished | --   | protein of unknown function                                                    |
| FUMID1_v1_590008 | 6218028 | 6218168 | automatic/finished | --   | protein of unknown function                                                    |
| FUMID1_v1_590009 | 6218554 | 6218952 | automatic/finished | --   | protein of unknown function                                                    |
| FUMID1_v1_590010 | 6219002 | 6219799 | automatic/finished | --   | NADPH-dependent ferric siderophore reductase                                   |
| FUMID1_v1_590011 | 6219924 | 6220196 | automatic/finished | --   | protein of unknown function                                                    |
| FUMID1_v1_590012 | 6219872 | 6220213 | automatic/finished | --   | protein of unknown function                                                    |
| FUMID1_v1_590015 | 6221691 | 6223184 | automatic/finished | --   | 2-polypropenyl-6-methoxyphenol hydroxylase-like FAD-dependent oxidoreductase   |
| FUMID1_v1_590016 | 6223392 | 6224357 | automatic/finished | --   | DNA-binding Lrp family transcriptional regulator                               |
| FUMID1_v1_600004 | 6231502 | 6233241 | automatic/finished | --   | Dyp-type peroxidase family                                                     |
| FUMID1_v1_600005 | 6233238 | 6234404 | automatic/finished | --   | conserved protein of unknown function                                          |
| FUMID1_v1_60003  | 1864718 | 1865011 | automatic/finished | --   | protein of unknown function                                                    |
| FUMID1_v1_60014  | 1876593 | 1877876 | automatic/finished | --   | Glycosyltransferase involved in cell wall bisynthesis                          |
| FUMID1_v1_60015  | 1877909 | 1879285 | automatic/finished | --   | conserved protein of unknown function                                          |
| FUMID1_v1_60016  | 1879318 | 1880364 | automatic/finished | --   | vancomycin resistance protein VanJ                                             |
| FUMID1_v1_60017  | 1880370 | 1882355 | automatic/finished | --   | membrane protein of unknown function                                           |
| FUMID1_v1_60018  | 1882611 | 1882907 | automatic/finished | --   | protein of unknown function                                                    |
| FUMID1_v1_60020  | 1883337 | 1883420 | automatic/finished | --   | protein of unknown function                                                    |
| FUMID1_v1_60021  | 1883643 | 1884536 | automatic/finished | --   | dolichol-phosphate hexosyltransferase                                          |
| FUMID1_v1_60022  | 1884649 | 1887261 | automatic/finished | --   | conserved membrane protein of unknown function                                 |
| FUMID1_v1_60023  | 1887258 | 1888466 | automatic/finished | --   | Glycosyltransferase involved in cell wall biosynthesis                         |
| FUMID1_v1_60024  | 1888463 | 1889179 | automatic/finished | --   | Polysaccharide deacetylase                                                     |
| FUMID1_v1_60025  | 1889176 | 1889697 | automatic/finished | --   | protein of unknown function                                                    |
| FUMID1_v1_60026  | 1889792 | 1891039 | automatic/finished | --   | protein of unknown function                                                    |
| FUMID1_v1_60027  | 1891000 | 1892364 | automatic/finished | --   | polysaccharide biosynthesis protein PslG                                       |
| FUMID1_v1_60028  | 1892484 | 1893869 | automatic/finished | --   | Dihydrolipoamide acetyltransferase component of pyruvate dehydrogenase complex |
| FUMID1_v1_60031  | 1896209 | 1897387 | automatic/finished | --   | prephenate dehydrogenase                                                       |
| FUMID1_v1_60032  | 1897731 | 1898432 | automatic/finished | --   | maltose O-acetyltransferase                                                    |
| FUMID1_v1_60033  | 1898429 | 1899508 | automatic/finished | --   | glucosyl-dolichyl phosphate glucuronosyltransferase                            |
| FUMID1_v1_60034  | 1899579 | 1901135 | automatic/finished | --   | Polysaccharide biosynthesis protein                                            |
| FUMID1_v1_60036  | 1902319 | 1902984 | automatic/finished | --   | membrane protein of unknown function                                           |
| FUMID1_v1_60037  | 1903046 | 1905253 | automatic/finished | --   | conserved membrane protein of unknown function                                 |
| FUMID1_v1_60040  | 1907776 | 1908045 | automatic/finished | --   | protein of unknown function                                                    |
| FUMID1_v1_60041  | 1908042 | 1908668 | automatic/finished | --   | maltose O-acetyltransferase                                                    |
| FUMID1_v1_60043  | 1909312 | 1910898 | automatic/finished | --   | Carboxylic ester hydrolase                                                     |
| FUMID1_v1_60046  | 1912768 | 1914210 | automatic/finished | --   | 4-hydroxyphenylacetate 3-monooxygenase                                         |
| FUMID1_v1_60048  | 1915216 | 1916727 | automatic/finished | --   | Histidine kinase                                                               |
| FUMID1_v1_60109  | 1984300 | 1984707 | automatic/finished | --   | protein of unknown function                                                    |
| FUMID1_v1_60127  | 2004155 | 2004394 | automatic/finished | --   | protein of unknown function                                                    |
| FUMID1_v1_60169  | 2053623 | 2053997 | automatic/finished | --   | exported protein of unknown function                                           |
| FUMID1_v1_60170  | 2053930 | 2054139 | automatic/finished | --   | protein of unknown function                                                    |

|                  |         |         |                    |   |                                                                     |
|------------------|---------|---------|--------------------|---|---------------------------------------------------------------------|
| FUMID1_v1_60191  | 2074186 | 2075049 | automatic/finished | — | 3-oxoacyl-ACP reductase                                             |
| FUMID1_v1_60194  | 2076628 | 2076951 | automatic/finished | — | Antibiotic biosynthesis monooxygenase                               |
| FUMID1_v1_60200  | 2079481 | 2080818 | automatic/finished | — | Branched-chain amino acid ABC transporter substrate-binding protein |
| FUMID1_v1_60201  | 2080043 | 2080873 | automatic/finished | — | exported protein of unknown function                                |
| FUMID1_v1_60205  | 2086994 | 2089543 | automatic/finished | — | protein-glutamine gamma-glutamyltransferase                         |
| FUMID1_v1_60248  | 2128433 | 2128615 | automatic/finished | — | protein of unknown function                                         |
| FUMID1_v1_610001 | 6243595 | 6245268 | automatic/finished | — | AMP-dependent synthetase and ligase                                 |
| FUMID1_v1_610004 | 6247098 | 6247715 | automatic/finished | — | DinB family protein                                                 |
| FUMID1_v1_610005 | 6247777 | 6248781 | automatic/finished | — | Transcriptional regulator                                           |
| FUMID1_v1_610006 | 6248778 | 6251408 | automatic/finished | — | protein of unknown function                                         |
| FUMID1_v1_610007 | 6251410 | 6252732 | automatic/finished | — | Low temperature requirement A                                       |
| FUMID1_v1_620001 | 6259107 | 6259463 | automatic/finished | — | conserved protein of unknown function                               |
| FUMID1_v1_620007 | 6268907 | 6269380 | automatic/finished | — | protein of unknown function                                         |
| FUMID1_v1_620012 | 6271787 | 6272806 | automatic/finished | — | protein of unknown function                                         |
| FUMID1_v1_640001 | 6283638 | 6284549 | automatic/finished | — | membrane protein of unknown function                                |
| FUMID1_v1_640002 | 6284546 | 6286174 | automatic/finished | — | protein of unknown function                                         |
| FUMID1_v1_640003 | 6286224 | 6287075 | automatic/finished | — | protein of unknown function                                         |
| FUMID1_v1_640007 | 6291827 | 6292864 | automatic/finished | — | protein of unknown function                                         |
| FUMID1_v1_660001 | 6302150 | 6302614 | automatic/finished | — | conserved protein of unknown function                               |
| FUMID1_v1_660002 | 6302682 | 6302807 | automatic/finished | — | protein of unknown function                                         |
| FUMID1_v1_660003 | 6302902 | 6303084 | automatic/finished | — | protein of unknown function                                         |
| FUMID1_v1_660004 | 6302956 | 6303051 | automatic/finished | — | protein of unknown function                                         |
| FUMID1_v1_660005 | 6303077 | 6303202 | automatic/finished | — | protein of unknown function                                         |
| FUMID1_v1_660007 | 6308063 | 6309733 | automatic/finished | — | choline dehydrogenase                                               |
| FUMID1_v1_670001 | 6310714 | 6311172 | automatic/finished | — | protein of unknown function                                         |
| FUMID1_v1_670002 | 6310865 | 6311632 | automatic/finished | — | protein of unknown function                                         |
| FUMID1_v1_670003 | 6311648 | 6312520 | automatic/finished | — | conserved protein of unknown function                               |
| FUMID1_v1_670004 | 6312853 | 6313551 | automatic/finished | — | fluoroquinolone resistance protein                                  |
| FUMID1_v1_670009 | 6315858 | 6316190 | automatic/finished | — | protein of unknown function                                         |
| FUMID1_v1_670010 | 6315797 | 6316447 | automatic/finished | — | protein of unknown function                                         |
| FUMID1_v1_700004 | 6332418 | 6333158 | automatic/finished | — | protein of unknown function                                         |
| FUMID1_v1_700005 | 6332697 | 6332870 | automatic/finished | — | protein of unknown function                                         |
| FUMID1_v1_70001  | 2152053 | 2152301 | automatic/finished | — | protein of unknown function                                         |
| FUMID1_v1_70004  | 2153968 | 2154192 | automatic/finished | — | protein of unknown function                                         |
| FUMID1_v1_70005  | 2154706 | 2154981 | automatic/finished | — | protein of unknown function                                         |
| FUMID1_v1_70007  | 2155069 | 2156304 | automatic/finished | — | ABC transporter substrate-binding protein                           |
| FUMID1_v1_70008  | 2156711 | 2157940 | automatic/finished | — | Peripla_BP_6 domain-containing protein                              |
| FUMID1_v1_70009  | 2158092 | 2158637 | automatic/finished | — | SnoaL-like domain-containing protein                                |
| FUMID1_v1_70011  | 2159901 | 2161130 | automatic/finished | — | Peripla_BP_6 domain-containing protein                              |
| FUMID1_v1_70012  | 2159840 | 2160016 | automatic/finished | — | protein of unknown function                                         |
| FUMID1_v1_70017  | 2166775 | 2167392 | automatic/finished | — | Flavodoxin domain                                                   |
| FUMID1_v1_70036  | 2185850 | 2186374 | automatic/finished | — | protein of unknown function                                         |
| FUMID1_v1_70046  | 2196378 | 2196713 | automatic/finished | — | protein of unknown function                                         |
| FUMID1_v1_70066  | 2210611 | 2211948 | automatic/finished | — | threonyl-tRNA synthetase                                            |
| FUMID1_v1_70071  | 2220571 | 2222373 | automatic/finished | — | TIR domain-containing protein                                       |
| FUMID1_v1_70072  | 2222189 | 2222638 | automatic/finished | — | protein of unknown function                                         |
| FUMID1_v1_70086  | 2242834 | 2243310 | automatic/finished | — | protein of unknown function                                         |
| FUMID1_v1_70092  | 2246559 | 2247020 | automatic/finished | — | protein of unknown function                                         |
| FUMID1_v1_70096  | 2250744 | 2252174 | automatic/finished | — | secreted effector protein PipB2                                     |
| FUMID1_v1_70098  | 2252899 | 2254455 | automatic/finished | — | MFS transporter, DHA2 family, multidrug resistance protein          |
| FUMID1_v1_70099  | 2254460 | 2254975 | automatic/finished | — | protein of unknown function                                         |
| FUMID1_v1_70103  | 2258353 | 2258598 | automatic/finished | — | protein of unknown function                                         |
| FUMID1_v1_70104  | 2258390 | 2258461 | automatic/finished | — | protein of unknown function                                         |
| FUMID1_v1_70109  | 2262748 | 2263887 | automatic/finished | — | conserved protein of unknown function                               |
| FUMID1_v1_70110  | 2263661 | 2264119 | automatic/finished | — | protein of unknown function                                         |
| FUMID1_v1_70117  | 2269251 | 2269691 | automatic/finished | — | protein of unknown function                                         |
| FUMID1_v1_70127  | 2279721 | 2279900 | automatic/finished | — | protein of unknown function                                         |
| FUMID1_v1_70141  | 2291066 | 2291284 | automatic/finished | — | protein of unknown function                                         |
| FUMID1_v1_70149  | 2298303 | 2298947 | automatic/finished | — | protein of unknown function                                         |
| FUMID1_v1_70157  | 2308116 | 2308424 | automatic/finished | — | protein of unknown function                                         |
| FUMID1_v1_70161  | 2310365 | 2311174 | automatic/finished | — | protein of unknown function                                         |
| FUMID1_v1_70163  | 2312390 | 2313409 | automatic/finished | — | conserved protein of unknown function                               |
| FUMID1_v1_70164  | 2313415 | 2314305 | automatic/finished | — | DUF4097 domain-containing protein                                   |
| FUMID1_v1_70165  | 2314394 | 2315128 | automatic/finished | — | Toxin-antitoxin system HicB family antitoxin                        |
| FUMID1_v1_70174  | 2323715 | 2323984 | automatic/finished | — | protein of unknown function                                         |
| FUMID1_v1_70180  | 2329502 | 2329771 | automatic/finished | — | protein of unknown function                                         |
| FUMID1_v1_70182  | 2329506 | 2329904 | automatic/finished | — | protein of unknown function                                         |
| FUMID1_v1_70209  | 2363953 | 2364114 | automatic/finished | — | protein of unknown function                                         |
| FUMID1_v1_70240  | 2407527 | 2407736 | automatic/finished | — | protein of unknown function                                         |

|                  |         |         |                    |   |                                                                      |
|------------------|---------|---------|--------------------|---|----------------------------------------------------------------------|
| FUMID1_v1_710005 | 6338721 | 6338843 | automatic/finished | — | protein of unknown function                                          |
| FUMID1_v1_770001 | 6367201 | 6370389 | automatic/finished | — | protein of unknown function                                          |
| FUMID1_v1_770002 | 6370424 | 6371287 | automatic/finished | — | protein of unknown function                                          |
| FUMID1_v1_790006 | 6378553 | 6378852 | automatic/finished | — | protein of unknown function                                          |
| FUMID1_v1_80023  | 2451521 | 2451775 | automatic/finished | — | protein of unknown function                                          |
| FUMID1_v1_80024  | 2451910 | 2452083 | automatic/finished | — | protein of unknown function                                          |
| FUMID1_v1_80062  | 2490325 | 2490507 | automatic/finished | — | protein of unknown function                                          |
| FUMID1_v1_80090  | 2521001 | 2521129 | automatic/finished | — | protein of unknown function                                          |
| FUMID1_v1_80174  | 2623298 | 2623489 | automatic/finished | — | protein of unknown function                                          |
| FUMID1_v1_80181  | 2629579 | 2629854 | automatic/finished | — | protein of unknown function                                          |
| FUMID1_v1_80185  | 2634455 | 2634718 | automatic/finished | — | protein of unknown function                                          |
| FUMID1_v1_80201  | 2653411 | 2654652 | automatic/finished | — | conserved exported protein of unknown function                       |
| FUMID1_v1_80207  | 2661225 | 2661485 | automatic/finished | — | protein of unknown function                                          |
| FUMID1_v1_80210  | 2663575 | 2664375 | automatic/finished | — | exported protein of unknown function                                 |
| FUMID1_v1_870001 | 6395188 | 6395574 | automatic/finished | — | exported protein of unknown function                                 |
| FUMID1_v1_870003 | 6396402 | 6396638 | automatic/finished | — | protein of unknown function                                          |
| FUMID1_v1_90012  | 2689534 | 2689920 | automatic/finished | — | protein of unknown function                                          |
| FUMID1_v1_90015  | 2694120 | 2694290 | automatic/finished | — | protein of unknown function                                          |
| FUMID1_v1_90016  | 2694318 | 2694557 | automatic/finished | — | protein of unknown function                                          |
| FUMID1_v1_90024  | 2704260 | 2704958 | automatic/finished | — | putative Vitamin B12 ABC transporter, substrate-binding protein BtuF |
| FUMID1_v1_90028  | 2707194 | 2707583 | automatic/finished | — | conserved protein of unknown function                                |
| FUMID1_v1_90031  | 2708865 | 2709152 | automatic/finished | — | protein of unknown function                                          |
| FUMID1_v1_90069  | 2758624 | 2758764 | automatic/finished | — | protein of unknown function                                          |
| FUMID1_v1_90074  | 2763820 | 2764455 | automatic/finished | — | protein of unknown function                                          |
| FUMID1_v1_90082  | 2773256 | 2773978 | automatic/finished | — | exported protein of unknown function                                 |
| FUMID1_v1_90099  | 2795301 | 2795627 | automatic/finished | — | protein of unknown function                                          |
| FUMID1_v1_90102  | 2796862 | 2798985 | automatic/finished | — | Uncharacterized MFS-type transporter Rv1877                          |
| FUMID1_v1_90103  | 2799197 | 2799637 | automatic/finished | — | conserved protein of unknown function                                |
| FUMID1_v1_90104  | 2799770 | 2800084 | automatic/finished | — | conserved protein of unknown function                                |
| FUMID1_v1_90112  | 2809376 | 2809561 | automatic/finished | — | protein of unknown function                                          |
| FUMID1_v1_90121  | 2816946 | 2818010 | automatic/finished | — | conserved membrane protein of unknown function                       |
| FUMID1_v1_90139  | 2834095 | 2835195 | automatic/finished | — | protein of unknown function                                          |
| FUMID1_v1_90157  | 2852947 | 2853090 | automatic/finished | — | protein of unknown function                                          |
| FUMID1_v1_90161  | 2857702 | 2857902 | automatic/finished | — | protein of unknown function                                          |
| FUMID1_v1_90168  | 2863128 | 2863304 | automatic/finished | — | protein of unknown function                                          |
| FUMID1_v1_90178  | 2875207 | 2875383 | automatic/finished | — | protein of unknown function                                          |
| FUMID1_v1_930001 | 6405056 | 6405172 | automatic/finished | — | protein of unknown function                                          |
| FUMID1_v1_930002 | 6405227 | 6406402 | automatic/finished | — | transposase                                                          |
| FUMID1_v1_980001 | 6411831 | 6412664 | automatic/finished | — | protein of unknown function                                          |
| FUMID1_v1_980002 | 6412609 | 6412944 | automatic/finished | — | protein of unknown function                                          |

Genes of *Frankia alni* ACN14a with homologs in *Frankia* sp. QA3, *Frankia torreyi* Cpl1, *Frankia canadensis* ARgP5 without homologs in Ag45Mut15 and AgPM24  
Homology constraints: minLrap ≥ 0.8 ; maxLrap ≥ 0 ; Identity ≥ 50% similarities involved in a Synteny group

459 results

| Label     | Begin  | End    | Evidence             | Gene | Product                                                               |
|-----------|--------|--------|----------------------|------|-----------------------------------------------------------------------|
| FRAAL0088 | 88596  | 89819  | validated/inProgress | —    | hypothetical protein                                                  |
| FRAAL0090 | 91201  | 91689  | validated/inProgress | —    | hypothetical protein                                                  |
| FRAAL0093 | 94218  | 95675  | validated/inProgress | —    | putative RNA polymerase sigma factor                                  |
| FRAAL0100 | 102452 | 103693 | validated/finished   | —    | Conserved TM helix repeat-containing protein                          |
| FRAAL0119 | 119716 | 120345 | validated/inProgress | —    | hypothetical protein                                                  |
| FRAAL0127 | 127930 | 128742 | validated/finished   | —    | conserved protein of unknown function                                 |
| FRAAL0158 | 153451 | 154317 | validated/inProgress | —    | hypothetical protein                                                  |
| FRAAL0170 | 164784 | 166976 | validated/inProgress | —    | putative integral membrane protein                                    |
| FRAAL0173 | 171732 | 172211 | validated/inProgress | —    | hypothetical protein                                                  |
| FRAAL0175 | 173059 | 173580 | validated/inProgress | —    | putative transcriptional regulator                                    |
| FRAAL0176 | 173759 | 175267 | validated/inProgress | —    | putative membrane transport protein                                   |
| FRAAL0177 | 175624 | 177327 | validated/inProgress | —    | Putative transcriptional regulator (GntR-family)                      |
| FRAAL0199 | 195726 | 196838 | validated/inProgress | —    | Alcohol dehydrogenase                                                 |
| FRAAL0200 | 196889 | 198448 | validated/finished   | —    | NAD+-dependent betaine aldehyde dehydrogenase                         |
| FRAAL0268 | 286455 | 287486 | validated/inProgress | —    | conserved hypothetical protein; putative cobalamin synthesis protein. |
| FRAAL0277 | 295497 | 296351 | validated/inProgress | surE | acid phosphatase SurE, survival protein.                              |
| FRAAL0290 | 309655 | 310023 | validated/inProgress | —    | hypothetical protein                                                  |
| FRAAL0293 | 312840 | 314888 | validated/inProgress | thrS | Threonyl-tRNA synthetase (Threonine--tRNA ligase)                     |
| FRAAL0317 | 338179 | 339879 | validated/inProgress | —    | conserved hypothetical protein; putative endonuclease domain.         |
| FRAAL0321 | 344209 | 344997 | validated/inProgress | —    | short-chain dehydrogenase, SDR family.                                |
| FRAAL0346 | 374291 | 381133 | validated/inProgress | —    | putative Type I modular polyketide synthase                           |



|           |         |         |                      |      |                                                                                                         |
|-----------|---------|---------|----------------------|------|---------------------------------------------------------------------------------------------------------|
| FRAAL0347 | 381168  | 390587  | validated/inProgress | —    | putative Type I modular polyketide synthase                                                             |
| FRAAL0357 | 422435  | 423043  | validated/finished   | —    | Transcriptional regulator, TetR-family                                                                  |
| FRAAL0378 | 445636  | 446754  | validated/inProgress | —    | putative acyl-CoA dehydrogenase                                                                         |
| FRAAL0387 | 457062  | 457508  | validated/finished   | —    | conserved hypothetical protein                                                                          |
| FRAAL0393 | 462399  | 462824  | validated/inProgress | —    | MutT/nudix family protein                                                                               |
| FRAAL0400 | 470336  | 471010  | validated/finished   | —    | NIPSNAP domain containing protein                                                                       |
| FRAAL0401 | 471032  | 471658  | validated/finished   | —    | Putative oxidoreductase                                                                                 |
| FRAAL0402 | 471755  | 472417  | validated/inProgress | —    | putative regulatory protein                                                                             |
| FRAAL0406 | 475771  | 475986  | validated/inProgress | —    | conserved hypothetical protein                                                                          |
| FRAAL0407 | 476018  | 476431  | validated/inProgress | —    | hypothetical protein                                                                                    |
| FRAAL0452 | 519064  | 521865  | validated/finished   | —    | CRISPR-associated endonuclease/helicase Cas3                                                            |
| FRAAL0482 | 547196  | 548044  | validated/finished   | —    | Lysophospholipase                                                                                       |
| FRAAL0483 | 548111  | 549397  | validated/finished   | —    | Cytochrome P450                                                                                         |
| FRAAL0485 | 550001  | 550360  | validated/inProgress | —    | conserved hypothetical protein                                                                          |
| FRAAL0486 | 550357  | 550776  | validated/inProgress | —    | conserved hypothetical protein                                                                          |
| FRAAL0487 | 550805  | 553048  | validated/inProgress | —    | putative sensor-like histidine kinase                                                                   |
| FRAAL0520 | 582116  | 582394  | validated/inProgress | —    | hypothetical protein                                                                                    |
| FRAAL0521 | 582382  | 583542  | validated/inProgress | —    | Putative membrane protein (partial); putative signaling pathway G-protein coupled receptor protein      |
| FRAAL0522 | 583558  | 583713  | validated/inProgress | —    | hypothetical protein                                                                                    |
| FRAAL0533 | 592585  | 592902  | validated/inProgress | —    | conserved hypothetical protein                                                                          |
| FRAAL0582 | 638654  | 640453  | validated/inProgress | —    | Putative efflux membrane protein (partial match)                                                        |
| FRAAL0589 | 644899  | 645867  | validated/inProgress | —    | putative alkanesulfonate transport protein (ABC superfamily)                                            |
| FRAAL0592 | 647507  | 648631  | validated/inProgress | —    | putative ROK-family transcriptional regulator                                                           |
| FRAAL0607 | 667023  | 668045  | validated/inProgress | —    | putative alcohol dehydrogenase                                                                          |
| FRAAL0623 | 684144  | 684575  | validated/inProgress | —    | Putative transcriptional regulator                                                                      |
| FRAAL0662 | 722763  | 723911  | validated/finished   | —    | Heat shock protein DnaJ-like                                                                            |
| FRAAL0673 | 733761  | 734936  | validated/inProgress | —    | Putative DeoR family transcriptional regulator                                                          |
| FRAAL0674 | 735035  | 735511  | validated/inProgress | —    | hypothetical protein                                                                                    |
| FRAAL0708 | 770017  | 770952  | validated/inProgress | —    | putative non-haem bromoperoxidase (Bromide peroxidase)                                                  |
| FRAAL0710 | 771743  | 773248  | validated/inProgress | —    | hypothetical protein; putative signal peptide                                                           |
| FRAAL0716 | 777869  | 778285  | validated/inProgress | —    | hypothetical protein                                                                                    |
| FRAAL0735 | 793927  | 795675  | validated/inProgress | —    | putative acyl-CoA synthetase (long-chain-fatty-acid--CoA ligase)                                        |
| FRAAL0755 | 815411  | 817264  | validated/finished   | —    | putative protein-tyrosine kinase                                                                        |
| FRAAL0756 | 817342  | 818328  | validated/finished   | —    | C4-dicarboxylate ABC transporter substrate-binding protein                                              |
| FRAAL0764 | 826376  | 827392  | validated/inProgress | —    | putative oxidoreductase, NAD(P)-binding domain (partial match)                                          |
| FRAAL0765 | 827823  | 829124  | validated/inProgress | —    | putative RNA-binding protein                                                                            |
| FRAAL0769 | 834276  | 834728  | validated/inProgress | —    | Putative two component system response regulator                                                        |
| FRAAL0770 | 834912  | 835985  | validated/inProgress | —    | putative Ribokinase                                                                                     |
| FRAAL0771 | 836225  | 840175  | validated/inProgress | —    | putative signaling protein with a PAS domain                                                            |
| FRAAL0780 | 847610  | 848044  | validated/finished   | —    | putative ribokinase (C-terminal part)                                                                   |
| FRAAL0882 | 947399  | 949285  | validated/inProgress | —    | putative Beta-N-acetylglucosaminidase precursor                                                         |
| FRAAL0890 | 955919  | 960916  | validated/inProgress | —    | hypothetical protein; putative membrane protein                                                         |
| FRAAL0898 | 968449  | 969558  | validated/finished   | —    | Diguanylate cyclase with PAS/PAC sensor                                                                 |
| FRAAL0899 | 969948  | 970643  | validated/finished   | —    | conserved secreted protein of unknown function                                                          |
| FRAAL0923 | 991978  | 992346  | validated/inProgress | —    | hypothetical protein                                                                                    |
| FRAAL0924 | 992392  | 993444  | validated/inProgress | —    | Putative MarR-family transcriptional regulator; putative signal peptide                                 |
| FRAAL0932 | 1000703 | 1001158 | validated/inProgress | —    | hypothetical protein                                                                                    |
| FRAAL0947 | 1010461 | 1010562 | validated/finished   | —    | conserved protein of unknown function                                                                   |
| FRAAL0958 | 1020600 | 1021478 | validated/inProgress | —    | putative sugar transport system permease protein                                                        |
| FRAAL0959 | 1021475 | 1022446 | validated/inProgress | —    | putative permease protein of sugar ABC transporter precursor                                            |
| FRAAL0961 | 1023814 | 1025088 | validated/inProgress | —    | putative sugar transport ATP-hydrolyzing subunit (partial match)                                        |
| FRAAL0995 | 1062102 | 1063748 | validated/inProgress | —    | hypothetical protein; putative membrane protein                                                         |
| FRAAL1009 | 1080832 | 1081092 | validated/inProgress | —    | hypothetical protein                                                                                    |
| FRAAL1029 | 1101440 | 1102156 | validated/inProgress | —    | Hypothetical protein                                                                                    |
| FRAAL1143 | 1207861 | 1211076 | validated/finished   | —    | conserved membrane protein of unknown function                                                          |
| FRAAL1153 | 1224371 | 1225267 | validated/finished   | —    | Putative secreted lipase                                                                                |
| FRAAL1172 | 1244606 | 1245859 | validated/finished   | —    | Ribonuclease                                                                                            |
| FRAAL1185 | 1256920 | 1259220 | validated/inProgress | —    | putative ATP-dependent DNA helicase                                                                     |
| FRAAL1186 | 1259560 | 1259889 | validated/inProgress | —    | hypothetical protein                                                                                    |
| FRAAL1194 | 1269992 | 1271335 | validated/inProgress | deoA | thymidine phosphorylase                                                                                 |
| FRAAL1218 | 1296111 | 1297640 | validated/finished   | —    | hypothetical protein; putative XYPPX repeats                                                            |
| FRAAL1219 | 1298003 | 1298599 | validated/finished   | —    | Transcriptional regulator TetR-family                                                                   |
| FRAAL1256 | 1345820 | 1348627 | validated/inProgress | —    | hypothetical protein; putative membrane protein; putative ATP-binding region, ATPase-like domains       |
| FRAAL1282 | 1379834 | 1380352 | validated/inProgress | —    | Putative merR-family transcriptional regulator                                                          |
| FRAAL1283 | 1380562 | 1381887 | validated/inProgress | ahcY | Adenosylhomocysteinase (S-adenosyl-L-homocysteine hydrolase) (AdoHcyase)                                |
| FRAAL1295 | 1397391 | 1397840 | validated/finished   | —    | F420-dependent oxidoreductase                                                                           |
| FRAAL1307 | 1411393 | 1412250 | validated/finished   | —    | Conserved protein of unknown function                                                                   |
| FRAAL1308 | 1412278 | 1413723 | validated/finished   | —    | Putative Peptidoglycan-binding LysM domain                                                              |
| FRAAL1317 | 1420874 | 1422862 | validated/finished   | —    | hypothetical protein; putative coiled-coil domains; putative Chemotaxis protein histidine kinase domain |

|           |         |         |                      |      |                                                                                                                                                                                                                               |
|-----------|---------|---------|----------------------|------|-------------------------------------------------------------------------------------------------------------------------------------------------------------------------------------------------------------------------------|
| FRAAL1347 | 1454328 | 1455026 | validated/finished   | _    | transcriptional regulator, tetR family                                                                                                                                                                                        |
| FRAAL1385 | 1490363 | 1490650 | validated/finished   | _    | conserved hypothetical protein                                                                                                                                                                                                |
| FRAAL1391 | 1496547 | 1497299 | validated/finished   | _    | conserved protein of unknown function                                                                                                                                                                                         |
| FRAAL1420 | 1521664 | 1522461 | validated/finished   | _    | Nitrate/sulfonate ATP-binding cassette (ABC) transporter                                                                                                                                                                      |
| FRAAL1424 | 1526151 | 1528439 | validated/finished   | _    | Integral membrane export protein involved in sterol/hopanoic acid lipid transport                                                                                                                                             |
| FRAAL1445 | 1548865 | 1549098 | validated/finished   | _    | hypothetical protein; putative signal peptide                                                                                                                                                                                 |
| FRAAL1450 | 1553256 | 1554299 | validated/inProgress | _    | putative nitrate/sulfonate/bicarbonate ABC transporter substrate-binding protein                                                                                                                                              |
| FRAAL1451 | 1554383 | 1555180 | validated/inProgress | _    | putative ABC transporter ATP-binding protein                                                                                                                                                                                  |
| FRAAL1452 | 1555177 | 1556091 | validated/inProgress | _    | putative ABC transporter, permease protein                                                                                                                                                                                    |
| FRAAL1453 | 1556184 | 1556990 | validated/inProgress | _    | putative ABC transporter permease protein                                                                                                                                                                                     |
| FRAAL1457 | 1562364 | 1563296 | validated/finished   | xdhB | Xanthine dehydrogenase, FAD binding subunit                                                                                                                                                                                   |
| FRAAL1458 | 1563554 | 1563994 | validated/finished   | xdhC | Xanthine dehydrogenase, 2Fe-2S ferredoxin-like, small subunit                                                                                                                                                                 |
| FRAAL1459 | 1563984 | 1566416 | validated/finished   | xdhA | Xanthine dehydrogenase, large subunit; molybdenum cofactor-binding domain, Uric acid degradation bifunctional protein TTL [Includes: 2-oxo-4-hydroxy-4-carboxy-5-ureidoimidazole decarboxylase ; 5-hydroxyisourate hydrolase] |
| FRAAL1462 | 1569848 | 1570174 | validated/finished   | hiuH | hydrolase]                                                                                                                                                                                                                    |
| FRAAL1474 | 1580216 | 1581598 | validated/finished   | trzN | dehalogenase, putative metal-dependent atrazine dechlorinase                                                                                                                                                                  |
| FRAAL1507 | 1610195 | 1610572 | validated/finished   | _    | Conserved secreted protein of unknown function                                                                                                                                                                                |
| FRAAL1508 | 1610605 | 1611033 | validated/inProgress | _    | hypothetical protein; putative membrane protein                                                                                                                                                                               |
| FRAAL1515 | 1616812 | 1617387 | validated/inProgress | _    | hypothetical protein; putative signal peptide                                                                                                                                                                                 |
| FRAAL1572 | 1685865 | 1688729 | validated/inProgress | _    | hypothetical protein; putative membrane protein; putative ATPase-like domain                                                                                                                                                  |
| FRAAL1614 | 1736409 | 1737476 | validated/inProgress | _    | hypothetical protein                                                                                                                                                                                                          |
| FRAAL1620 | 1742123 | 1742959 | validated/inProgress | _    | conserved hypothetical protein; putative signal peptide                                                                                                                                                                       |
| FRAAL1637 | 1757918 | 1758949 | validated/inProgress | _    | alcohol dehydrogenase                                                                                                                                                                                                         |
| FRAAL1641 | 1764304 | 1765128 | validated/inProgress | _    | putative enoyl-CoA hydratase/isomerase                                                                                                                                                                                        |
| FRAAL1650 | 1769889 | 1770377 | validated/inProgress | _    | hypothetical protein                                                                                                                                                                                                          |
| FRAAL1656 | 1773708 | 1774622 | validated/finished   | _    | Enoyl-CoA hydratase                                                                                                                                                                                                           |
| FRAAL1658 | 1775310 | 1776332 | validated/finished   | _    | Two-component system response regulator, C-terminal effector domain of the bipartite response regulators                                                                                                                      |
| FRAAL1659 | 1776329 | 1777600 | validated/finished   | _    | Two-component system regulator, GAF domain                                                                                                                                                                                    |
| FRAAL1660 | 1777623 | 1778819 | validated/finished   | _    | Acyl-CoA dehydrogenase                                                                                                                                                                                                        |
| FRAAL1661 | 1779104 | 1779652 | validated/finished   | _    | Conserved protein of unknown function; snoAL and NTF domains                                                                                                                                                                  |
| FRAAL1662 | 1779701 | 1780270 | validated/finished   | _    | Conserved protein of unknown function; putative NTF2-like and Rhodopsin-like GPCR domains                                                                                                                                     |
| FRAAL1663 | 1780372 | 1782030 | validated/finished   | lcfB | Long-chain-fatty-acid--CoA ligase                                                                                                                                                                                             |
| FRAAL1664 | 1782156 | 1782641 | validated/finished   | _    | Flavin reductase domain protein, FMN-binding protein                                                                                                                                                                          |
| FRAAL1665 | 1782694 | 1784289 | validated/finished   | aldH | Acetaldehyde dehydrogenase                                                                                                                                                                                                    |
| FRAAL1666 | 1784249 | 1785430 | validated/finished   | fadE | Acyl-CoA dehydrogenase                                                                                                                                                                                                        |
| FRAAL1667 | 1785443 | 1787200 | validated/finished   | accD | acetyl/propionyl CoA carboxylase, beta subunit                                                                                                                                                                                |
| FRAAL1668 | 1787206 | 1789308 | validated/finished   | accC | Acetyl-/propionyl-coenzyme A carboxylase alpha chain [Includes: Biotin carboxylase; Biotin carboxyl carrier protein (BCCP)]                                                                                                   |
| FRAAL1683 | 1813299 | 1814228 | validated/inProgress | _    | Putative zinc-binding oxidoreductase                                                                                                                                                                                          |
| FRAAL1684 | 1814404 | 1815987 | validated/inProgress | _    | hypothetical protein; putative IMP dehydrogenase / GMP reductase domain                                                                                                                                                       |
| FRAAL1685 | 1816556 | 1818718 | validated/inProgress | _    | hypothetical protein; putative IMP dehydrogenase / GMP reductase domain                                                                                                                                                       |
| FRAAL1687 | 1824894 | 1825961 | validated/inProgress | _    | hypothetical protein                                                                                                                                                                                                          |
| FRAAL1691 | 1829447 | 1830628 | validated/inProgress | _    | Epoxide hydrolase                                                                                                                                                                                                             |
| FRAAL1710 | 1846684 | 1847937 | validated/inProgress | _    | Putative ATP/GTP binding protein                                                                                                                                                                                              |
| FRAAL1745 | 1873447 | 1875381 | validated/inProgress | _    | Tellurium resistance protein terE                                                                                                                                                                                             |
| FRAAL1749 | 1877569 | 1879200 | validated/finished   | _    | Aldehyde dehydrogenase                                                                                                                                                                                                        |
| FRAAL1753 | 1880790 | 1882274 | validated/inProgress | _    | Putative WD-40 repeat protein                                                                                                                                                                                                 |
| FRAAL1754 | 1883668 | 1885230 | validated/inProgress | _    | hypothetical protein                                                                                                                                                                                                          |
| FRAAL1755 | 1885541 | 1886998 | validated/inProgress | _    | Putative transcriptional regulator                                                                                                                                                                                            |
| FRAAL1758 | 1888058 | 1888417 | validated/inProgress | _    | hypothetical protein                                                                                                                                                                                                          |
| FRAAL1769 | 1897990 | 1898754 | validated/finished   | _    | conserved protein of unknown function                                                                                                                                                                                         |
| FRAAL1784 | 1918745 | 1918990 | validated/inProgress | _    | hypothetical protein                                                                                                                                                                                                          |
| FRAAL1786 | 1919989 | 1920543 | validated/inProgress | _    | hypothetical protein                                                                                                                                                                                                          |
| FRAAL1791 | 1924844 | 1926721 | validated/inProgress | lysS | Lysyl-tRNA synthetase (Lysine--tRNA ligase) (LysS)                                                                                                                                                                            |
| FRAAL1810 | 1947019 | 1948245 | validated/finished   | _    | Aromatic-ring hydroxylase                                                                                                                                                                                                     |
| FRAAL1812 | 1948928 | 1949299 | validated/finished   | _    | conserved protein of unknown function; putative Winged helix DNA-binding domain                                                                                                                                               |
| FRAAL1813 | 1949296 | 1949745 | validated/inProgress | _    | hypothetical protein                                                                                                                                                                                                          |
| FRAAL1814 | 1949742 | 1950935 | validated/inProgress | _    | Putative sensor-like histidine kinase                                                                                                                                                                                         |
| FRAAL1835 | 1976287 | 1976541 | validated/inProgress | _    | hypothetical protein                                                                                                                                                                                                          |
| FRAAL1840 | 1981040 | 1981759 | validated/finished   | ssb  | Single-strand DNA binding protein                                                                                                                                                                                             |
| FRAAL1886 | 2042441 | 2043811 | validated/inProgress | _    | Putative membrane transport protein                                                                                                                                                                                           |
| FRAAL1890 | 2046972 | 2048417 | validated/finished   | glxD | Glutamate synthase large subunit-like protein                                                                                                                                                                                 |
| FRAAL1891 | 2048420 | 2049667 | validated/inProgress | _    | putative sarcosine oxidase subunit beta                                                                                                                                                                                       |
| FRAAL1892 | 2049697 | 2050293 | validated/inProgress | _    | putative HTH-type transcriptional regulator                                                                                                                                                                                   |
| FRAAL1894 | 2051451 | 2053136 | validated/inProgress | _    | hypothetical protein                                                                                                                                                                                                          |
| FRAAL1895 | 2053146 | 2053919 | validated/inProgress | _    | putative Heat shock protein 16 (16 kDa heat shock protein)                                                                                                                                                                    |
| FRAAL1945 | 2113835 | 2114227 | validated/inProgress | _    | hypothetical protein; putative signal peptide                                                                                                                                                                                 |
| FRAAL1956 | 2123854 | 2124789 | validated/inProgress | _    | putative Quinone oxidoreductase                                                                                                                                                                                               |
| FRAAL1959 | 2126191 | 2127573 | validated/inProgress | _    | putative glycosyltransferase (N-glycosyltransferase) (N-glycosyl transferase NGT)                                                                                                                                             |
| FRAAL1988 | 2156975 | 2157661 | validated/inProgress | _    | putative secreted protein                                                                                                                                                                                                     |
| FRAAL1993 | 2161333 | 2162127 | validated/inProgress | _    | putative Tyrosine specific protein phosphatase                                                                                                                                                                                |

|           |         |         |                      |       |                                                                                                                  |
|-----------|---------|---------|----------------------|-------|------------------------------------------------------------------------------------------------------------------|
| FRAAL1994 | 2162256 | 2162849 | validated/inProgress | _     | hypothetical protein; putative membrane protein                                                                  |
| FRAAL2040 | 2213185 | 2214417 | validated/inProgress | _     | Putative glycosyl transferase                                                                                    |
| FRAAL2046 | 2220368 | 2221249 | validated/inProgress | _     | putative Glycosyl transferase-like protein                                                                       |
| FRAAL2142 | 2338845 | 2339186 | validated/inProgress | _     | hypothetical protein                                                                                             |
| FRAAL2208 | 2420975 | 2421763 | validated/inProgress | lspA  | Lipoprotein signal peptidase (Prolipoprotein signal peptidase) (Signal peptidase II) (SPase II) (partial match)  |
| FRAAL2241 | 2446828 | 2450469 | validated/inProgress | _     | Putative serine/threonine protein kinase                                                                         |
| FRAAL2306 | 2515113 | 2515754 | validated/inProgress | _     | conserved hypothetical protein                                                                                   |
| FRAAL2311 | 2519979 | 2520923 | validated/inProgress | purU  | formyltetrahydrofolate hydrolase                                                                                 |
| FRAAL2338 | 2556204 | 2556824 | validated/finished   | _     | hypothetical protein                                                                                             |
| FRAAL2345 | 2565031 | 2567202 | validated/inProgress | _     | hypothetical protein                                                                                             |
| FRAAL2349 | 2573783 | 2574739 | validated/inProgress | _     | Putative sugar kinase                                                                                            |
| FRAAL2354 | 2578819 | 2580321 | validated/finished   | _     | Transcriptional regulator, XRE family                                                                            |
| FRAAL2359 | 2586449 | 2587117 | validated/inProgress | _     | Putative tetR-family transcriptional regulator                                                                   |
| FRAAL2362 | 2589788 | 2590942 | validated/inProgress | _     | Acyl-CoA dehydrogenase, long-chain specific (LCAD)                                                               |
| FRAAL2363 | 2591607 | 2593232 | validated/inProgress | _     | putative ABC transporter ATP-binding protein; putative galactose-binding domain                                  |
| FRAAL2366 | 2594387 | 2596000 | validated/inProgress | _     | Putative transmembrane efflux protein                                                                            |
| FRAAL2374 | 2600288 | 2601460 | validated/inProgress | _     | hypothetical protein                                                                                             |
| FRAAL2384 | 2610315 | 2611157 | validated/inProgress | _     | putative ABC-type transporter ATP-binding protein protein; part of putative ABC transporter of unknown substrate |
| FRAAL2388 | 2614407 | 2614790 | validated/inProgress | hypA1 | Hydrogenase nickel incorporation protein hypA                                                                    |
| FRAAL2389 | 2614909 | 2615688 | validated/inProgress | hypB1 | hydrogenase-3 accessory protein for metallocenter assembly with P-loop containing NTP hydrolase domain           |
| FRAAL2390 | 2615884 | 2617422 | validated/inProgress | _     | conserved hypothetical protein                                                                                   |
| FRAAL2391 | 2617419 | 2617943 | validated/inProgress | hupD1 | Hydrogenase maturation protein hupD                                                                              |
| FRAAL2392 | 2617962 | 2619041 | validated/inProgress | hupS1 | uptake hydrogenase small subunit precursor (Hydrogenlyase) (Membrane-bound hydrogenase small subunit)            |
| FRAAL2393 | 2619041 | 2620834 | validated/inProgress | hupL1 | Uptake hydrogenase large subunit (Hydrogenlyase) (Membrane-bound hydrogenase large subunit)                      |
| FRAAL2394 | 2620947 | 2621489 | validated/finished   | _     | Thioredoxin-like protein                                                                                         |
| FRAAL2395 | 2621486 | 2622343 | validated/finished   | _     | conserved protein of unknown function                                                                            |
| FRAAL2396 | 2622397 | 2622606 | validated/inProgress | _     | hypothetical protein                                                                                             |
| FRAAL2404 | 2629554 | 2630336 | validated/inProgress | _     | conserved hypothetical protein                                                                                   |
| FRAAL2428 | 2649094 | 2649609 | validated/inProgress | _     | putative NADH dehydrogenase/NAD(P)H nitroreductase                                                               |
| FRAAL2435 | 2654768 | 2655430 | validated/inProgress | _     | putative acyl carrier protein phosphodiesterase 1 (ACP phosphodiesterase 1)                                      |
| FRAAL2462 | 2683581 | 2684033 | validated/inProgress | _     | conserved hypothetical protein                                                                                   |
| FRAAL2468 | 2688530 | 2689561 | validated/inProgress | _     | Esterase                                                                                                         |
| FRAAL2480 | 2698844 | 2700802 | validated/inProgress | _     | putative ABC transporter ATP-binding protein                                                                     |
| FRAAL2481 | 2700795 | 2702645 | validated/inProgress | _     | putative antibiotic ABC transporter ATP-binding protein                                                          |
| FRAAL2504 | 2725615 | 2726265 | validated/finished   | atoA  | acetyl-CoA:acetoacetyl-CoA transferase, beta subunit                                                             |
| FRAAL2513 | 2734026 | 2735231 | validated/inProgress | _     | Putative Acyl-CoA dehydrogenase                                                                                  |
| FRAAL2519 | 2739295 | 2740122 | validated/inProgress | _     | Putative short-chain dehydrogenase                                                                               |
| FRAAL2525 | 2743899 | 2744792 | validated/inProgress | _     | Putative short-chain dehydrogenase                                                                               |
| FRAAL2625 | 2870775 | 2871917 | validated/inProgress | _     | Acyl-CoA dehydrogenase, long-chain specific                                                                      |
| FRAAL2634 | 2879472 | 2880542 | validated/finished   | _     | Putative amidohydrolase (upregulated upon contact with naphtenic acid)                                           |
| FRAAL2649 | 2900680 | 2901351 | validated/inProgress | _     | Putative transposase (partial)                                                                                   |
| FRAAL2792 | 3015025 | 3016173 | validated/inProgress | acd   | Butyryl-CoA dehydrogenase                                                                                        |
| FRAAL2813 | 3033731 | 3035203 | validated/inProgress | _     | hypothetical protein                                                                                             |
| FRAAL2837 | 3063663 | 3064883 | validated/inProgress | _     | hypothetical protein                                                                                             |
| FRAAL2855 | 3086435 | 3086977 | validated/inProgress | _     | conserved hypothetical protein                                                                                   |
| FRAAL2903 | 3140673 | 3141830 | validated/inProgress | _     | UDP glycosyltransferase                                                                                          |
| FRAAL2910 | 3147115 | 3148482 | validated/inProgress | _     | UDP-glucuronosyltransferase                                                                                      |
| FRAAL2928 | 3171890 | 3172174 | validated/finished   | _     | Putative HNH endonuclease                                                                                        |
| FRAAL2954 | 3192502 | 3193758 | validated/inProgress | _     | conserved hypothetical protein                                                                                   |
| FRAAL2981 | 3249642 | 3251177 | validated/inProgress | _     | putative two-component sensor                                                                                    |
| FRAAL3025 | 3299097 | 3299528 | validated/inProgress | gvpA  | Gas vesicle protein A                                                                                            |
| FRAAL3026 | 3299630 | 3300352 | validated/finished   | gvpF  | Gas vesicle protein F                                                                                            |
| FRAAL3028 | 3301047 | 3302054 | validated/finished   | _     | Polyketide cyclase in gvp synton                                                                                 |
| FRAAL3029 | 3302167 | 3302649 | validated/inProgress | _     | conserved hypothetical protein                                                                                   |
| FRAAL3030 | 3302661 | 3303101 | validated/finished   | _     | Transcriptional regulator, ArsR family                                                                           |
| FRAAL3032 | 3303988 | 3305496 | validated/inProgress | _     | conserved hypothetical protein                                                                                   |
| FRAAL3034 | 3306387 | 3306974 | validated/inProgress | _     | conserved hypothetical protein; putative membrane protein                                                        |
| FRAAL3039 | 3311671 | 3312699 | validated/inProgress | pdhA  | Pyruvate dehydrogenase E1 component, alpha subunit                                                               |
| FRAAL3040 | 3312696 | 3313706 | validated/inProgress | pdhB  | Pyruvate dehydrogenase, beta subunit (Lipoamide). (pdhB-2)                                                       |
| FRAAL3041 | 3313766 | 3313996 | validated/inProgress | _     | putative Dihydrolipoamide acyltransferases                                                                       |
| FRAAL3050 | 3324505 | 3325218 | validated/inProgress | _     | hypothetical protein                                                                                             |
| FRAAL3063 | 3336920 | 3338002 | validated/finished   | _     | ABC-type branched-chain amino acid transporter                                                                   |
| FRAAL3078 | 3350285 | 3351217 | validated/inProgress | _     | transposase                                                                                                      |
| FRAAL3080 | 3352700 | 3353941 | validated/inProgress | _     | transposase                                                                                                      |
| FRAAL3116 | 3385004 | 3385582 | validated/inProgress | _     | conserved hypothetical protein; putative oxidoreductase activity                                                 |
| FRAAL3141 | 3412771 | 3414414 | validated/finished   | _     | Protein of unknown function; putative His-Me finger endonucleases domain                                         |
| FRAAL3144 | 3416870 | 3418051 | validated/finished   | _     | Acyl-CoA dehydrogenase, long-chain specific                                                                      |
| FRAAL3148 | 3421985 | 3422821 | validated/finished   | scoA  | succinyl-CoA:3-ketoacid-coenzyme A transferase subunit A (Succinyl CoA:3-oxoacid CoA-transferase) (OXCT A)       |
| FRAAL3149 | 3422818 | 3423459 | validated/finished   | atoA  | acetyl-CoA:acetoacetyl-CoA transferase, beta subunit                                                             |

|           |         |         |                      |      |                                                                                                      |
|-----------|---------|---------|----------------------|------|------------------------------------------------------------------------------------------------------|
| FRAAL3238 | 3521962 | 3522543 | validated/inProgress | _    | hypothetical protein                                                                                 |
| FRAAL3250 | 3534207 | 3535754 | validated/inProgress | _    | Putative efflux membrane protein                                                                     |
| FRAAL3271 | 3560729 | 3561160 | validated/inProgress | _    | Putative regulatory protein                                                                          |
| FRAAL3310 | 3595499 | 3595759 | validated/inProgress | _    | conserved hypothetical protein                                                                       |
| FRAAL3311 | 3595756 | 3596136 | validated/inProgress | _    | conserved hypothetical protein                                                                       |
| FRAAL3347 | 3627931 | 3628752 | validated/finished   | _    | hypothetical protein                                                                                 |
| FRAAL3383 | 3667656 | 3668603 | validated/inProgress | _    | hypothetical protein; putative signal peptide; putative Phenylacetic acid degradation-related domain |
| FRAAL3387 | 3671344 | 3672951 | validated/inProgress | _    | Cyclohexanone monooxygenase                                                                          |
| FRAAL3411 | 3695178 | 3696641 | validated/finished   | aldH | Aminobutyraldehyde dehydrogenase                                                                     |
| FRAAL3415 | 3698934 | 3700385 | validated/inProgress | _    | hypothetical protein; putative HNH endonuclease domain                                               |
| FRAAL3416 | 3700529 | 3701698 | validated/inProgress | _    | Putative Acyl-CoA dehydrogenase                                                                      |
| FRAAL3417 | 3701792 | 3702430 | validated/inProgress | _    | putative Transcriptional regulator                                                                   |
| FRAAL3422 | 3707664 | 3708590 | validated/inProgress | _    | putative short-chain dehydrogenase/reductase                                                         |
| FRAAL3448 | 3736763 | 3737938 | validated/inProgress | glpQ | Glycerophosphoryl diester phosphodiesteraseglycerophosphoryl diester phosphodiesterase               |
| FRAAL3464 | 3753291 | 3754517 | validated/finished   | _    | Acyl-CoA dehydrogenase                                                                               |
| FRAAL3467 | 3755721 | 3756947 | validated/finished   | _    | Branched-chain amino acid-binding lipoprotein transmembrane                                          |
| FRAAL3484 | 3774586 | 3775482 | validated/finished   | _    | Enoyl-CoA hydratase                                                                                  |
| FRAAL3512 | 3805159 | 3806751 | validated/inProgress | _    | Putative fatty-acid--CoA ligase                                                                      |
| FRAAL3514 | 3807920 | 3809206 | validated/inProgress | _    | putative acyl-CoA dehydrogenase                                                                      |
| FRAAL3515 | 3809497 | 3810309 | validated/inProgress | _    | putative oxidoreductase, short-chain dehydrogenase/reductase family                                  |
| FRAAL3539 | 3839288 | 3840040 | validated/inProgress | _    | putative oxidoreductase, NAD(P)-binding domain                                                       |
| FRAAL3553 | 3853255 | 3854721 | validated/inProgress | _    | Putative acyl-CoA synthetase, long- chain fatty acid:CoA ligase                                      |
| FRAAL3560 | 3861516 | 3862277 | validated/inProgress | _    | putative 3-oxoacyl-[acyl-carrier protein] reductase                                                  |
| FRAAL3574 | 3872399 | 3872962 | validated/inProgress | _    | hypothetical protein; putative domain                                                                |
| FRAAL3605 | 3899533 | 3900276 | validated/inProgress | _    | hypothetical protein                                                                                 |
| FRAAL3610 | 3903567 | 3904298 | validated/inProgress | _    | Putative oxidoreductase; (Related to short-chain alcohol dehydrogenases)                             |
| FRAAL3611 | 3904511 | 3905029 | validated/inProgress | _    | Putative MarR-family transcriptional regulator                                                       |
| FRAAL3620 | 3915729 | 3916526 | validated/inProgress | _    | hypothetical protein; putative NAD(P)-binding Rossmann-fold domain                                   |
| FRAAL3621 | 3916792 | 3917361 | validated/inProgress | _    | putative TetR-family transcriptional regulator                                                       |
| FRAAL3664 | 3950438 | 3951334 | validated/inProgress | _    | conserved hypothetical protein; putative nuclease domain                                             |
| FRAAL3669 | 3954375 | 3954974 | validated/inProgress | _    | hypothetical protein                                                                                 |
| FRAAL3670 | 3954977 | 3955435 | validated/inProgress | _    | putative Transcriptional regulator                                                                   |
| FRAAL3695 | 3974029 | 3974673 | validated/inProgress | _    | Putative secreted protein (partial)                                                                  |
| FRAAL3703 | 3980982 | 3981830 | validated/inProgress | _    | conserved hypothetical protein                                                                       |
| FRAAL3704 | 3981742 | 3982344 | validated/inProgress | _    | putative TetR-family transcriptional regulator                                                       |
| FRAAL3738 | 4014415 | 4014807 | validated/inProgress | _    | Putative transcriptional regulator (partial match)                                                   |
| FRAAL3795 | 4070112 | 4070708 | validated/inProgress | _    | putative TetR-family transcriptional regulator                                                       |
| FRAAL3799 | 4075323 | 4076087 | validated/inProgress | _    | Enoyl-CoA hydratase                                                                                  |
| FRAAL3800 | 4076683 | 4077897 | validated/inProgress | _    | hypothetical protein; putative signal peptide                                                        |
| FRAAL3811 | 4090826 | 4091698 | validated/inProgress | _    | putative ABC-type uncharacterized transport system, substrate-binding protein, membrane component    |
| FRAAL3813 | 4092636 | 4093436 | validated/inProgress | _    | ABC transporter ATP-binding protein                                                                  |
| FRAAL3822 | 4099716 | 4101056 | validated/inProgress | _    | putative multidrug resistance integral membrane efflux protein                                       |
| FRAAL3823 | 4101273 | 4101950 | validated/inProgress | _    | putative TetR family transcriptional regulator                                                       |
| FRAAL3825 | 4103582 | 4103776 | validated/inProgress | _    | Putative ferredoxin (partial)                                                                        |
| FRAAL3834 | 4112440 | 4112958 | validated/finished   | _    | Flavin-dependent reductase, FMN-binding                                                              |
| FRAAL3836 | 4114604 | 4115446 | validated/inProgress | _    | putative O-methyltransferase involved in polyketide biosynthesis                                     |
| FRAAL3851 | 4127005 | 4129416 | validated/inProgress | _    | putative serine/threonine protein kinase                                                             |
| FRAAL3853 | 4129974 | 4130591 | validated/finished   | _    | Transcriptional regulator, TetR family                                                               |
| FRAAL3891 | 4179775 | 4181097 | validated/inProgress | _    | putative secreted protein                                                                            |
| FRAAL3893 | 4181145 | 4182197 | validated/inProgress | _    | putative ABC transporter glutamine-binding protein GlnH                                              |
| FRAAL3896 | 4186550 | 4187530 | validated/inProgress | _    | Putative protein phosphatase                                                                         |
| FRAAL3897 | 4187511 | 4188839 | validated/inProgress | _    | conserved hypothetical protein                                                                       |
| FRAAL3898 | 4189025 | 4189429 | validated/inProgress | _    | hypothetical protein                                                                                 |
| FRAAL3901 | 4193272 | 4195026 | validated/inProgress | _    | putative Phytoene dehydrogenase                                                                      |
| FRAAL3961 | 4260931 | 4262001 | validated/inProgress | _    | putative Trypsin-like serine proteases                                                               |
| FRAAL3970 | 4267938 | 4268750 | validated/inProgress | _    | putative repressor                                                                                   |
| FRAAL3971 | 4268933 | 4270000 | validated/inProgress | _    | putative short-chain acyl dehydrogenase                                                              |
| FRAAL4021 | 4325363 | 4326607 | validated/inProgress | _    | putative Sigma factor PP2C-like phosphatases                                                         |
| FRAAL4022 | 4326796 | 4332276 | validated/inProgress | _    | Putative two component sensor serine/threonine kinase                                                |
| FRAAL4067 | 4370645 | 4371502 | validated/inProgress | _    | conserved hypothetical protein                                                                       |
| FRAAL4087 | 4422039 | 4422824 | validated/inProgress | _    | putative dipeptide transport protein (ABC superfamily, membrane)                                     |
| FRAAL4088 | 4422958 | 4423875 | validated/inProgress | _    | ABC transporter permease                                                                             |
| FRAAL4126 | 4457663 | 4458835 | validated/inProgress | _    | hypothetical protein; putative membrane protein                                                      |
| FRAAL4180 | 4542761 | 4543153 | validated/inProgress | _    | conserved hypothetical protein                                                                       |
| FRAAL4187 | 4548805 | 4550193 | validated/inProgress | _    | hypothetical protein                                                                                 |
| FRAAL4221 | 4586965 | 4588062 | validated/inProgress | _    | conserved hypothetical protein                                                                       |
| FRAAL4222 | 4588626 | 4589168 | validated/inProgress | _    | conserved hypothetical protein; putative signal peptide                                              |
| FRAAL4239 | 4601176 | 4601829 | validated/finished   | _    | Putative Rho termination factor, N-terminal domain                                                   |
| FRAAL4242 | 4604749 | 4605792 | validated/inProgress | _    | hypothetical protein                                                                                 |

|           |         |         |                      |      |                                                                                 |
|-----------|---------|---------|----------------------|------|---------------------------------------------------------------------------------|
| FRAAL4259 | 4623650 | 4624054 | validated/inProgress | —    | Putative HTH-type transcriptional regulator                                     |
| FRAAL4291 | 4650565 | 4650885 | validated/inProgress | —    | hypothetical protein                                                            |
| FRAAL4294 | 4653546 | 4654313 | validated/inProgress | —    | hypothetical protein; putative signal peptide                                   |
| FRAAL4320 | 4685412 | 4686725 | validated/inProgress | —    | putative hydroxylase                                                            |
| FRAAL4340 | 4708356 | 4709603 | validated/finished   | —    | hypothetical protein; putative membrane protein                                 |
| FRAAL4361 | 4733618 | 4735462 | validated/inProgress | —    | Conserved hypothetical protein                                                  |
| FRAAL4364 | 4738725 | 4739636 | validated/inProgress | —    | putative RpiR familytranscriptional regulator with phosphosugar-binding domain  |
| FRAAL4404 | 4786199 | 4786375 | validated/inProgress | —    | hypothetical protein                                                            |
| FRAAL4421 | 4808582 | 4809514 | validated/inProgress | —    | putative FMN reductase                                                          |
| FRAAL4422 | 4809770 | 4810663 | validated/inProgress | —    | putative Coenzyme F420-dependent reductase                                      |
| FRAAL4430 | 4818938 | 4819291 | validated/finished   | —    | Putative surface carbohydrate-binding protein                                   |
| FRAAL4437 | 4824109 | 4824558 | validated/inProgress | —    | hypothetical protein                                                            |
| FRAAL4441 | 4827755 | 4828603 | validated/inProgress | —    | putative lysR-type transcriptional regulator                                    |
| FRAAL4446 | 4832058 | 4833722 | validated/inProgress | —    | putative ABC transporter dipeptide/oligopeptide binding protein                 |
| FRAAL4447 | 4833719 | 4834807 | validated/inProgress | —    | Putative ABC-type dipeptide/oligopeptide transport system, permease component   |
| FRAAL4448 | 4834939 | 4835730 | validated/inProgress | —    | Putative dipeptide/oligopeptide ABC transporter permease                        |
| FRAAL4498 | 4884005 | 4884364 | validated/inProgress | —    | hypothetical protein                                                            |
| FRAAL4531 | 4919186 | 4920340 | validated/inProgress | —    | putative transcription regulator                                                |
| FRAAL4539 | 4928433 | 4930289 | validated/inProgress | —    | Putative ABC-type transport system, ATPase and permease components              |
| FRAAL4540 | 4930448 | 4931344 | validated/finished   | —    | Enoyl-CoA hydratase/isomerase                                                   |
| FRAAL4710 | 5097449 | 5098309 | validated/inProgress | —    | Putative oxidoreductase, short-chain alcohol dehydrogenase family               |
| FRAAL4713 | 5100184 | 5101143 | validated/finished   | —    | Putative enoyl-CoA hydratase/isomerase                                          |
| FRAAL4715 | 5101895 | 5102488 | validated/inProgress | —    | Putative transcriptional regulator of the TetR family                           |
| FRAAL4716 | 5102637 | 5103398 | validated/inProgress | —    | Putative oxidoreductase                                                         |
| FRAAL4721 | 5107346 | 5108296 | validated/inProgress | —    | hypothetical protein; putative signal peptide                                   |
| FRAAL4722 | 5108466 | 5110484 | validated/finished   | —    | putative ATP-binding component of an ABC transport protein                      |
| FRAAL4728 | 5120334 | 5120582 | validated/inProgress | —    | hypothetical protein                                                            |
| FRAAL4730 | 5121133 | 5122752 | validated/finished   | —    | Putative permease of the major facilitator superfamily                          |
| FRAAL4747 | 5139365 | 5140288 | validated/inProgress | —    | Putative stress-inducible protein; putative adenine nucleotide-binding domain   |
| FRAAL4749 | 5142847 | 5144160 | validated/inProgress | —    | putative membrane protein                                                       |
| FRAAL4751 | 5144435 | 5144983 | validated/inProgress | —    | putative tetR family transcriptional regulator                                  |
| FRAAL4755 | 5147703 | 5148992 | validated/inProgress | —    | putative membrane phosphatase                                                   |
| FRAAL4764 | 5157858 | 5160299 | validated/inProgress | —    | conserved hypothetical protein; putative Formyl-CoA transferase                 |
| FRAAL4765 | 5160385 | 5162766 | validated/inProgress | —    | Putative enoyl-CoA hydratase                                                    |
| FRAAL4766 | 5162773 | 5163621 | validated/inProgress | —    | Putative enoyl-CoA hydratase/isomerase                                          |
| FRAAL4767 | 5163740 | 5164579 | validated/inProgress | —    | putative acyl-CoA thioesterase                                                  |
| FRAAL4781 | 5178512 | 5179087 | validated/finished   | —    | Acyl-coenzyme A thioesterase                                                    |
| FRAAL4782 | 5179208 | 5179780 | validated/finished   | —    | Putative acyl-coenzyme A thioesterase                                           |
| FRAAL4791 | 5189285 | 5190373 | validated/inProgress | —    | Putative monooxygenase.                                                         |
| FRAAL4797 | 5196418 | 5197452 | validated/inProgress | —    | Putative dipeptide transport protein of the ABC superfamily, membrane component |
| FRAAL4798 | 5197595 | 5199163 | validated/inProgress | —    | Putative dipeptide ABC transporter precursor, membrane component                |
| FRAAL4802 | 5202157 | 5203092 | validated/inProgress | —    | putative monooxygenase                                                          |
| FRAAL4803 | 5203291 | 5203914 | validated/inProgress | —    | Putative TetR family transcriptional regulator                                  |
| FRAAL4830 | 5226751 | 5227884 | validated/inProgress | ssuD | alkanesulfonate monooxygenase, FMNH(2)-dependent                                |
| FRAAL4832 | 5229094 | 5230455 | validated/inProgress | —    | putative monooxygenase                                                          |
| FRAAL4833 | 5230452 | 5231954 | validated/inProgress | —    | Putative monooxygenase                                                          |
| FRAAL4837 | 5234934 | 5235986 | validated/inProgress | dppC | ABC-type dipeptide/oligopeptide/nickel transport systems, permease component    |
| FRAAL4838 | 5235983 | 5236933 | validated/inProgress | dppB | ABC-type dipeptide/oligopeptide/nickel transport systems, permease component    |
| FRAAL4839 | 5236980 | 5238500 | validated/finished   | —    | ABC peptide transporter; membrane component                                     |
| FRAAL4841 | 5239217 | 5240326 | validated/inProgress | —    | putative oxygenase                                                              |
| FRAAL4847 | 5245909 | 5246877 | validated/inProgress | —    | putative zinc-binding NADP-dependent dehydrogenase                              |
| FRAAL4852 | 5251721 | 5252518 | validated/inProgress | —    | Putative transcriptional regulator (GntR-family)                                |
| FRAAL4879 | 5280485 | 5281630 | validated/finished   | —    | amidohydrolase                                                                  |
| FRAAL4895 | 5296328 | 5296780 | validated/finished   | —    | putative cation transporter regulator                                           |
| FRAAL4909 | 5320755 | 5321405 | validated/inProgress | —    | MutT/nudix family protein                                                       |
| FRAAL4911 | 5322309 | 5323076 | validated/inProgress | —    | Chitooligosaccharide deacetylase (Nodulation protein B homolog) (partial match) |
| FRAAL4930 | 5342018 | 5343205 | validated/inProgress | —    | conserved hypothetical protein; putative monooxygenase                          |
| FRAAL4941 | 5352674 | 5353468 | validated/inProgress | —    | putative Guanidinoacetate N-methyltransferase                                   |
| FRAAL4959 | 5380087 | 5380935 | validated/finished   | —    | Putative tryptophan-associated membrane protein                                 |
| FRAAL5000 | 5428413 | 5428982 | validated/inProgress | —    | hypothetical protein                                                            |
| FRAAL5013 | 5441040 | 5442581 | validated/inProgress | —    | hypothetical protein                                                            |
| FRAAL5020 | 5454412 | 5454918 | validated/inProgress | —    | hypothetical protein                                                            |
| FRAAL5030 | 5461276 | 5461773 | validated/inProgress | —    | hypothetical protein; putative signal peptide                                   |
| FRAAL5032 | 5461899 | 5462939 | validated/inProgress | —    | hypothetical protein; putative signal peptide                                   |
| FRAAL5033 | 5462999 | 5464180 | validated/finished   | —    | Secreted subtilisin-like serine protease                                        |
| FRAAL5041 | 5473499 | 5474710 | validated/inProgress | —    | putative HTH-type transcriptional regulator                                     |
| FRAAL5158 | 5591916 | 5592224 | validated/finished   | —    | Protein of unknown function                                                     |
| FRAAL5185 | 5621241 | 5621579 | validated/inProgress | —    | conserved hypothetical protein                                                  |
| FRAAL5217 | 5654405 | 5655577 | validated/inProgress | —    | hypothetical protein                                                            |

|           |         |         |                      |      |                                                                                  |
|-----------|---------|---------|----------------------|------|----------------------------------------------------------------------------------|
| FRAAL5285 | 5730463 | 5731536 | validated/finished   | —    | Putative amidohydrolase                                                          |
| FRAAL5341 | 5798506 | 5800242 | validated/finished   | —    | putative oxidoreductase                                                          |
| FRAAL5351 | 5806376 | 5808145 | validated/inProgress | —    | Putative Na <sup>+</sup> /H <sup>+</sup> antiporter; putative membrane protein   |
| FRAAL5352 | 5808100 | 5809557 | validated/inProgress | —    | Putative regulatory protein                                                      |
| FRAAL5354 | 5810702 | 5811550 | validated/inProgress | —    | hypothetical protein                                                             |
| FRAAL5360 | 5814786 | 5815844 | validated/inProgress | —    | hypothetical protein; putative signal peptide                                    |
| FRAAL5361 | 5815795 | 5816559 | validated/inProgress | —    | hypothetical protein; putative sortase domain                                    |
| FRAAL5387 | 5839347 | 5841125 | validated/inProgress | —    | putative ATP-binding ABC transporter protein                                     |
| FRAAL5388 | 5841206 | 5842114 | validated/inProgress | —    | putative dipeptide transport protein (ABC superfamily, membrane)                 |
| FRAAL5389 | 5842118 | 5843140 | validated/inProgress | —    | putative ABC transporter permease protein                                        |
| FRAAL5415 | 5871724 | 5872071 | validated/inProgress | —    | hypothetical protein; putative carboxymuconolactone decarboxylase domain         |
| FRAAL5476 | 5921166 | 5922083 | validated/inProgress | —    | conserved hypothetical protein                                                   |
| FRAAL5483 | 5930092 | 5930880 | validated/finished   | echA | Enoyl-CoA hydratase                                                              |
| FRAAL5515 | 5963181 | 5964449 | validated/inProgress | —    | Putative lipoprotein                                                             |
| FRAAL5531 | 5980024 | 5980212 | validated/inProgress | —    | hypothetical protein                                                             |
| FRAAL5536 | 5983711 | 5984220 | validated/inProgress | —    | hypothetical protein                                                             |
| FRAAL5540 | 5986427 | 5986906 | validated/inProgress | —    | Conserved hypothetical protein                                                   |
| FRAAL5553 | 6003814 | 6004155 | validated/inProgress | —    | hypothetical protein; putative signal peptide                                    |
| FRAAL5568 | 6019001 | 6019663 | validated/inProgress | —    | Antibiotic resistance protein                                                    |
| FRAAL5572 | 6022912 | 6025518 | validated/finished   | —    | Putative transcriptional regulator                                               |
| FRAAL5600 | 6045711 | 6046568 | validated/inProgress | —    | putative DNA-binding protein                                                     |
| FRAAL5605 | 6049437 | 6050432 | validated/inProgress | —    | Transcriptional regulator (AraC-family)                                          |
| FRAAL5607 | 6051507 | 6051722 | validated/inProgress | —    | Hypothetical protein                                                             |
| FRAAL5610 | 6053610 | 6056123 | validated/inProgress | —    | hypothetical protein                                                             |
| FRAAL5611 | 6056179 | 6057525 | validated/inProgress | —    | hypothetical protein                                                             |
| FRAAL5628 | 6078867 | 6080012 | validated/inProgress | —    | Hypothetical protein; putative TolB protein precursor                            |
| FRAAL5629 | 6080056 | 6080685 | validated/inProgress | —    | putative Redox-sensitive soxR-family transcriptional activator                   |
| FRAAL5650 | 6105098 | 6107560 | validated/inProgress | —    | conserved hypothetical protein; putative membrane protein                        |
| FRAAL5663 | 6124118 | 6125008 | validated/inProgress | —    | hypothetical protein; putative Acetyltransferases (isoleucine patch superfamily) |
| FRAAL5683 | 6144570 | 6146495 | validated/finished   | —    | Putative DNA-binding protein                                                     |
| FRAAL5700 | 6173245 | 6173919 | validated/inProgress | —    | Putative regulatory protein nrdR                                                 |
| FRAAL5761 | 6246528 | 6246719 | validated/inProgress | —    | hypothetical protein                                                             |
| FRAAL5800 | 6286271 | 6287068 | validated/finished   | —    | hypothetical protein; putative aromatic acid decarboxylase                       |
| FRAAL5848 | 6332472 | 6334064 | validated/inProgress | serA | D-3-phosphoglycerate dehydrogenase (PGDH)                                        |
| FRAAL5875 | 6364641 | 6365477 | validated/finished   | —    | Putative oxidoreductase                                                          |
| FRAAL5908 | 6412080 | 6412550 | validated/finished   | —    | conserved protein of unknown function                                            |
| FRAAL5923 | 6427160 | 6427525 | validated/finished   | —    | Anti-sigma factor antagonist                                                     |
| FRAAL5928 | 6430643 | 6430888 | validated/inProgress | —    | hypothetical protein                                                             |
| FRAAL5929 | 6430915 | 6431226 | validated/inProgress | —    | Hypothetical protein                                                             |
| FRAAL6013 | 6517875 | 6519314 | validated/finished   | amiB | Amidase, Asp-tRNAAsn/Glu-tRNA <sup>Gln</sup> amidotransferase A subunit          |
| FRAAL6021 | 6524424 | 6525776 | validated/finished   | —    | Putative hydrolase                                                               |
| FRAAL6062 | 6576617 | 6578074 | validated/finished   | —    | putative membrane protein involved in divalent ion export                        |
| FRAAL6063 | 6578071 | 6579114 | validated/finished   | —    | putative membrane protein involved in export                                     |
| FRAAL6065 | 6579682 | 6580422 | validated/finished   | —    | Putative monooxygenase                                                           |
| FRAAL6137 | 6660392 | 6661453 | validated/inProgress | —    | Putative ribosylglycohydrolase                                                   |
| FRAAL6157 | 6681595 | 6682290 | validated/inProgress | —    | conserved hypothetical protein; putative Pantothenate kinase                     |
| FRAAL6210 | 6735920 | 6739129 | validated/inProgress | leuS | Leucyl-tRNA synthetase (Leucine--tRNA ligase)                                    |
| FRAAL6229 | 6757436 | 6758260 | validated/inProgress | udgB | Uracil-DNA glycosylase                                                           |
| FRAAL6268 | 6807173 | 6807766 | validated/inProgress | —    | putative membrane protein                                                        |
| FRAAL6270 | 6807763 | 6808506 | validated/inProgress | —    | hypothetical protein; putative signal peptide                                    |
| FRAAL6271 | 6808706 | 6809137 | validated/inProgress | —    | hypothetical protein                                                             |
| FRAAL6272 | 6809134 | 6809322 | validated/inProgress | —    | conserved hypothetical protein; putative membrane protein                        |
| FRAAL6275 | 6810505 | 6810918 | validated/inProgress | —    | conserved hypothetical protein                                                   |
| FRAAL6306 | 6844867 | 6847425 | validated/inProgress | —    | hypothetical protein; putative Putative serine/threonine protein kinase domain   |
| FRAAL6309 | 6849590 | 6850570 | validated/inProgress | —    | putative oxidoreductase                                                          |
| FRAAL6316 | 6857704 | 6858300 | validated/inProgress | —    | hypothetical protein                                                             |
| FRAAL6386 | 6940019 | 6940630 | validated/inProgress | —    | putative two-component system response regulator                                 |
| FRAAL6387 | 6940686 | 6941933 | validated/inProgress | —    | putative two-component system sensor kinase                                      |
| FRAAL6389 | 6942090 | 6942317 | validated/inProgress | —    | conserved hypothetical protein; Putative membrane protein (partial)              |
| FRAAL6402 | 6952795 | 6953127 | validated/inProgress | —    | hypothetical protein                                                             |
| FRAAL6411 | 6960410 | 6963772 | validated/inProgress | —    | hypothetical protein; putative serine/threonine-protein kinase                   |
| FRAAL6428 | 6989158 | 6989946 | validated/inProgress | —    | Transcriptional regulator (HTH-type)                                             |
| FRAAL6437 | 7001501 | 7004293 | validated/finished   | —    | Putative membrane-bound cysteine protease with a transglutaminase domain         |
| FRAAL6453 | 7017233 | 7018375 | validated/inProgress | —    | Oxidoreductase, electron transfer component                                      |
| FRAAL6454 | 7018372 | 7019517 | validated/inProgress | desA | Linoleoyl-CoA desaturase (DELTA(6)-desaturase)                                   |
| FRAAL6492 | 7060719 | 7061090 | validated/inProgress | —    | hypothetical protein                                                             |
| FRAAL6493 | 7061153 | 7061851 | validated/inProgress | —    | hypothetical protein                                                             |
| FRAAL6497 | 7063832 | 7064941 | validated/inProgress | —    | conserved hypothetical protein                                                   |
| FRAAL6501 | 7069164 | 7069778 | validated/inProgress | —    | hypothetical protein; putative signal peptide                                    |

|           |         |         |                      |      |                                                                     |
|-----------|---------|---------|----------------------|------|---------------------------------------------------------------------|
| FRAAL6511 | 7083945 | 7084799 | validated/inProgress | _    | Hypothetical protein                                                |
| FRAAL6516 | 7088393 | 7090576 | validated/inProgress | _    | hypothetical protein; putative membrane protein                     |
| FRAAL6553 | 7129736 | 7130620 | validated/inProgress | _    | conserved hypothetical protein                                      |
| FRAAL6565 | 7144614 | 7145810 | validated/inProgress | _    | Hypothetical protein; Putative septum site determining protein      |
| FRAAL6568 | 7148328 | 7148579 | validated/inProgress | _    | conserved hypothetical protein                                      |
| FRAAL6572 | 7150072 | 7150932 | validated/inProgress | _    | hypothetical protein                                                |
| FRAAL6653 | 7250627 | 7251421 | validated/finished   | _    | Secreted CAP protein                                                |
| FRAAL6694 | 7299935 | 7300315 | validated/finished   | _    | conserved protein of unknown function                               |
| FRAAL6705 | 7314692 | 7315150 | validated/inProgress | _    | hypothetical protein                                                |
| FRAAL6715 | 7323709 | 7324662 | validated/inProgress | _    | Hypothetical protein; putative Protein kinase-like domain           |
| FRAAL6717 | 7326356 | 7328869 | validated/inProgress | _    | conserved hypothetical protein; putative signal peptide             |
| FRAAL6724 | 7333518 | 7334219 | validated/finished   | purQ | Phosphoribosylformylglycinamide synthase I (FGAM synthase I)        |
| FRAAL6730 | 7338262 | 7340649 | validated/finished   | purL | Phosphoribosylformylglycinamide synthase II (FGAM synthase II)      |
| FRAAL6738 | 7347692 | 7347973 | validated/inProgress | purS | phosphoribosylformylglycinamide synthase                            |
| FRAAL6746 | 7352718 | 7353353 | validated/inProgress | _    | putative TetR family transcriptional regulator                      |
| FRAAL6769 | 7375790 | 7377367 | validated/finished   | _    | Conserved protein of unknown function, putative coiled-coil domains |
| FRAAL6773 | 7379912 | 7381807 | validated/inProgress | _    | hypothetical protein                                                |
| FRAAL6791 | 7398897 | 7399586 | validated/inProgress | _    | hypothetical protein; Putative methyltransferase                    |
| FRAAL6794 | 7401024 | 7401473 | validated/inProgress | _    | putative transcriptional regulatory protein                         |
| FRAAL6795 | 7401542 | 7402399 | validated/inProgress | qorB | Quinone oxidoreductase                                              |
| FRAAL6820 | 7425925 | 7426512 | validated/inProgress | _    | putative methyltransferase                                          |
| FRAAL6854 | 7456168 | 7456431 | validated/inProgress | _    | hypothetical protein                                                |
| FRAL4387  | 4780796 | 4781107 | validated/inProgress | _    | hypothetical protein                                                |
| FRAL6231  | 6787064 | 6787216 | validated/inProgress | _    | hypothetical protein                                                |

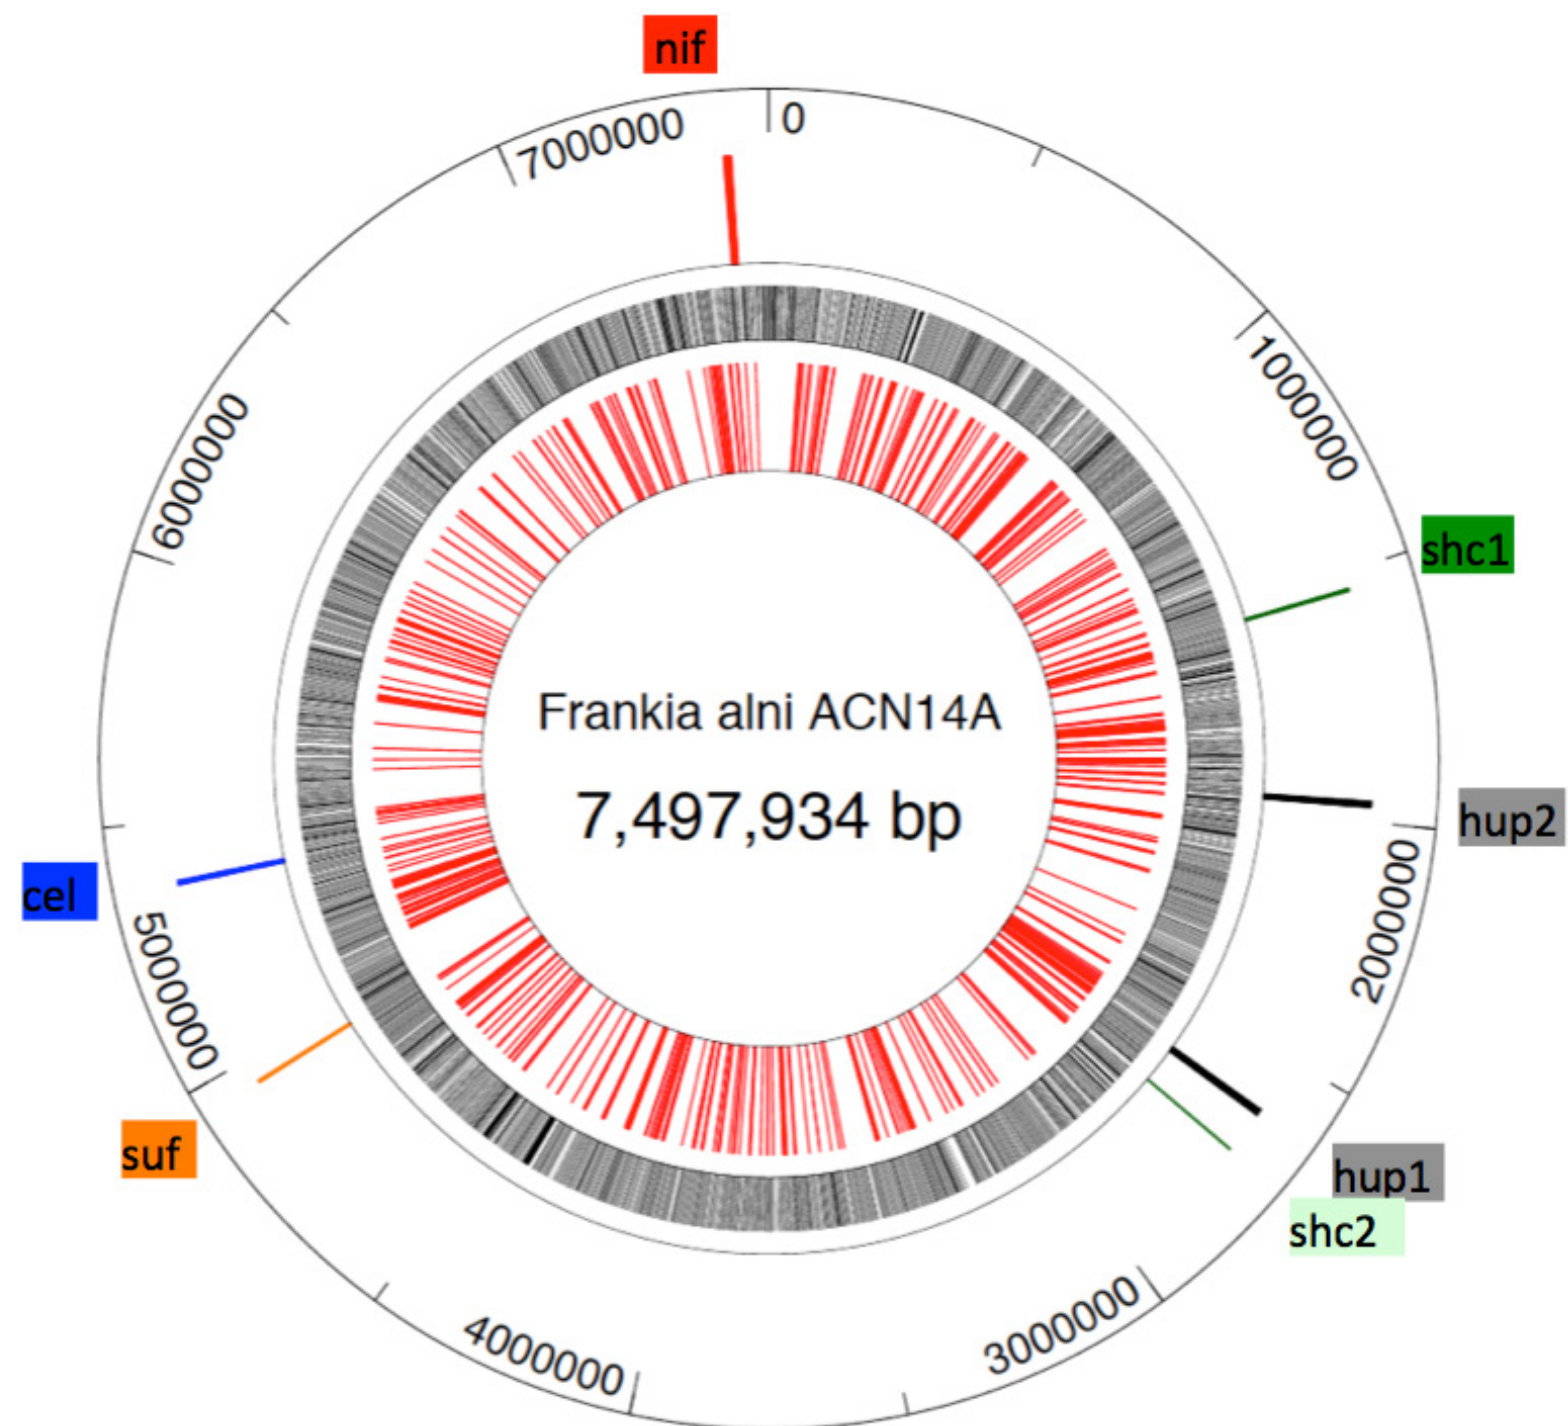

Supplementary Figure S1. Circular representation of the *Frankia alni* genome with from the inside out (in red) the genes absent from Ag45/Mut15 and AgPM24 at a threshold of 50% AA, all genes present (in gray) in ACN14a, and finally the known symbiosis genes with clockwise from the top the hopene synthesis and SHC genes cluster (SHC1 in dark green), the hydrogenase uptake #2 hup cluster (upregulated in symbiosis) in gray, the hydrogenase uptake #1 (upregulated in free-living condition) in gray, the SHC#2 gene in light green, the iron-sulfur cluster (suf in orange), the cellulase/cellulose synthase

cluster (cel in blue) and the nitrogenase cluster (nif in red).
